# Supplementary material
Source: publisher figshare collection journal article supplement (https://gsapubs.figshare.com/ndownloader/files/23307098)
Supplement: Supplementary file 1 [file 23307098]

## Sheet: Table S1. U-Pb Data
Table S1: Zircon U-Pb isotopic abundances
Analysis	U (ppm)	207Pb/235U	2s	206Pb/238U	2s	207Pb/206Pb	2s	r 38-6 v 7-6	Age 207Pb/206Pb (Ma)	2s
Session 1
RA10_1	113.9	20.04	0.21	0.6282	0.007	0.2326	0.0024	0.57279	3068	16
RA10_3	128.3	11.9	0.19	0.5125	0.008	0.1696	0.0016	0.27715	2552	16
RA10_4	72	19.99	0.37	0.671	0.012	0.2167	0.0022	0.076526	2956	17
RA10_5	137.4	12.51	0.14	0.5419	0.0077	0.1682	0.0017	0.65047	2537	17
RA10_6	39.9	11.94	0.22	0.5188	0.0089	0.1677	0.0023	0.29375	2534	22
RA10_7	162.4	26.9	0.29	0.7214	0.0079	0.2718	0.0025	0.36664	3315	14
RA10_9	70.1	21.75	0.26	0.6727	0.0085	0.2338	0.0027	0.57485	3084	19
RA10_10	87.2	11.49	0.24	0.499	0.013	0.1663	0.0023	0.43051	2523	23
RA10_11	53.9	13.61	0.18	0.5559	0.0079	0.1779	0.0022	0.51773	2631	20
RA10_13	38.1	19.56	0.33	0.6478	0.009	0.219	0.0025	0.28083	2975	19
RA10_14	354	16.52	0.29	0.5504	0.0091	0.2159	0.0023	-0.21309	2948	17
RA10_15	70.7	19.99	0.29	0.6369	0.0094	0.2283	0.0027	0.45596	3043	19
RA10_16	116.9	19.8	0.32	0.6207	0.0097	0.2317	0.0023	0.28793	3064	16
RA10_17	56.9	11.65	0.15	0.5112	0.0075	0.1664	0.0022	0.51861	2527	23
RA10_18	65.2	14.26	0.59	0.387	0.016	0.2673	0.0031	0.16695	3290	18
RA10_19	130.2	19.05	0.19	0.5969	0.0066	0.2325	0.0022	0.59702	3074	15
RA10_20	69.1	12.36	0.15	0.5163	0.0072	0.1735	0.0021	0.62836	2591	20
RA10_21	74.8	24.54	0.29	0.6902	0.0094	0.2593	0.0026	0.60996	3243	16
RA10_22	49.9	29.02	0.34	0.7291	0.0095	0.2909	0.0023	0.44072	3422	12
RA10_23	54.75	26.89	0.27	0.722	0.0085	0.2722	0.0029	0.62567	3317	16
RA10_24	93.6	12.48	0.13	0.5207	0.0063	0.1738	0.0019	0.62078	2595	18
RA10_25	178.4	11.5	0.11	0.4982	0.0053	0.1682	0.0016	0.52092	2538	16
RA10_26	54.1	12.41	0.18	0.5406	0.0077	0.1665	0.002	0.5281	2520	20
RA10_27	135.9	12.3	0.12	0.53	0.007	0.1684	0.0018	0.6334	2539	18
RA10_28	70.7	26.5	0.3	0.719	0.01	0.267	0.0028	0.64196	3286	16
RA10_29	36.8	12.23	0.22	0.5301	0.0091	0.1675	0.0023	0.3294	2529	23
RA10_30	128	27.31	0.44	0.733	0.011	0.2715	0.0023	0.39202	3314	13
RA10_31	126.7	20.66	0.21	0.6469	0.0068	0.2312	0.0017	0.35698	3059	12
RA10_33	111.2	15.24	0.37	0.542	0.012	0.2043	0.0022	0.14946	2859	17
RA10_35	117.2	12.03	0.12	0.5215	0.0059	0.1675	0.0016	0.48958	2531	16
RA10_36	299.4	10.647	0.093	0.4795	0.0048	0.1612	0.0014	0.49991	2469	14
RA10_37	135.9	16.8	0.16	0.5487	0.0061	0.2214	0.0018	0.5174	2989	13
RA10_38	278.1	23.05	0.4	0.642	0.011	0.261	0.0021	0.37751	3253	13
RA10_39	44.9	26.43	0.53	0.659	0.014	0.2913	0.0025	0.24311	3423	13
RA10_41	57.9	29	0.34	0.762	0.01	0.2747	0.0025	0.53455	3333	14
RA10_42	102.2	27.74	0.28	0.7307	0.0089	0.2742	0.0025	0.64003	3329	14
RA10_44	121	13.28	0.14	0.5373	0.0079	0.1776	0.0018	0.64188	2628	17
RA10_45	170.4	19.93	0.25	0.6149	0.0088	0.2326	0.0019	0.45236	3069	13
RA10_46	142.5	12.51	0.14	0.5257	0.0061	0.1722	0.0016	0.38785	2577	15
RA10_47	18.8	12.85	0.3	0.533	0.01	0.1744	0.0032	0.41318	2601	31
RA10_48	33.9	24.15	0.27	0.6822	0.0096	0.2557	0.0031	0.57415	3221	19
RA10_49	109.1	12.3	0.14	0.533	0.0066	0.1673	0.0015	0.47746	2529	15
RA10_50	126.5	12.24	0.14	0.5275	0.0068	0.1674	0.0017	0.51894	2534	17
RA10_51	61.1	13.75	0.14	0.547	0.0063	0.1823	0.0022	0.76728	2671	20
RA10_52	59.5	20.86	0.26	0.6455	0.0068	0.2349	0.0028	0.45649	3085	19
RA10_53	92.4	13.76	0.42	0.43	0.013	0.2322	0.0025	0.14566	3069	18
RA10_56	126.3	11.52	0.16	0.499	0.0082	0.1668	0.0016	0.47757	2526	16
RA10_57	129.3	13.3	0.19	0.5512	0.0083	0.1767	0.0016	0.36872	2621	15
RA10_58	46.2	19.82	0.38	0.653	0.013	0.2208	0.0024	0.17735	2989	17
RA10_59	195	18.91	0.51	0.553	0.011	0.2467	0.0022	-0.25487	3163	14
RA10_60	131.9	27.29	0.5	0.729	0.013	0.2679	0.0026	0.1309	3294	15
RA10_61	174.5	27.72	0.27	0.7453	0.0068	0.2684	0.0022	0.42153	3297	13
RA10_62	93.3	17.03	0.27	0.5847	0.0075	0.2101	0.0023	0.006845	2908	18
RA10_63	229	31.55	0.35	0.761	0.0095	0.3023	0.0024	0.37708	3481	12
RA10_64	139.1	18.98	0.2	0.6421	0.008	0.2144	0.0018	0.46676	2938	13
RA10_65	78.2	12.06	0.19	0.5125	0.0083	0.1699	0.0019	0.26442	2557	19
RA10_66	45	11.86	0.33	0.489	0.013	0.1745	0.0024	0.077071	2603	24
RA10_67	129.5	22.39	0.31	0.6177	0.0099	0.264	0.0025	0.50106	3271	14
RA10_68	96.8	11.48	0.23	0.4886	0.009	0.1709	0.0019	0.25016	2564	18
RA10_69	106.3	11.41	0.14	0.5105	0.0057	0.1628	0.0016	0.28483	2485	16
RA10_70	151.4	12.53	0.13	0.5254	0.0056	0.1741	0.0018	0.55834	2596	17
RA10_72	110.7	19.78	0.29	0.6276	0.0096	0.2294	0.0021	0.42936	3046	15
RA10_73	103.5	12.11	0.15	0.5273	0.0075	0.1677	0.0015	0.50221	2533	15
RA10_74	40.8	13.45	0.17	0.5466	0.0064	0.1785	0.0022	0.402	2636	21
RA10_75	57.5	12.24	0.14	0.5381	0.0064	0.1671	0.002	0.48865	2526	20
RA10_76	54.1	11.27	0.27	0.474	0.011	0.1737	0.0022	0.22132	2596	20
RA10_77	122.5	11.8	0.14	0.5186	0.0063	0.1651	0.0017	0.42113	2508	18
RA10_78	182	12.15	0.12	0.5274	0.0056	0.1678	0.0014	0.5421	2534	14
RA10_79	114.7	18.51	0.21	0.5942	0.0084	0.2277	0.0022	0.57001	3034	15
RA10_80	15.8	18.27	0.4	0.557	0.012	0.2388	0.0039	0.38262	3107	26
RA10_81	47.7	12.92	0.23	0.528	0.0091	0.1776	0.0025	0.32134	2627	24
RA10_82	64.9	12	0.15	0.5262	0.0063	0.1658	0.002	0.50309	2520	21
RA10_84	307	18.95	0.22	0.6295	0.0071	0.219	0.0013	0.3096	2973	9.5
RA10_85	149.4	12.49	0.12	0.5465	0.0069	0.1669	0.0015	0.56067	2531	15
RA10_86	35.8	19.56	0.36	0.657	0.011	0.2185	0.0032	0.081245	2972	25
RA10_88	192	11.54	0.11	0.507	0.0056	0.1662	0.0012	0.56281	2522	13
RA10_89	35.5	27.53	0.83	0.705	0.02	0.2857	0.0034	0.083907	3392	19
RA10_90	92.9	20.07	0.38	0.641	0.013	0.2284	0.0021	0.14218	3041	15
RA10_91	134.7	13.76	0.2	0.5533	0.0092	0.1782	0.0017	0.26524	2639	15
RA10_94	200	8.95	0.23	0.3655	0.0086	0.1774	0.002	0.30221	2627	19
RA10_95	68.6	20.68	0.25	0.6577	0.0075	0.2268	0.0021	0.27867	3028	15
RA10_96	99.9	25.2	0.46	0.723	0.012	0.2516	0.0025	0.26697	3193	16
RA10_97	23.5	17.8	1.4	0.518	0.038	0.2484	0.0052	-0.16454	3170	34
RA10_98	170.9	12.29	0.14	0.5285	0.0053	0.1691	0.0015	0.20382	2548	15
RA10_99	62	20.24	0.73	0.524	0.018	0.2765	0.0032	0.168	3343	18
RA10_100	87.8	13.03	0.17	0.5166	0.0069	0.1833	0.0019	0.44433	2683	18
RA5_1	140.7	4.638	0.057	0.2872	0.0036	0.1176	0.0014	0.52739	1919	21
RA5_9	116.1	7.36	0.43	0.3563	0.0069	0.1488	0.0095	0.44503	2261	96
RA5_11	138.9	5.96	0.12	0.3545	0.0047	0.1224	0.002	0.013544	1992	28
RA5_17	172	5.07	0.16	0.271	0.011	0.1399	0.0089	0.87265	2160	94
RA5_19	78	5.678	0.087	0.3572	0.0056	0.1154	0.0015	0.43794	1889	22
RA5_20	191.7	5.319	0.058	0.357	0.0043	0.1083	0.001	0.55212	1777	17
RA5_22	107.5	5.37	0.081	0.364	0.0052	0.1083	0.0013	0.46565	1768	22
RA5_23	113.2	4.957	0.095	0.288	0.012	0.1271	0.004	0.83871	2037	55
RA5_25	248	5.831	0.067	0.3779	0.0046	0.1126	0.0012	0.49334	1839	19
RA5_26	169.6	5.274	0.062	0.3553	0.0047	0.1082	0.0012	0.55493	1769	20
RA5_32	91.3	5.392	0.059	0.3621	0.0049	0.1079	0.0014	0.56613	1763	23
RA5_33	59.2	8.25	0.59	0.382	0.012	0.1519	0.0065	-0.49528	2335	70
RA5_34	230	4.92	0.11	0.3156	0.0099	0.1143	0.0017	0.79475	1867	27
RA5_36	112.8	5.252	0.062	0.3516	0.0039	0.1086	0.0014	0.59284	1773	23
RA5_37	163.4	5.361	0.051	0.3617	0.0041	0.1085	0.001	0.58517	1777	18
RA5_41	99.3	5.248	0.071	0.3506	0.0056	0.1088	0.0012	0.56287	1780	21
RA5_45	184.5	5.236	0.056	0.3497	0.0043	0.1085	0.0011	0.47585	1779	18
RA5_46	216.1	7.53	0.2	0.2973	0.0051	0.1867	0.0073	0.72517	2693	62
RA5_48	93.8	5.394	0.07	0.3584	0.0056	0.1093	0.0017	0.60336	1790	28
RA5_50	136.4	6.87	0.78	0.3417	0.0081	0.149	0.014	-0.55637	2260	150
RA5_54	97.2	5.299	0.069	0.3507	0.0044	0.1097	0.0013	0.4326	1796	22
RA5_56	76.3	5.282	0.071	0.3513	0.0048	0.1099	0.0014	0.50504	1797	24
RA5_59	71.8	5.327	0.087	0.3542	0.0055	0.1097	0.0015	0.39807	1793	25
RA5_68	122	5.646	0.068	0.3737	0.0053	0.1103	0.0012	0.53885	1802	19
RA5_70	125.9	5.68	0.21	0.3407	0.0047	0.1217	0.0056	0.64479	1943	71
RA5_73	222	6.92	0.12	0.3205	0.0074	0.1586	0.002	0.64017	2438	22
RA5_75	126	5.29	0.11	0.342	0.01	0.1146	0.0027	0.93056	1863	41
RVK1_2	63.5	3.885	0.086	0.2793	0.0051	0.101	0.0018	0.10293	1634	33
RVK1_4	246	3.101	0.061	0.2017	0.0034	0.1122	0.0018	0.32133	1834	29
RVK1_5	53.8	3.904	0.055	0.2872	0.0043	0.0988	0.0016	0.57476	1596	30
RVK1_11	218.4	3.981	0.053	0.295	0.0041	0.09823	0.00099	0.34681	1588	19
RVK1_12	127.9	3.866	0.069	0.2667	0.005	0.1045	0.0014	0.46993	1705	25
RVK1_16	282	3.123	0.038	0.2228	0.0031	0.10156	0.00093	0.53583	1653	17
RVK1_18	80.2	3.678	0.071	0.2465	0.0064	0.1116	0.0024	0.69104	1824	40
RVK1_19	90.2	3.11	0.13	0.1956	0.005	0.114	0.0032	-0.19616	1864	50
RVK1_20	94.8	3.706	0.078	0.2665	0.0068	0.1017	0.0016	0.6523	1658	28
RVK1_22	146.1	2.42	0.039	0.2184	0.0033	0.0805	0.0011	0.35406	1211	25
RVK1_24	197	2.583	0.052	0.1935	0.0036	0.0984	0.0017	0.2448	1591	31
RVK1_26	122.4	2.298	0.033	0.2095	0.0033	0.0797	0.0011	0.48193	1189	27
RVK1_29	238.3	1.937	0.041	0.1605	0.0064	0.0893	0.0032	0.70949	1382	65
RVK1_30	257	3.044	0.074	0.1885	0.0069	0.1184	0.0021	0.72045	1925	32
RVK1_31	56	2.349	0.051	0.2138	0.0038	0.079	0.0015	0.38003	1169	37
RVK1_33	101.6	2.194	0.038	0.2014	0.0033	0.0787	0.0013	0.45864	1165	34
RVK1_34	169	4.614	0.066	0.2997	0.0046	0.1136	0.0014	0.65382	1857	22
RVK1_35	77.4	3.757	0.059	0.2828	0.0043	0.0968	0.0016	0.57025	1556	31
RVK1_37	145.2	4.403	0.066	0.2982	0.0049	0.1054	0.0014	0.34844	1720	25
RVK1_45	34.8	2.37	0.13	0.1796	0.0049	0.0941	0.0044	0.43095	1471	87
RVK1_52	65.6	2.405	0.045	0.218	0.0026	0.0794	0.0015	0.39328	1182	37
RVK1_53	95.4	4.219	0.049	0.3043	0.0034	0.1005	0.0013	0.55137	1635	23
RVK1_54	271.8	4.22	0.078	0.268	0.0078	0.115	0.0017	0.80709	1879	27
RVK1_60	70.3	2.231	0.039	0.2087	0.0028	0.0777	0.0017	0.48515	1138	44
RVK1_61	170	2.173	0.03	0.2039	0.0027	0.0776	0.0012	0.78364	1131	30
RVK1_63	84.4	4.677	0.08	0.3209	0.004	0.1065	0.0017	0.24342	1735	29
RVK1_64	79.8	2.299	0.043	0.2088	0.0026	0.0794	0.0014	0.40589	1186	35
RVK1_65	333	2.932	0.046	0.1568	0.0021	0.1354	0.002	0.47354	2164	26
RVK1_66	147.7	3.412	0.041	0.224	0.0039	0.1101	0.0019	0.67952	1805	32
RVK1_67	437	3.65	0.28	0.209	0.02	0.1303	0.003	0.89081	2096	40
RVK1_69	164	2.68	0.1	0.2369	0.0082	0.0817	0.0014	0.029019	1236	33
RVK1_71	208	3.366	0.062	0.1603	0.0041	0.1539	0.003	0.75178	2387	33
RVK1_72	197.9	2.464	0.038	0.19	0.0034	0.0943	0.0016	0.62692	1519	31
RVK1_75	38.76	2.148	0.058	0.2071	0.0041	0.0759	0.0019	0.39725	1090	50
RVK1_76	133.9	2.219	0.036	0.205	0.0029	0.0785	0.0011	0.41073	1157	29
RVK1_80	182.6	2.324	0.03	0.2117	0.0025	0.0799	0.0011	0.52996	1189	27
RVK1_81	133	2.591	0.064	0.1958	0.006	0.0956	0.0019	0.56137	1535	37
RVK1_82	91.1	3.925	0.064	0.28	0.0044	0.1022	0.0017	0.39518	1666	31
RVK1_84	51.6	2.232	0.053	0.2054	0.0042	0.0799	0.0021	-0.11039	1188	48
RVK1_88	228.6	4.272	0.079	0.2797	0.0035	0.1109	0.0018	0.0904	1809	29
RVK1_89	199.2	2.447	0.033	0.2088	0.0031	0.0848	0.0011	0.55721	1310	26
RVK1_95	385	9.73	0.81	0.2264	0.008	0.299	0.016	-0.88687	3418	91
RVK1_99	193	2.168	0.037	0.1639	0.0042	0.0946	0.0024	0.75207	1522	49
Session 2
CRP04_1	134	1.936	0.019	0.1864	0.0015	0.0758	0.00063	0.41812	1101.8	8.3
CRP04_2	189	1.224	0.011	0.1357	0.0012	0.06601	0.0007	0.51765	820.3	6.9
CRP04_3	357	1.625	0.011	0.16387	0.00093	0.07216	0.00042	0.36765	978.2	5.2
CRP04_4	114.4	1.01	0.026	0.1168	0.0025	0.06242	0.00075	-0.098027	712	15
CRP04_5	158.4	1.367	0.032	0.1466	0.0027	0.0688	0.0016	0.11663	882	15
CRP04_6	80.9	1.887	0.042	0.1776	0.0026	0.0764	0.0012	-0.16661	1054	14
CRP04_7	322	1.606	0.011	0.16256	0.00094	0.07151	0.00048	0.32804	971	5.2
CRP04_8	88.6	0.792	0.015	0.09488	0.00097	0.0605	0.0011	0.095551	584.3	5.7
CRP04_9	166.5	1.946	0.021	0.1857	0.0015	0.07597	0.00073	0.46757	1097.9	8.1
CRP04_10	1180	1.626	0.018	0.1633	0.0015	0.07239	0.00037	0.20506	975	8.5
CRP04_11	1015	2.915	0.037	0.2364	0.0035	0.08896	0.00073	0.46099	1368	18
CRP04_12	251	1.653	0.012	0.1659	0.001	0.07213	0.00042	0.27921	989.7	5.6
CRP04_13	123	1.665	0.015	0.1679	0.0013	0.07195	0.00076	0.51035	1000.4	7.2
CRP04_14	331	3.375	0.028	0.262	0.0017	0.09294	0.00048	-0.22	1500	8.5
CRP04_15	286	0.809	0.013	0.0961	0.0014	0.06101	0.00062	0.13839	591.3	8.2
CRP04_16	561	2.008	0.022	0.1895	0.0021	0.07654	0.00052	-0.62583	1119	11
CRP04_17	557	3.846	0.05	0.282	0.004	0.09913	0.00054	0.30852	1601	20
CRP04_18	567	1.459	0.012	0.1507	0.0011	0.07046	0.00045	0.32861	904.7	6.4
CRP04_19	4110	3.98	0.32	0.254	0.019	0.11336	0.00091	-0.81122	1453	96
CRP04_20	525	5.802	0.034	0.3497	0.0028	0.12012	0.00061	0.6721	1933	14
CRP04_21	693	1.618	0.018	0.1621	0.0018	0.0723	0.00054	0.39672	968.1	9.9
CRP04_22	361	1.543	0.017	0.158	0.0013	0.07085	0.00047	-0.41786	945.6	7.1
CRP04_23	225	3.043	0.023	0.2456	0.0019	0.08955	0.00067	0.33441	1417	10
CRP04_24	28.5	34.5	0.57	0.7575	0.0098	0.3264	0.0051	0.055913	3639	37
CRP04_25	249	1.145	0.018	0.1269	0.0019	0.06561	0.00064	0.19715	770	11
CRP04_26	286	2.139	0.033	0.1965	0.003	0.0793	0.0011	0.081859	1157	16
CRP04_27	247	3.675	0.046	0.2697	0.0027	0.09931	0.00098	0.10435	1539	14
CRP04_28	337.5	10.37	0.18	0.4469	0.0079	0.1685	0.0019	0.0742	2380	35
CRP04_29	604	5.346	0.034	0.3369	0.002	0.11487	0.00062	0.38159	1871.4	9.7
CRP04_30	216	2.473	0.062	0.2162	0.0033	0.08208	0.00095	-0.57016	1261	18
CRP04_31	1180	1.53	0.049	0.1568	0.0047	0.0707	0.00039	-0.36662	938	26
CRP04_32	374	10.82	0.1	0.4776	0.004	0.16313	0.00068	0.15425	2516	17
CRP04_33	541	1.6736	0.0085	0.1667	0.0011	0.07265	0.00047	0.65151	994.7	6.4
CRP04_34	362	19.85	0.13	0.5864	0.0044	0.2453	0.0011	0.45079	2974	18
CRP04_35	225	1.312	0.017	0.1386	0.0016	0.06872	0.00068	0.32872	838	8.8
CRP04_36	174	3.97	0.033	0.2888	0.0025	0.09934	0.00069	0.38543	1635	13
CRP04_37	99.3	3.831	0.037	0.2832	0.0024	0.09783	0.00085	0.15774	1609	12
CRP04_38	111.2	9.789	0.079	0.4387	0.0023	0.16153	0.00091	0.16386	2345	10
CRP04_39	188.1	1.277	0.017	0.139	0.0013	0.0662	0.00078	0.39178	839.2	7.2
CRP04_40	960	1.305	0.023	0.1418	0.0024	0.06677	0.00046	0.13991	854	14
CRP04_41	150.8	3.522	0.033	0.2637	0.002	0.09665	0.00076	0.21458	1509	10
CRP04_42	3090	0.6561	0.0057	0.08032	0.00061	0.05889	0.00036	0.20535	498	3.6
CRP04_43	265	12.79	0.19	0.5255	0.0074	0.1757	0.0014	0.40033	2721	31
CRP04_44	160.3	9.72	0.11	0.4403	0.006	0.1599	0.0018	0.56175	2352	27
CRP04_46	201.8	1.898	0.014	0.1833	0.0014	0.075	0.00072	0.56737	1084.7	7.7
CRP04_47	59	8.11	0.11	0.3866	0.0052	0.1538	0.0013	0.27711	2107	24
CRP04_48	251.8	9.499	0.088	0.4284	0.0037	0.1612	0.001	0.2083	2298	17
CRP04_49	415	1.61	0.019	0.162	0.0013	0.07193	0.00048	-0.14599	967.6	7.4
CRP04_50	419	1.635	0.01	0.1661	0.001	0.07148	0.00052	0.54599	991.4	5.8
CRP04_51	97.1	9.02	0.13	0.4048	0.0057	0.1622	0.0015	-0.066845	2191	26
CRP04_52	318	1.932	0.012	0.1839	0.0011	0.07629	0.00049	0.54765	1088.5	5.9
CRP04_53	171	10.89	0.19	0.4724	0.0043	0.1683	0.0031	0.41261	2494	19
CRP04_54	404	1.897	0.031	0.1818	0.0025	0.07548	0.00081	-0.37	1077	13
CRP04_55	603	6.6	1.1	0.337	0.04	0.1434	0.0065	-0.88283	1860	190
CRP04_56	186.6	7.93	0.14	0.3765	0.0058	0.1531	0.0015	-0.25082	2059	27
CRP04_57	384	2.027	0.013	0.1926	0.0011	0.07639	0.00046	0.40155	1135.4	6
CRP04_58	72.3	8.808	0.079	0.4069	0.0029	0.1574	0.0012	0.31916	2200	13
CRP04_59	592	1.625	0.017	0.1635	0.0012	0.07227	0.00047	0.13701	976.2	6.8
CRP04_60	4004	0.7164	0.0044	0.08725	0.00053	0.0598	0.00048	0.41664	539.2	3.2
CRP04_61	119	7.88	0.31	0.364	0.014	0.1561	0.0011	-0.10325	1997	64
CRP04_62	475	0.7546	0.0068	0.09259	0.00051	0.05927	0.00043	0.16343	570.8	3
CRP04_63	459	3.945	0.048	0.2858	0.0032	0.10026	0.00052	-0.87432	1620	16
CRP04_64	190.7	5.239	0.05	0.3326	0.0023	0.1148	0.0011	0.38949	1851	11
CRP04_65	231	1.807	0.013	0.1807	0.0013	0.07296	0.00062	0.58173	1070.6	7.2
DA1_3_1	325	1.724	0.014	0.1733	0.0011	0.07245	0.00048	0.3058	1030.3	6.2
DA1_3_2	35	1.756	0.037	0.1734	0.0033	0.0732	0.0012	0.32982	1030	18
DA1_3_3	313	5.188	0.044	0.3322	0.0032	0.11365	0.00057	0.48087	1849	16
DA1_3_4	733	3.71	0.11	0.2118	0.0083	0.1276	0.0031	0.59928	1237	44
DA1_3_5	283	1.21	0.013	0.1301	0.0011	0.06739	0.00066	0.45169	788.6	6.3
DA1_3_6	175.9	5.373	0.047	0.3379	0.0035	0.11373	0.00084	0.53925	1877	17
DA1_3_7	178.4	2.776	0.025	0.2344	0.0018	0.0859	0.001	0.63838	1357.5	9.6
DA1_3_8	189	3.835	0.042	0.2774	0.0024	0.09977	0.00077	-0.048093	1580	13
DA1_3_9	116	4.603	0.039	0.3075	0.0022	0.10867	0.00088	0.44428	1728	11
DA1_3_10	402	4.83	0.32	0.305	0.012	0.1159	0.0032	-0.81342	1714	57
DA1_3_11	116.4	7.924	0.096	0.3716	0.0035	0.1538	0.0018	-0.084298	2037	16
DA1_3_12	748	4.27	0.11	0.2616	0.0095	0.118	0.0017	0.39693	1497	49
DA1_3_13	611	3.868	0.044	0.2301	0.0029	0.1219	0.0008	0.36793	1335	15
DA1_3_14	151.9	10.62	0.098	0.4708	0.0047	0.1637	0.0012	0.3801	2487	20
DA1_3_15	1300	3.13	0.082	0.1918	0.0056	0.11834	0.00092	0.6775	1131	30
DA1_3_16	1365	1.806	0.092	0.0896	0.0061	0.1472	0.0022	0.928	552	36
DA1_3_17	163.3	4.388	0.041	0.3024	0.0032	0.105	0.0012	0.57327	1703	16
DA1_3_18	589	0.755	0.014	0.0866	0.0019	0.063	0.0014	0.55201	535	12
DA1_3_19	689	0.928	0.058	0.0759	0.0016	0.0886	0.0053	0.20301	471.4	9.4
DA1_3_20	343	2.622	0.041	0.2196	0.0026	0.08638	0.00096	0.23678	1280	14
DA1_3_21	336	1.406	0.018	0.0989	0.0015	0.102	0.0015	0.66723	607.7	8.9
DA1_3_22	422	1.725	0.089	0.1697	0.0069	0.0748	0.002	0.74874	1010	38
DA1_3_23	87.9	4.324	0.038	0.2977	0.0028	0.1047	0.0011	0.62978	1682	14
DA1_3_24	142.5	4.924	0.06	0.3119	0.0034	0.1141	0.0014	0.22332	1749	17
DA1_3_25	296	1.64	0.027	0.1449	0.0012	0.0816	0.0014	-0.010731	872.1	6.7
DA1_3_26	285	1.709	0.013	0.1687	0.0014	0.07302	0.00057	0.61042	1005	7.5
DA1_3_27	620.8	5.057	0.066	0.3245	0.0041	0.1117	0.0012	0.51473	1812	20
DA1_3_28	499	1.749	0.048	0.1727	0.0033	0.0749	0.002	0.205	1027	18
DA1_3_29	124	4.492	0.033	0.3102	0.0029	0.10511	0.00082	0.25025	1742	14
DA1_3_30	273	2.791	0.041	0.2342	0.003	0.0861	0.0015	0.55002	1356	16
DA1_3_31	150.5	4.316	0.078	0.3003	0.0039	0.1035	0.0011	-0.46948	1693	19
DA1_3_32	13.3	1.655	0.051	0.1562	0.0035	0.0767	0.0028	0.43017	935	19
DA1_3_33	661	3.72	0.15	0.252	0.016	0.1074	0.003	0.89107	1445	81
DA1_3_34	580	3.637	0.039	0.2236	0.0029	0.11778	0.00082	0.57462	1301	15
DA1_3_35	96.7	4.291	0.067	0.2808	0.0022	0.1097	0.0018	0.34585	1595	11
DA1_3_36	631	5.64	0.36	0.299	0.016	0.1364	0.0015	-0.76974	1687	79
DA1_3_37	441.6	7.473	0.092	0.3401	0.0046	0.1574	0.003	0.67191	1887	22
DA1_3_38	205	2.522	0.053	0.1853	0.0027	0.0979	0.0014	0.35357	1096	15
DA1_3_39	81.4	4.316	0.067	0.2978	0.0052	0.1051	0.0015	0.50688	1680	26
DA1_3_40	276	1.705	0.012	0.1693	0.0011	0.07246	0.00053	0.47208	1008.9	6.1
DA1_3_41	263	1.329	0.019	0.121	0.0011	0.0791	0.0011	0.19316	736.3	6.3
DA1_3_42	843	2.505	0.034	0.1307	0.0014	0.1379	0.00086	0.010134	791.6	7.9
DA1_3_43	742	2.993	0.031	0.1673	0.0017	0.1291	0.0012	0.50843	997.1	9.2
DA1_3_44	570	0.9025	0.0059	0.09492	0.0007	0.06844	0.00059	0.65913	584.6	4.1
DBMK1_1	126	17.76	0.25	0.579	0.0055	0.2227	0.0022	0.525	2944	22
DBMK1_2	442	8.8	0.16	0.2293	0.0033	0.2791	0.003	-0.29711	1330	17
DBMK1_3	62.5	13.69	0.15	0.4523	0.0071	0.2178	0.0028	0.75066	2405	32
DBMK1_4	182	11.13	0.11	0.473	0.0049	0.1697	0.0016	0.41503	2496	22
DBMK1_5	636	3.2	0.22	0.1187	0.0078	0.1936	0.0014	-0.082511	720	44
DBMK1_6	117.6	11.18	0.17	0.4817	0.0063	0.1691	0.0016	0.38425	2534	27
DBMK1_7	64.7	15.72	0.11	0.5189	0.0042	0.2191	0.0014	0.51707	2696	18
DBMK1_8	90.3	9.69	0.26	0.42	0.012	0.1665	0.0014	0.40186	2257	56
DBMK1_9	47.4	16.3	0.28	0.5341	0.0079	0.2208	0.0028	0.30591	2758	33
DBMK1_10	135	10.66	0.15	0.4396	0.0052	0.175	0.0014	0.16606	2349	23
DBMK1_11	53.3	14.49	0.17	0.4819	0.0052	0.2182	0.0016	0.37181	2538	23
DBMK1_12	67.4	17.72	0.12	0.5798	0.0044	0.2207	0.0015	0.58393	2955	18
DBMK1_13	105.5	16.45	0.23	0.5345	0.0063	0.222	0.0019	0.1088	2760	26
DBMK1_14	44.2	16.53	0.23	0.5534	0.005	0.214	0.0023	0.097296	2839	21
DBMK1_15	26.93	25.3	0.21	0.6688	0.0067	0.2734	0.0021	0.53586	3301	26
DBMK1_16	55.3	14.32	0.34	0.479	0.013	0.2168	0.0033	0.42854	2521	56
DBMK1_17	54.4	23.2	0.11	0.6451	0.0046	0.2601	0.0016	0.72205	3209	18
DBMK1_18	90.6	11.595	0.057	0.4807	0.0026	0.1747	0.0011	0.62462	2530	11
DBMK1_19	208.3	11.52	0.12	0.4845	0.0065	0.1719	0.0021	0.55313	2547	28
DBMK1_20	324	9.71	0.3	0.3938	0.0062	0.178	0.0043	-0.02508	2140	29
DBMK1_21	116	10.92	0.35	0.4353	0.0064	0.181	0.0046	-0.099738	2329	28
DBMK1_22	130	11.12	0.11	0.4651	0.006	0.1716	0.0015	0.59786	2461	26
DBMK1_24	76.8	23.6	0.35	0.6285	0.0087	0.2732	0.0016	0.23153	3143	34
DBMK1_25	164	11.44	0.11	0.4905	0.0056	0.1687	0.0013	0.50644	2572	24
DBMK1_26	93.7	14.08	0.52	0.4445	0.0096	0.2299	0.0058	-0.14406	2375	42
DBMK1_27	131.4	12.54	0.22	0.4463	0.0061	0.2045	0.0037	0.56964	2378	27
DBMK1_28	31.52	17.3	0.32	0.562	0.01	0.2241	0.0028	0.16515	2873	42
DBMK1_29	77.1	16.76	0.27	0.5733	0.0053	0.2126	0.0022	-0.3263	2921	22
DBMK1_31	310	7.6	1	0.318	0.044	0.1747	0.0015	0.61304	1760	220
DBMK1_32	71	16.77	0.14	0.5606	0.0048	0.2174	0.0015	0.5404	2869	20
DBMK1_33	70.2	9.35	0.26	0.4059	0.0085	0.1686	0.0018	0.15445	2196	39
DBMK1_34	58.7	11.32	0.15	0.4865	0.0053	0.1704	0.0014	0.45887	2555	23
DBMK1_35	282	8.42	0.72	0.305	0.016	0.1917	0.0059	-0.69959	1714	77
DBMK1_36	85.3	17.54	0.15	0.5734	0.0071	0.2216	0.0024	0.57534	2921	29
DBMK1_37	66.6	25.83	0.2	0.6795	0.0064	0.2751	0.0016	0.077265	3342	25
DBMK1_38	112.7	1.71	0.018	0.1686	0.0014	0.07379	0.00077	0.45017	1005.2	7.8
DBMK1_39	153	16.51	0.23	0.5505	0.0069	0.2185	0.002	0.4728	2827	29
DBMK1_40	94.1	22.19	0.27	0.6188	0.0064	0.2615	0.0021	0.20902	3105	25
DBMK1_41	103.6	9.9	0.14	0.4185	0.0079	0.1706	0.0016	0.62254	2252	36
DBMK1_42	85.8	17.28	0.11	0.5713	0.0043	0.2206	0.0012	0.59384	2913	18
DBMK1_43	28.8	10.095	0.095	0.4405	0.0035	0.1678	0.0018	0.50847	2353	16
DBMK1_44	112.4	11.146	0.078	0.4835	0.0042	0.1683	0.0013	0.6043	2542	18
DBMK1_45	77.7	15.64	0.11	0.5291	0.0044	0.215	0.0017	0.53527	2737	18
DBMK1_46	62.9	17.48	0.17	0.5812	0.0064	0.2198	0.0013	0.44154	2953	26
DBMK1_47	477	4.08	0.2	0.1658	0.0076	0.1811	0.0018	-0.33199	987	42
DBMK1_48	204.8	5.153	0.087	0.1831	0.0026	0.2072	0.0027	0.35579	1084	14
DBMK1_49	602	2.433	0.042	0.0964	0.002	0.1846	0.0021	0.045985	593	12
DBMK1_50	113	16.95	0.17	0.5615	0.007	0.2202	0.0013	0.55389	2872	29
DBMK1_51	362	6.57	0.48	0.224	0.016	0.2137	0.0016	-0.053126	1295	84
DBMK1_52	100.3	10.82	0.18	0.3559	0.0063	0.2219	0.0019	0.37881	1962	30
DBMK1_53	425	4.88	0.19	0.1974	0.0079	0.1791	0.0014	0.25775	1165	41
DBMK1_54	119	6.94	0.28	0.2464	0.0094	0.2054	0.0017	-0.15215	1418	49
DBMK1_55	156.8	9.34	0.16	0.3999	0.0068	0.17	0.0012	-0.05005	2168	31
DBMK1_56	129.4	13.93	0.19	0.4969	0.0085	0.2035	0.0016	0.54913	2600	37
DBMK1_57	99.1	11.14	0.11	0.4675	0.0058	0.1718	0.0014	0.52789	2472	25
DBMK1_58	26.3	9.38	0.12	0.4103	0.0057	0.1684	0.0016	0.38612	2215	26
DBMK1_59	41.6	17.56	0.12	0.5799	0.0046	0.2197	0.0013	0.37116	2948	19
DBMK1_60	194.4	11.04	0.14	0.4734	0.0055	0.17019	0.00079	0.23092	2498	24
DBMK1_61	86.8	9.66	0.23	0.423	0.011	0.1668	0.0019	0.44719	2272	49
DBMK1_62	128.6	6.531	0.099	0.2174	0.0028	0.2192	0.0015	-0.037053	1268	15
DBMK4_1	16.7	26.84	0.32	0.6955	0.0085	0.2783	0.0029	0.49398	3402	32
DBMK4_2	148	10.23	0.12	0.4181	0.0076	0.178	0.0025	0.81358	2251	35
DBMK4_3	151.5	9.505	0.076	0.4026	0.0042	0.1699	0.0015	0.63394	2181	19
DBMK4_4	90.1	12.1	0.1	0.4964	0.0037	0.1751	0.0014	0.42448	2598	16
DBMK4_5	91.5	22.37	0.13	0.6291	0.0044	0.2567	0.0012	0.62878	3146	17
DBMK4_6	47.6	16.04	0.16	0.5522	0.0054	0.2085	0.0021	0.31462	2837	23
DBMK4_7	55.3	11.86	0.13	0.4945	0.0052	0.1739	0.0015	0.49066	2592	23
DBMK4_8	50.8	22.49	0.38	0.641	0.0085	0.2521	0.003	-0.47498	3191	34
DBMK4_9	171	11.65	0.15	0.4909	0.0066	0.1722	0.0018	0.53963	2574	28
DBMK4_10	146.2	25.95	0.26	0.6202	0.0075	0.3027	0.0019	0.3499	3110	30
DBMK4_11	43.3	18.7	0.25	0.5952	0.0061	0.2259	0.0023	-0.067685	3010	25
DBMK4_12	73.1	12.03	0.13	0.4971	0.0055	0.176	0.0015	0.414	2601	24
DBMK4_13	178.4	10.66	0.25	0.458	0.011	0.1689	0.0023	0.31449	2429	50
DBMK4_14	109.6	11.016	0.096	0.4758	0.0043	0.169	0.0015	0.64112	2509	19
DBMK4_15	131.5	11.03	0.14	0.4729	0.0057	0.1684	0.0015	0.25171	2496	25
DBMK4_16	100.3	17.89	0.16	0.5855	0.0052	0.2216	0.0016	0.34632	2977	21
DBMK4_17	100.6	12.134	0.07	0.5027	0.0039	0.1743	0.001	0.66328	2625	17
DBMK4_18	62.4	12.022	0.093	0.4964	0.0046	0.175	0.0013	0.57131	2598	20
DBMK4_19	110	9.648	0.087	0.3974	0.006	0.1757	0.0019	0.77183	2157	28
DBMK4_20	76.9	18.08	0.2	0.5922	0.0072	0.219	0.0021	-0.50028	2997	29
DBMK4_21	183.5	10.99	0.12	0.4685	0.0045	0.16934	0.00093	0.090412	2476	20
DBMK4_22	165.4	10.86	0.11	0.4663	0.0059	0.1688	0.0013	0.4723	2466	26
DBMK4_23	124	21.47	0.3	0.6285	0.0062	0.2473	0.002	-0.31656	3143	24
DBMK4_24	121.2	15.67	0.16	0.5121	0.006	0.2214	0.0019	0.57323	2665	25
DBMK4_25	81.9	16.25	0.18	0.5426	0.0055	0.2184	0.002	0.35625	2794	23
DBMK4_26	46.4	19.81	0.24	0.5959	0.0054	0.2405	0.0025	0.21229	3015	22
DBMK4_27	110	11.764	0.077	0.4925	0.004	0.173	0.0012	0.55038	2584	16
DBMK4_28	23.96	17.47	0.33	0.562	0.011	0.2256	0.0037	0.2413	2875	44
DBMK4_29	79	21.54	0.24	0.5733	0.0064	0.2722	0.0022	0.54999	2921	26
DBMK4_30	104.3	10.949	0.094	0.4698	0.005	0.1691	0.0013	0.54158	2483	22
DBMK4_31	81.8	12.169	0.081	0.4997	0.0038	0.1776	0.0012	0.59963	2612	17
DBMK4_32	47.4	17.65	0.14	0.5871	0.0049	0.2186	0.0014	0.40414	2977	20
DBMK4_33	56.6	15.85	0.28	0.4438	0.0082	0.2623	0.0055	0.59602	2367	37
DBMK4_34	66.8	25.53	0.35	0.683	0.013	0.2692	0.0037	0.63202	3354	50
DBMK4_35	118	18.3	0.2	0.5961	0.0075	0.2209	0.0014	0.5368	3013	30
DBMK4_36	112.5	12.528	0.073	0.5093	0.0034	0.17875	0.00098	0.52055	2653	15
DBMK4_37	396.7	1.84	0.023	0.1793	0.0023	0.07424	0.00073	0.2608	1063	13
DBMK4_38	188	249	35	2.45	0.33	0.737	0.024	-0.63096	7710	650
DBMK4_39	121	11.95	0.26	0.5014	0.008	0.1733	0.0023	-0.12059	2619	34
DBMK4_40	70.8	18.334	0.099	0.6019	0.0038	0.2211	0.001	0.58754	3037	15
KRSV_1	76.8	3.493	0.055	0.2536	0.0023	0.0996	0.0013	-0.20894	1457	12
KRSV_2	123.9	11.086	0.087	0.4807	0.0039	0.16569	0.00094	-0.01048	2530	17
KRSV_3	95.8	4.055	0.035	0.2887	0.0022	0.10116	0.00081	0.44983	1635	11
KRSV_4	244	5.43	0.13	0.3451	0.0088	0.1136	0.0012	0.23282	1910	42
KRSV_5	86.5	5.486	0.059	0.3497	0.0031	0.11332	0.00092	0.28034	1933	15
KRSV_6	305.3	15.98	0.27	0.5451	0.0092	0.2115	0.0015	0.23566	2804	38
KRSV_7	133.5	3.978	0.035	0.2908	0.0021	0.09897	0.00079	0.26371	1645	10
KRSV_8	417	2.252	0.072	0.1679	0.0088	0.0972	0.0024	0.89898	1000	48
KRSV_9	165.1	2.946	0.052	0.1951	0.0028	0.1083	0.002	0.4525	1149	15
KRSV_10	269	3.726	0.046	0.2736	0.0047	0.0991	0.0011	0.6482	1559	24
KRSV_11	68.4	2.694	0.03	0.2311	0.0018	0.08419	0.00099	0.48741	1340.3	9.3
KRSV_12	235.7	2.695	0.023	0.2235	0.0019	0.08812	0.00085	0.31147	1301	10
KRSV_13	255	4.925	0.052	0.3058	0.0028	0.1164	0.001	0.32628	1720	14
KRSV_14	104.8	3.695	0.029	0.2757	0.0019	0.0968	0.00087	0.54931	1572.4	9.5
KRSV_15	342	4.5	0.084	0.2995	0.0058	0.1089	0.0011	0.10116	1688	29
KRSV_16	115.2	3.068	0.048	0.2463	0.0039	0.0897	0.0017	0.67484	1419	20
KRSV_17	130	4.238	0.047	0.2956	0.003	0.1042	0.0011	0.39136	1669	15
KRSV_18	176.1	2.938	0.024	0.2422	0.0018	0.0872	0.00073	0.4257	1397.8	9.1
KRSV_19	181.7	4.271	0.049	0.3008	0.0021	0.10288	0.00095	0.22755	1695	10
KRSV_20	49.8	3.676	0.046	0.2669	0.0023	0.1	0.0014	0.40018	1526	12
KRSV_21	98.6	3.829	0.028	0.2795	0.0016	0.09871	0.00075	0.32859	1588.8	8.3
KRSV_22	212	2.122	0.02	0.1952	0.0017	0.07938	0.00067	0.52062	1149.6	9.3
KRSV_23	280	2.771	0.025	0.2278	0.0021	0.08779	0.00072	0.5146	1323	11
KRSV_24	162.1	2.923	0.022	0.2418	0.0017	0.08737	0.00056	0.42239	1395.9	8.7
KRSV_25	417	2.34	0.024	0.1686	0.0023	0.09942	0.00088	0.57858	1004	13
KRSV_26	84.7	4.35	0.051	0.3024	0.0026	0.1045	0.0013	0.41022	1703	13
KRSV_27	251.4	3.791	0.062	0.281	0.0053	0.0981	0.001	0.52331	1596	27
KRSV_28	208.6	2.249	0.018	0.2013	0.0013	0.08103	0.00058	0.36575	1182	7.1
KRSV_29	260	3.906	0.042	0.2546	0.0031	0.1102	0.001	0.48174	1462	16
KRSV_30	154.1	4.438	0.032	0.3044	0.0019	0.1051	0.00061	0.32155	1713	9.4
KRSV_31	107.7	3.806	0.034	0.2717	0.0021	0.1007	0.001	0.52443	1549	11
KRSV_32	163.3	2.536	0.042	0.2035	0.0018	0.0904	0.0014	0.41628	1194.3	9.6
KRSV_33	116.2	3.996	0.033	0.2907	0.0026	0.0996	0.001	0.51901	1645	13
KRSV_34	65.6	12.264	0.093	0.5149	0.0039	0.1726	0.0014	0.31593	2677	17
KRSV_35	185.5	4.782	0.049	0.2992	0.0039	0.11542	0.00087	0.50984	1687	19
KRSV_36	254	2.892	0.024	0.2345	0.0023	0.08929	0.00072	0.61491	1358	12
KRSV_37	179.2	4.613	0.046	0.3088	0.0027	0.1075	0.0011	0.44672	1735	13
KRSV_38	183	5.487	0.048	0.3472	0.0032	0.11447	0.00065	0.2683	1921	15
KRSV_39	141	2.377	0.026	0.1963	0.0022	0.0872	0.00082	0.42884	1155	12
KRSV_40	246	2.366	0.023	0.2057	0.0024	0.08271	0.00082	0.64203	1206	13
KRSV_41	192.5	2.324	0.024	0.2038	0.0015	0.08255	0.00075	0.31238	1195.4	8.2
KRSV_42	92.7	2.836	0.027	0.2292	0.0023	0.08957	0.00077	0.51756	1330	12
KRSV_43	489	3.786	0.032	0.253	0.0033	0.1088	0.0012	0.73555	1454	17
KRSV_44	126.2	5.286	0.061	0.3357	0.0037	0.1147	0.00098	0.34437	1866	18
KRSV_45	301	7.84	0.1	0.3261	0.0052	0.1734	0.0014	0.42794	1823	26
KRSV_46	223.5	3.656	0.04	0.2487	0.0028	0.10596	0.00094	0.45643	1432	14
KRSV_47	141.9	2.859	0.034	0.2288	0.0029	0.0908	0.0015	0.74387	1328	15
KRSV_48	152.9	10.264	0.067	0.4697	0.003	0.15865	0.00096	0.45776	2482	13
KRSV_49	41.8	3.519	0.052	0.2599	0.0023	0.098	0.0015	0.12213	1489	12
KRSV_50	212.3	4.644	0.03	0.3118	0.0023	0.10788	0.00077	0.53799	1749	11
KRSV_51	207.2	4.561	0.03	0.3119	0.0014	0.10598	0.00073	0.4258	1750	7
KRSV_52	132.8	2.91	0.025	0.2392	0.0019	0.08817	0.00083	0.52231	1382.3	9.8
KRSV_53	272	2.92	0.031	0.2412	0.0027	0.08769	0.00073	0.3245	1393	14
KRSV_54	179.6	4.016	0.086	0.2557	0.0047	0.1134	0.0021	0.16252	1467	24
KRSV_55	202	3.747	0.071	0.2213	0.0058	0.1245	0.0015	0.73008	1287	30
KRSV_56	174	2.863	0.026	0.2367	0.002	0.08777	0.00074	0.56338	1371	11
KRSV_57	182	4.998	0.039	0.325	0.0024	0.11179	0.00061	0.53744	1814	12
KRSV_58	164.5	2.908	0.019	0.2426	0.0018	0.08719	0.00061	0.5506	1400.3	9.1
KRSV_59	166.3	3.002	0.027	0.2381	0.0019	0.09151	0.0009	0.47314	1377	10
KRSV_60	48.1	2.457	0.057	0.2162	0.0041	0.0825	0.0026	0.45535	1262	22
KRSV_61	201	13.684	0.062	0.5282	0.0026	0.18755	0.0009	0.58429	2734	11
KRSV_62	108.6	4.419	0.035	0.3062	0.0022	0.10409	0.00075	0.5147	1722	11
KRSV_63	315	4.677	0.058	0.3123	0.0048	0.10829	0.0009	0.57521	1752	24
KRSV_64	64.3	2.893	0.033	0.2386	0.0023	0.08739	0.00098	0.43353	1379	12
KRSV_65	93.6	4.521	0.046	0.3105	0.0037	0.1047	0.0015	0.66708	1743	18
KRSV_66	61.6	2.302	0.026	0.2086	0.0017	0.0799	0.0011	0.59317	1221.4	9.2
KRSV_67	53.2	10.147	0.085	0.448	0.0049	0.1642	0.0013	0.60271	2388	22
KRSV_68	113	2.854	0.041	0.2375	0.0026	0.0873	0.0012	0.38211	1374	14
KRSV_69	138.7	2.948	0.027	0.2415	0.0023	0.08844	0.00097	0.63699	1394	12
KRSV_70	206	2.895	0.03	0.2342	0.0026	0.08948	0.0007	0.47179	1356	14
KRSV_71	94.9	9.624	0.072	0.4526	0.0031	0.1547	0.0011	0.44252	2407	14
KRSV_72	332	2.061	0.026	0.1813	0.003	0.08218	0.0008	0.69723	1074	17
KRSV_73	118.3	4.618	0.038	0.3136	0.0022	0.10696	0.00082	0.4458	1758	11
KRSV_74	169.1	4.383	0.034	0.3021	0.002	0.10525	0.00077	0.38099	1701.4	9.9
KRSV_75	179.8	5.083	0.051	0.325	0.0033	0.11393	0.00083	0.40512	1814	16
KRSV_76	83	3.186	0.038	0.2529	0.0023	0.0916	0.0013	0.51757	1453	12
KRSV_77	169.2	4.558	0.063	0.2948	0.0047	0.1115	0.0011	0.34365	1665	23
KRSV_78	276	2.963	0.025	0.244	0.0021	0.08823	0.0006	0.48383	1407	11
KRSV_79	228.4	4.547	0.046	0.3092	0.0038	0.10717	0.00093	0.5786	1736	19
KRSV_80	41.7	2.025	0.036	0.1887	0.0022	0.079	0.0015	0.34178	1114	12
MGM01_2	795	1.245	0.022	0.1288	0.0022	0.06936	0.00067	0.43368	781	13
MGM01_3	172.7	1.343	0.012	0.14392	0.00098	0.06752	0.00065	0.4517	866.7	5.5
MGM01_4	348	4.383	0.054	0.285	0.0031	0.11096	0.00087	0.32476	1616	15
MGM01_5	803	1.0583	0.0089	0.11283	0.00082	0.06766	0.00041	0.22615	689.2	4.8
MGM01_6	382	1.288	0.013	0.1362	0.0012	0.06826	0.00062	0.33778	823.3	6.9
MGM01_7	122	1.313	0.014	0.1417	0.0013	0.06669	0.0008	0.42083	854.2	7.2
MGM01_8	397	1.324	0.016	0.1423	0.0017	0.06724	0.00047	0.28777	857.7	9.8
MGM01_9	377	1.331	0.015	0.1418	0.0023	0.0678	0.001	0.71836	854	13
MGM01_10	416	1.39	0.0098	0.1472	0.0013	0.06816	0.00054	0.66696	885.3	7.1
MGM01_11	426	1.035	0.012	0.1107	0.0012	0.06738	0.00073	0.4518	676.6	6.8
MGM01_12	606	1.132	0.026	0.1194	0.0031	0.06819	0.00081	0.27958	727	18
MGM01_13	226	1.174	0.012	0.1244	0.001	0.06842	0.00057	0.31905	756	5.9
MGM01_14	543	1.241	0.011	0.131	0.0017	0.06838	0.00073	0.6921	793.4	9.9
MGM01_15	492	1.346	0.015	0.1433	0.0014	0.06755	0.00037	0.15586	863.3	8.1
MGM01_16	582	1.306	0.031	0.1373	0.0029	0.0688	0.0013	0.38249	829	16
MGM01_17	890	1.284	0.014	0.1349	0.0016	0.0688	0.00053	0.42385	816.6	9.1
MGM01_18	170.9	1.331	0.012	0.142	0.0013	0.06766	0.00092	0.64045	855.9	7.5
MGM01_19	293	5.621	0.068	0.3454	0.0059	0.1168	0.0014	0.5474	1916	29
MGM01_20	270.7	1.295	0.017	0.1368	0.0014	0.06817	0.00061	0.16018	826.3	8
MGT01_1	472	0.723	0.014	0.0887	0.0016	0.0593	0.0014	0.34096	548.1	9.4
MGT01_2	46.4	9.74	0.15	0.438	0.0065	0.1611	0.0018	0.1925	2341	29
MGT01_3	62	1.63	0.022	0.1665	0.0018	0.0714	0.001	0.38541	993	10
MGT01_4	298	0.7453	0.008	0.09183	0.00067	0.0589	0.00061	0.34553	566.3	3.9
MGT01_5	202.9	0.946	0.017	0.1073	0.0015	0.0639	0.00099	0.34764	657.2	8.9
MGT01_6	167.8	1.8	0.016	0.1767	0.0012	0.07405	0.00076	0.31059	1048.7	6.3
MGT01_7	37.27	1.445	0.029	0.1505	0.0025	0.0703	0.0012	0.35866	904	14
MGT01_8	46.6	0.723	0.021	0.0888	0.0015	0.0597	0.0017	0.41698	548.1	9
MGT01_9	22.76	0.788	0.04	0.0946	0.0032	0.0612	0.0036	0.53163	582	19
MGT01_10	135	0.712	0.041	0.085	0.0031	0.0612	0.0022	-0.24669	526	19
MGT01_11	79.6	1.206	0.029	0.1182	0.0024	0.0746	0.0013	0.20309	720	14
MGT01_12	214.3	1.563	0.013	0.1606	0.0015	0.07071	0.00057	0.45405	960.2	8.2
MGT01_13	487.8	0.876	0.011	0.1046	0.0014	0.06058	0.00089	0.54272	641.1	8.3
MGT01_14	92.1	7.747	0.082	0.3864	0.0044	0.1458	0.0012	0.17647	2105	20
MGT01_15	61.9	0.788	0.023	0.0955	0.0013	0.0601	0.0017	0.15009	587.9	7.9
MGT01_16	166	10.72	0.28	0.4563	0.0055	0.172	0.0034	-0.24217	2422	24
MGT01_17	523	1.407	0.011	0.1495	0.0014	0.06838	0.00048	0.51542	897.8	7.8
MGT01_18	129.3	1.136	0.021	0.1228	0.0024	0.0667	0.0011	0.34119	746	14
MGT01_19	224	1.117	0.013	0.1238	0.0011	0.06532	0.00068	0.28904	752.1	6.2
MGT01_20	311	0.8082	0.0097	0.0967	0.0012	0.06071	0.0006	0.2528	595.2	6.8
MGT01_21	121.6	1.611	0.022	0.1596	0.0014	0.0733	0.001	0.29291	954.6	7.8
MGT01_22	989	0.251	0.0096	0.0289	0.0013	0.06285	0.00097	0.57302	183.9	8.1
MGT01_23	654.9	1.28	0.016	0.1382	0.0017	0.06698	0.00067	0.49544	834.5	9.4
MGT01_24	309.6	0.7628	0.0078	0.09283	0.00082	0.06015	0.00066	0.51775	572.2	4.8
MGT01_25	466	0.707	0.013	0.0805	0.0014	0.0629	0.00097	0.2852	499.3	8.5
MGT01_26	51.1	0.771	0.015	0.0937	0.0012	0.0593	0.0012	0.35475	578.5	7.1
MGT01_27	73.5	1.536	0.017	0.156	0.0016	0.07142	0.00097	0.55821	934.4	8.7
MGT01_28	97.7	1.454	0.036	0.1498	0.0031	0.0702	0.0018	0.26963	900	18
MGT01_29	173	0.643	0.068	0.0698	0.0061	0.0667	0.0023	-0.56385	435	37
MGT01_30	188.7	1.81	0.017	0.1734	0.0014	0.07597	0.00061	0.50572	1030.9	7.6
MGT01_31	101.3	0.719	0.02	0.0848	0.0016	0.0612	0.0018	0.46686	524.6	9.4
MGT01_33	239	8.879	0.088	0.4021	0.0043	0.1601	0.0015	0.43484	2179	20
MGT01_34	627	0.7077	0.0059	0.0854	0.00071	0.06005	0.00058	0.64839	528.3	4.2
MGT01_35	63.7	1.055	0.018	0.1209	0.0015	0.06354	0.00082	0.037953	735.8	8.6
MGT01_36	165	10.161	0.061	0.4523	0.0025	0.16195	0.00099	0.52186	2406	11
MGT01_37	38.6	1.652	0.033	0.1661	0.0025	0.0716	0.0014	0.076302	990	14
MGT01_38	145.1	1.505	0.015	0.1527	0.002	0.07143	0.00096	0.62207	916	11
MGT01_39	180	1.119	0.013	0.1241	0.0014	0.06545	0.00074	0.47731	755	8
MGT01_40	214	1.186	0.015	0.1299	0.0013	0.0664	0.00093	0.4329	787	7.3
MGT01_41	95.6	0.624	0.027	0.0707	0.0027	0.0631	0.0011	-0.31402	440	16
MGT01_42	48.2	1.201	0.024	0.1286	0.0017	0.0676	0.0012	0.079759	779.8	9.5
MGT01_43	242.3	4.983	0.084	0.3176	0.0049	0.113	0.0013	0.086709	1778	24
MGT01_45	297	0.659	0.012	0.082	0.0015	0.05846	0.00066	0.324	507.7	9
Session 3
GH1226_1	89.4	23.41	0.27	0.6447	0.0071	0.2589	0.0018	0.28028	3239	11
GH1226_2	30.4	3.73	0.14	0.1986	0.0071	0.1345	0.0022	0.24995	2164	28
GH1226_3	215	5.16	0.25	0.2094	0.0098	0.1777	0.0015	-0.1056	2630	14
GH1226_4	96.6	24.14	0.19	0.6675	0.0068	0.26	0.0021	-0.084781	3245	13
GH1226_5	230	7.65	0.18	0.3324	0.0086	0.1665	0.0013	0.47732	2523	13
GH1226_6	149.3	5.778	0.094	0.2382	0.0045	0.1744	0.0015	0.44869	2600	14
GH1226_7	375	7.68	0.18	0.3338	0.0074	0.1647	0.0013	0.18463	2503	13
GH1226_8	98.6	12.14	0.2	0.4778	0.007	0.1831	0.0012	0.039374	2681	11
GH1226_9	32.8	7.29	0.15	0.3819	0.007	0.1359	0.0028	0.43035	2171	36
GH1226_10	12.3	6.27	0.16	0.3346	0.0087	0.137	0.0037	0.53549	2176	46
GH1226_11	48.7	10.88	0.11	0.4605	0.0057	0.1718	0.0018	0.5725	2573	18
GH1226_12	58.9	7	0.12	0.3692	0.0052	0.1368	0.0018	0.32628	2187	22
GH1226_13	41.4	7.088	0.074	0.3771	0.0037	0.1359	0.0014	0.57052	2176	18
GH1226_14	67.5	7.596	0.087	0.4024	0.0048	0.1369	0.0014	0.46849	2189	19
GH1226_15	276	7.338	0.053	0.3864	0.0031	0.1377	0.00085	0.45979	2198	11
GH1226_16	90.4	7.52	0.055	0.4011	0.003	0.1367	0.001	0.6155	2188	14
GH1226_17	48.6	5.76	0.15	0.313	0.0079	0.1336	0.0016	0.20705	2146	21
GH1226_18	152	7.584	0.07	0.4018	0.0038	0.1375	0.0011	0.48185	2198	13
GH1226_19	242	17.69	0.34	0.4497	0.0097	0.2878	0.0015	0.07026	3405.2	7.9
GH1226_20	183	10.878	0.062	0.4783	0.0028	0.16608	0.00097	0.60678	2517.9	9.8
GH1226_21	77.6	6.37	0.2	0.339	0.01	0.1374	0.0015	0.29743	2193	18
GH1226_22	104.8	7.464	0.056	0.3964	0.0029	0.1374	0.0011	0.38445	2193	14
GH1226_23	109.6	7.352	0.061	0.3942	0.0031	0.136	0.0012	0.5103	2178	16
GH1226_24	107.4	6.55	0.19	0.348	0.01	0.137	0.001	0.16241	2190	13
GH1226_25	7.2	6.87	0.33	0.288	0.013	0.1691	0.0052	0.11959	2545	55
GH1226_26	128.4	7.587	0.06	0.3998	0.0029	0.1378	0.0011	0.39099	2200	14
GH1226_27	27.36	7.135	0.097	0.3799	0.0043	0.1372	0.0021	0.4964	2187	27
GH1226_28	154.6	9.167	0.096	0.3962	0.0043	0.1686	0.0013	0.22883	2543	12
GH1226_29	122.1	4.75	0.17	0.2635	0.0091	0.1317	0.0014	0.14496	2119	19
GH1226_30	236.8	14.99	0.11	0.5298	0.0044	0.20605	0.00092	0.37219	2874.4	7.3
GH1226_31	34.8	5.72	0.15	0.3002	0.0074	0.1384	0.002	0.2181	2210	26
GH1226_32	409	7.85	0.25	0.34	0.011	0.1675	0.0012	-0.1864	2534	12
GH1226_33	149.2	7.035	0.073	0.3749	0.0043	0.1363	0.001	0.49567	2180	13
GH1226_34	82.4	6.34	0.1	0.3381	0.0057	0.1365	0.0011	0.19775	2182	13
GH1226_35	135.4	6.82	0.13	0.363	0.0074	0.1363	0.0012	0.20303	2181	15
GH1226_36	212.7	11.31	0.18	0.4618	0.008	0.1786	0.0014	0.41995	2639	13
GH1226_37	82.8	10.814	0.097	0.4491	0.0047	0.1752	0.0014	0.49035	2606	14
GH1226_38	35	5.89	0.11	0.3121	0.0052	0.1382	0.0017	0.057041	2202	21
GH1226_39	138.3	25.17	0.19	0.6598	0.0053	0.2773	0.0019	0.51886	3347	11
GH1226_40	23.57	9.98	0.3	0.402	0.01	0.179	0.003	-0.064692	2638	27
GH1226_41	122	10.23	0.16	0.4341	0.0067	0.1718	0.0014	-0.052365	2574	13
GH1226_42	68.9	6.948	0.073	0.3744	0.0035	0.1351	0.0014	0.19271	2168	18
GH1226_43	80.4	7.426	0.074	0.3942	0.004	0.1374	0.0014	0.43611	2194	17
GH1226_44	161	9.36	0.37	0.408	0.01	0.1667	0.0032	-0.82741	2517	34
GH1226_46	93.4	7.364	0.063	0.3927	0.0033	0.1369	0.0014	0.27404	2190	18
GH1226_47	72.8	7.332	0.062	0.3891	0.0038	0.1373	0.0014	0.52326	2194	17
GH1226_48	87.5	20.35	0.35	0.5637	0.0093	0.2604	0.0027	-0.44413	3247	17
GH1226_49	70.36	7.649	0.088	0.3998	0.0051	0.139	0.002	0.57547	2211	25
GH1226_50	27.1	5.51	0.15	0.3091	0.0061	0.1304	0.0027	0.20151	2102	38
GH1226_51	46.4	6.84	0.11	0.3674	0.0057	0.1345	0.002	0.57253	2155	26
GH1226_52	111.2	6.974	0.075	0.3711	0.0041	0.1362	0.0013	0.47549	2182	17
GH1226_53	121.7	11.282	0.07	0.4913	0.0034	0.1664	0.0012	0.60296	2521	12
GH1226_54	81.4	9.97	0.13	0.427	0.0047	0.1692	0.0016	0.12966	2548	16
GH1226_55	297	10.885	0.075	0.47	0.0038	0.167	0.0011	0.47139	2527	11
GH1226_56	175	7.397	0.083	0.393	0.0044	0.1366	0.00089	0.43241	2184	11
GH1226_57	71.2	11.03	0.14	0.4655	0.0066	0.1715	0.002	0.47638	2576	20
GH1226_58	39.5	7.56	0.11	0.3863	0.0052	0.1402	0.0022	0.36349	2231	27
GH1226_59	271	0.6058	0.0083	0.0774	0.001	0.05714	0.00099	0.56713	502	38
GH1226_60	40	10.95	0.18	0.4497	0.0064	0.1757	0.0021	0.17369	2617	20
Standards
Primary
Z_GJ1_1	314.9	0.818	0.0058	0.09852	0.00055	0.06012	0.00044	0.41291	605.7	3.2
Z_GJ1_2	274.3	0.8046	0.0078	0.09689	0.00065	0.06009	0.00062	0.090312	596.1	3.8
Z_GJ1_3	283	0.8139	0.0066	0.09779	0.00054	0.06044	0.00049	0.36692	601.4	3.2
Z_GJ1_4	290.2	0.7997	0.007	0.09703	0.00067	0.05986	0.00057	0.45502	597	4
Z_GJ1_5	285.1	0.8071	0.0062	0.09752	0.00063	0.0599	0.00049	0.48071	599.8	3.7
Z_GJ1_6	289.2	0.8098	0.0065	0.09694	0.00062	0.06055	0.00054	0.42308	596.4	3.6
Z_GJ1_7	286.1	0.8019	0.0062	0.09743	0.00066	0.05986	0.00046	0.51231	599.3	3.9
Z_GJ1_8	289	0.8166	0.0068	0.09884	0.00061	0.0602	0.00054	0.48623	607.6	3.6
Z_GJ1_9	288.7	0.8082	0.0055	0.09696	0.00065	0.06017	0.00048	0.54992	596.6	3.8
Z_GJ1_10	285	0.8102	0.0063	0.09807	0.00062	0.05991	0.00052	0.48185	603	3.6
Z_GJ1_11	286.1	0.8151	0.0075	0.09751	0.00073	0.0606	0.00058	0.48635	599.8	4.3
Z_GJ1_12	288.3	0.8056	0.0061	0.09743	0.00062	0.05996	0.00053	0.54588	599.8	3.6
Z_GJ1_13	286.6	0.8035	0.0068	0.0971	0.00063	0.05976	0.00052	0.35227	597.4	3.7
Z_GJ1_14	286.6	0.8063	0.0071	0.09745	0.00061	0.06003	0.00054	0.47946	599.4	3.6
Z_GJ1_15	286.6	0.811	0.0073	0.09788	0.00058	0.06037	0.0006	0.36558	601.9	3.4
Z_GJ1_16	290.9	0.8151	0.0062	0.09777	0.00068	0.06024	0.00055	0.59101	601.3	4
Z_GJ1_17	282.6	0.8081	0.0069	0.09724	0.00068	0.06065	0.00054	0.47931	598.2	4
Z_GJ1_18	291.4	0.8114	0.007	0.0978	0.0008	0.06034	0.0005	0.42539	601.5	4.7
Z_GJ1_19	283.3	0.8159	0.0069	0.09895	0.0007	0.06025	0.00053	0.40429	608.2	4.1
Z_GJ1_20	287.4	0.8068	0.0067	0.09729	0.00065	0.05995	0.00052	0.42283	598.5	3.8
Z_GJ1_21	286.9	0.8152	0.007	0.09866	0.00063	0.06014	0.00061	0.46234	606.5	3.7
Z_GJ1_22	287.8	0.8064	0.0067	0.09795	0.00075	0.05985	0.00061	0.5476	602.3	4.4
Z_GJ1_23	286	0.8035	0.0063	0.09655	0.00061	0.06023	0.00051	0.44061	594.1	3.6
Z_GJ1_24	287.5	0.8086	0.0061	0.0969	0.00067	0.06044	0.00054	0.59327	596.2	3.9
Z_GJ1_25	286.9	0.8077	0.0073	0.09737	0.00064	0.06006	0.00049	0.3577	598.9	3.7
Z_GJ1_26	287	0.8092	0.0059	0.0969	0.0007	0.06035	0.0006	0.66726	596.2	4.1
Z_GJ1_27	286.5	0.7982	0.0067	0.0964	0.00064	0.05985	0.00053	0.24808	593.2	3.8
Z_GJ1_28	288.9	0.8098	0.0058	0.09724	0.00072	0.06052	0.00057	0.63393	598.8	4.3
Z_GJ1_29	285.3	0.8207	0.0075	0.09877	0.00066	0.06047	0.0006	0.45594	607.2	3.9
Z_GJ1_30	288.1	0.8146	0.0074	0.09767	0.00067	0.06061	0.00057	0.43573	600.7	3.9
Z_GJ1_31	286.2	0.8144	0.0073	0.09833	0.00076	0.06011	0.00057	0.55076	604.6	4.4
Z_GJ1_32	284.2	0.8042	0.0068	0.0969	0.00063	0.05995	0.00055	0.42803	596.2	3.7
Z_GJ1_33	297.5	0.8016	0.0074	0.09736	0.0008	0.05984	0.00065	0.49647	598.9	4.7
Z_GJ1_34	277.1	0.889	0.01	0.10591	0.00081	0.0608	0.0007	0.38092	648.9	4.7
Z_GJ1_35	298.7	0.7912	0.006	0.09628	0.00069	0.05928	0.00054	0.6456	592.5	4.1
Z_GJ1_36	284.1	0.8047	0.0064	0.09663	0.00056	0.0596	0.00047	0.29847	594.6	3.3
Z_GJ1_37	287.2	0.8057	0.0074	0.09556	0.0007	0.06079	0.00051	0.42605	588.3	4.1
Z_GJ1_38	287	0.7998	0.0073	0.09718	0.0007	0.05969	0.00054	0.49217	597.8	4.1
Z_GJ1_39	286.6	0.8087	0.007	0.09762	0.00079	0.0598	0.00063	0.67017	600.4	4.6
Z_GJ1_40	288.1	0.8236	0.0066	0.09868	0.0006	0.06033	0.00056	0.43482	606.6	3.5
Z_GJ1_41	285.7	0.8196	0.0073	0.09881	0.00069	0.05992	0.00055	0.32059	607.4	4
Z_GJ1_42	287.9	0.8071	0.0066	0.09769	0.00073	0.06005	0.00054	0.46456	600.9	4.3
Z_GJ1_43	286.4	0.8015	0.0072	0.09698	0.00069	0.05995	0.00062	0.56804	596.7	4.1
Z_GJ1_44	287.2	0.8031	0.0068	0.09696	0.00073	0.05985	0.00068	0.57726	596.6	4.3
Z_GJ1_45	287	0.8064	0.0066	0.09681	0.00071	0.06019	0.00049	0.42915	595.6	4.2
Z_GJ1_46	287.3	0.8163	0.0067	0.09761	0.00064	0.0603	0.00055	0.47096	600.4	3.7
Z_GJ1_47	285.9	0.8125	0.0061	0.09879	0.00078	0.05971	0.00058	0.57104	607.3	4.6
Z_GJ1_48	288.5	0.7976	0.0074	0.0963	0.00063	0.0603	0.0006	0.39696	592.7	3.7
Z_GJ1_49	286.3	0.8136	0.0076	0.09842	0.00067	0.06017	0.00065	0.47752	605.1	3.9
Z_GJ1_50	287.5	0.8107	0.0068	0.09778	0.0006	0.06035	0.00058	0.41367	601.4	3.5
Z_GJ1_51	286.1	0.8135	0.0061	0.09768	0.00056	0.06062	0.00049	0.52781	600.8	3.3
Z_GJ1_52	287.7	0.7966	0.0072	0.09674	0.00066	0.05976	0.0006	0.47778	595.3	3.9
Z_GJ1_53	287	0.8067	0.0066	0.09671	0.00056	0.06095	0.00056	0.49312	595.1	3.3
Z_GJ1_54	286.3	0.8091	0.0068	0.098	0.00065	0.06013	0.00054	0.50183	602.7	3.8
Z_GJ1_55	288.4	0.8182	0.007	0.09858	0.00065	0.06025	0.00058	0.4156	606	3.8
Z_GJ1_56	285.3	0.8255	0.007	0.09933	0.00069	0.06058	0.00057	0.45385	610.4	4.1
Z_GJ1_57	287.7	0.8033	0.0074	0.09787	0.00062	0.05983	0.00069	0.55364	601.9	3.7
Z_GJ1_58	285.9	0.8043	0.0071	0.09719	0.00066	0.05986	0.00063	0.57937	597.9	3.9
Z_GJ1_59	289.4	0.8001	0.0073	0.09694	0.0006	0.05971	0.00055	0.45287	596.4	3.5
Z_GJ1_60	285.6	0.8083	0.0075	0.09723	0.00077	0.06011	0.00052	0.4248	598.1	4.5
Z_GJ1_61	287.6	0.8121	0.0071	0.09739	0.00075	0.06077	0.00066	0.57646	599	4.4
Z_GJ1_62	286.5	0.8119	0.0065	0.09796	0.00064	0.05979	0.00058	0.60691	602.4	3.8
Z_GJ1_63	287.8	0.8123	0.0079	0.09755	0.00066	0.06044	0.00061	0.44204	600	3.8
Z_GJ1_64	285.4	0.8094	0.0078	0.09734	0.00077	0.06014	0.00059	0.43694	598.7	4.5
Z_GJ1_65	287.7	0.8021	0.006	0.09738	0.00064	0.0598	0.0005	0.48286	599	3.7
Z_GJ1_66	287.1	0.8042	0.0068	0.09752	0.00066	0.05987	0.00062	0.54484	599.9	3.8
Z_GJ1_67	287.4	0.8161	0.0066	0.09733	0.00064	0.0602	0.00056	0.48467	598.7	3.8
Z_GJ1_68	285.4	0.8124	0.0078	0.09805	0.00067	0.0598	0.0006	0.52054	603.4	3.8
Z_GJ1_69	288	0.8121	0.0069	0.09816	0.00065	0.06021	0.00052	0.33793	603.6	3.8
Z_GJ1_70	288.6	0.8117	0.0073	0.09798	0.00067	0.06	0.00065	0.5921	602.6	3.9
Z_GJ1_71	286.1	0.8104	0.0074	0.09716	0.00069	0.06055	0.0005	0.40123	597.7	4
Z_GJ1_72	287.2	0.8047	0.0063	0.09786	0.0006	0.05986	0.00054	0.5821	602.4	3.4
Z_GJ1_73	287	0.8109	0.0077	0.09814	0.00067	0.0597	0.00058	0.41274	603.5	3.9
Z_GJ1_74	287	0.8089	0.0069	0.09698	0.00056	0.06072	0.00049	0.35727	596.6	3.3
Z_GJ1_75	288.1	0.822	0.011	0.0993	0.0013	0.06047	0.00087	0.52966	623	31
Z_GJ1_76	283	0.812	0.013	0.0984	0.0014	0.0599	0.0011	0.50462	595	40
Z_GJ1_77	290.9	0.814	0.011	0.0976	0.001	0.0604	0.0011	0.59132	624	36
Z_GJ1_78	285.5	0.818	0.012	0.0992	0.0013	0.05992	0.00092	0.49136	604	33
Z_GJ1_79	287	0.803	0.012	0.0956	0.0014	0.0614	0.0011	0.53973	649	38
Z_GJ1_80	288.3	0.8	0.012	0.0979	0.001	0.0598	0.00098	0.51238	593	36
Z_GJ1_81	285.6	0.802	0.01	0.0968	0.0012	0.0602	0.0011	0.73482	602	38
Z_GJ1_82	285.3	0.809	0.011	0.0975	0.0013	0.06023	0.00079	0.46671	616	28
Z_GJ1_83	285.9	0.801	0.012	0.0976	0.0013	0.0596	0.0012	0.61566	588	42
Z_GJ1_84	287.3	0.815	0.011	0.0979	0.0012	0.06062	0.00086	0.53329	621	31
Z_GJ1_85	290.2	0.822	0.013	0.1	0.0012	0.0598	0.001	0.4208	590	36
Z_GJ1_86	292.3	0.808	0.01	0.0979	0.0013	0.05948	0.00088	0.56905	591	32
Z_GJ1_87	290.5	0.808	0.011	0.0979	0.00098	0.05988	0.00086	0.40245	606	32
Z_GJ1_88	287.1	0.813	0.012	0.0962	0.0012	0.0611	0.001	0.46245	635	36
Z_GJ1_89	290.8	0.813	0.011	0.0981	0.0013	0.0602	0.001	0.6265	602	36
Z_GJ1_90	272.4	0.786	0.012	0.09484	0.00097	0.06026	0.00094	0.33642	606	34
Z_GJ1_91	288.5	0.828	0.012	0.0994	0.0014	0.0601	0.001	0.52755	603	37
Z_GJ1_92	294.4	0.811	0.014	0.0977	0.0011	0.0608	0.0011	0.47218	632	40
Z_GJ1_93	279	0.827	0.012	0.098	0.0014	0.0605	0.0012	0.59557	623	41
Z_GJ1_94	293.2	0.808	0.011	0.0971	0.0015	0.06004	0.00099	0.62085	598	36
Z_GJ1_95	290.3	0.796	0.012	0.0975	0.0013	0.0594	0.0011	0.55387	591	37
Z_GJ1_96	289.1	0.805	0.011	0.0975	0.0011	0.0597	0.001	0.57023	591	35
Z_GJ1_97	284.8	0.796	0.013	0.0969	0.001	0.05917	0.00096	0.49332	572	34
Z_GJ1_98	278.8	0.805	0.012	0.0972	0.0012	0.05995	0.00096	0.471	608	34
Z_GJ1_99	287.3	0.796	0.012	0.0973	0.0012	0.06008	0.00096	0.45096	600	35
Z_GJ1_100	283.4	0.83	0.011	0.0999	0.0011	0.06028	0.00085	0.45425	608	30
Z_GJ1_101	287.6	0.803	0.012	0.0974	0.0013	0.0599	0.0011	0.50474	590	38
Z_GJ1_102	292.2	0.803	0.012	0.0972	0.0013	0.0595	0.001	0.5542	596	37
Z_GJ1_103	281.9	0.815	0.014	0.0992	0.001	0.0597	0.0012	0.47116	598	42
Z_GJ1_104	286.4	0.806	0.013	0.0968	0.001	0.06018	0.00087	0.32983	605	32
Z_GJ1_105	284.1	0.812	0.012	0.0969	0.0011	0.06053	0.00099	0.49974	621	36
Z_GJ1_106	292.2	0.796	0.013	0.0965	0.0012	0.0602	0.0011	0.45593	603	40
Z_GJ1_107	287.3	0.805	0.013	0.097	0.0012	0.0601	0.0011	0.51739	610	40
Z_GJ1_108	282.4	0.804	0.011	0.0968	0.0011	0.06079	0.00095	0.57546	634	34
Z_GJ1_109	286.6	0.813	0.01	0.0972	0.0014	0.06085	0.00093	0.62986	632	32
Z_GJ1_110	280.2	0.82	0.013	0.0983	0.0011	0.06024	0.00098	0.47189	614	37
Z_GJ1_111	297.7	0.828	0.012	0.1013	0.0014	0.0595	0.001	0.56164	583	37
Z_GJ1_112	281.2	0.817	0.012	0.0988	0.0013	0.06042	0.00096	0.42502	616	34
Z_GJ1_113	283.7	0.797	0.015	0.0972	0.0014	0.0598	0.0011	0.14242	585	41
Z_GJ1_114	284.8	0.818	0.012	0.0983	0.001	0.06	0.001	0.55124	608	37
Z_GJ1_115	288.9	0.807	0.012	0.0977	0.0011	0.06	0.0011	0.56279	604	38
Z_GJ1_116	287.6	0.81	0.01	0.0962	0.0012	0.06086	0.00095	0.62834	633	33
Z_GJ1_117	287.6	0.808	0.012	0.0971	0.0013	0.0598	0.0011	0.53528	597	40
Z_GJ1_118	285.8	0.81	0.013	0.0981	0.0012	0.06	0.001	0.55647	603	36
Secondary
Pak1_1	204.4	0.0459	0.0028	0.00728	0.00021	0.0468	0.0031	0.36919	50	120
Pak1_9	206.8	0.0505	0.0031	0.00713	0.00025	0.0506	0.0032	0.38583	200	120
Pak1_10	150.1	0.0499	0.0043	0.0074	0.00025	0.0499	0.0044	-0.024646	140	150
Pak1_11	152.4	0.0469	0.0033	0.00716	0.00023	0.0474	0.0031	0.16871	70	120
Pak1_12	145.5	0.0444	0.0039	0.00716	0.0003	0.0473	0.0048	0.51798	70	180
Pak1_13	226.6	0.0448	0.0029	0.00714	0.00021	0.0469	0.0031	0.33864	50	120
Pak1_14	141.7	0.0513	0.0028	0.00746	0.00025	0.049	0.003	0.4634	170	120
Pak1_15	190.1	0.0505	0.0035	0.00743	0.00023	0.0501	0.004	0.61864	150	150
Pak1_16	143.5	0.0457	0.0032	0.00733	0.00027	0.0458	0.0036	0.52549	0	140
Pak1_17	191	0.0488	0.0025	0.0072	0.00023	0.0504	0.0032	0.42532	220	120
Pak1_2	207.3	0.0479	0.0029	0.00759	0.00024	0.0461	0.0033	0.57526	10	130
Pak1_18	180.6	0.0478	0.003	0.0077	0.00023	0.0458	0.003	0.46956	20	120
Pak1_19	183.7	0.0488	0.0032	0.0071	0.00021	0.0512	0.0038	0.43914	240	140
Pak1_20	193.2	0.0504	0.0028	0.00742	0.00025	0.0501	0.0034	0.50444	180	130
Pak1_21	203	0.051	0.003	0.00714	0.00028	0.0533	0.0035	0.53756	320	130
Pak1_22	197.1	0.0486	0.0031	0.00718	0.0002	0.0486	0.0031	0.27454	150	120
Pak1_23	176.4	0.0472	0.0028	0.00747	0.00024	0.0452	0.0029	0.4931	-20	110
Pak1_24	158.9	0.0522	0.0035	0.00715	0.00028	0.0527	0.0039	0.44856	270	150
Pak1_25	145.4	0.0566	0.0042	0.00735	0.00029	0.0536	0.0044	0.47613	310	160
Pak1_26	180.7	0.0491	0.0031	0.0073	0.00024	0.049	0.0033	0.30859	140	130
Pak1_27	160.9	0.0501	0.0039	0.00726	0.00028	0.0488	0.004	0.37048	190	150
Pak1_3	231.6	0.0466	0.0026	0.00755	0.0002	0.0457	0.0027	0.29986	10	110
Pak1_28	148.2	0.053	0.0043	0.00738	0.00027	0.0515	0.0046	0.55804	230	160
Pak1_29	142.6	0.0523	0.0049	0.00731	0.00027	0.0538	0.0055	-0.017593	220	170
Pak1_30	144.1	0.0508	0.004	0.00706	0.00025	0.0514	0.0046	0.36792	230	170
Pak1_31	145.6	0.0526	0.0035	0.00737	0.00027	0.0511	0.0035	0.42553	220	130
Pak1_32	140.4	0.0539	0.0041	0.0076	0.00029	0.0527	0.0047	0.50743	230	170
Pak1_33	292	0.0479	0.0025	0.00718	0.00022	0.0485	0.0027	0.51745	130	110
Pak1_34	260	0.0494	0.0027	0.00723	0.00022	0.0491	0.0031	0.41064	160	120
Pak1_35	155.1	0.0513	0.0038	0.0077	0.00024	0.0488	0.0039	0.50497	160	150
Pak1_36	149.9	0.0481	0.0036	0.00751	0.00026	0.0475	0.0038	0.35688	80	150
Pak1_37	132.1	0.0471	0.004	0.00765	0.00031	0.0464	0.0045	0.5103	40	170
Pak1_4	225.4	0.048	0.0032	0.00737	0.00022	0.0473	0.0037	0.56086	90	150
Pak1_38	258.4	0.0462	0.0024	0.00718	0.00018	0.0472	0.0024	0.20644	70	97
Pak1_39	276	0.0463	0.0019	0.00759	0.00019	0.045	0.0021	0.44952	-18	86
Pak1_5	206.1	0.0514	0.0028	0.00716	0.00022	0.0528	0.0034	0.46196	310	130
Pak1_6	232.6	0.0508	0.0025	0.00719	0.00019	0.0508	0.0031	0.52189	240	120
Pak1_7	225.7	0.0512	0.0029	0.0074	0.00022	0.0514	0.0032	0.44563	270	120
Pak1_8	193.6	0.05	0.0027	0.00713	0.00023	0.0515	0.0033	0.43735	230	120
Z_Plesovice_1	616	0.4061	0.003	0.05508	0.00044	0.05367	0.00044	0.6239	345.6	2.7
Z_Plesovice_2	609	0.3998	0.0032	0.05496	0.00034	0.05286	0.00044	0.41591	344.9	2.1
Z_Plesovice_3	592	0.4025	0.0028	0.05512	0.00041	0.0532	0.00044	0.55993	345.9	2.5
Z_Plesovice_4	576	0.4062	0.0044	0.05542	0.00036	0.05348	0.00047	0.2225	347.7	2.2
Z_Plesovice_5	851	0.4092	0.0047	0.05595	0.00059	0.05341	0.00043	0.37958	350.9	3.6
Z_Plesovice_6	615	0.4161	0.0038	0.05581	0.0004	0.05412	0.00044	0.27615	350.1	2.4
Z_Plesovice_7	747	0.3996	0.004	0.05455	0.00041	0.053	0.0005	0.24119	342.4	2.5
Z_Plesovice_8	590	0.4031	0.0037	0.05483	0.00045	0.05275	0.00044	0.35207	344.1	2.8
Z_Plesovice_9	742	0.4043	0.0041	0.05541	0.00051	0.05306	0.00049	0.343	347.6	3.1
Z_Plesovice_10	833	0.4049	0.0041	0.05557	0.00043	0.05289	0.00041	0.35326	348.6	2.6
Z_Plesovice_11	638	0.4018	0.0038	0.05492	0.00051	0.05332	0.00048	0.42025	344.6	3.1
Z_Plesovice_12	899	0.4	0.0035	0.05459	0.0004	0.05341	0.00041	0.24952	342.6	2.5
Z_Plesovice_13	875	0.4014	0.0037	0.05467	0.0004	0.05329	0.00035	0.25615	343.1	2.4
Z_Plesovice_14	752	0.3976	0.0037	0.05446	0.00044	0.05309	0.00045	0.49676	341.8	2.7
Z_Plesovice_15	616	0.4008	0.0042	0.05457	0.0005	0.05354	0.00051	0.41621	342.5	3

## Sheet: Table S2. TE data
Sample	Name	Pb76Age	Pb76Age1s	La	La_2s	Ce	Ce_2s	Pr	Pr_2s	Nd	Nd_2s	Sm	Sm_2s	Eu	Eu_2s	Gd	Gd_2s	Tb	Tb_2s	Dy	Dy_2s	Ho	Ho_2s	Er	Er_2s	Tm	Tm_2s	Yb	Yb_2s	Lu	Lu_2s	Hf	Hf_2s	Ta	Ta_2s	Th	Th_2s	U	U_2s	Ti	Ti_2s	Y	Y_2s
GH1226	GH1226_1	3239	11	0.023	0.0215137	14	0.93	0.233	0.035	3.94	0.57	7.21	0.93	2.99	0.34	29	3.83658	7.49	0.67	82.5	6.3	26.1	0.4959	110.6	7.6	25.7	1.7	246	15	36.7	0.8074	160	0.09631	0.293	0.072	125	12	162.5	9.7	8.6	2.1	759	55
GH1226	GH1226_2	2164	28	0.057	0.0209783	7.38	0.5	0.87	0.1	8.7	0.91	12.5	1.5	3.91	0.51	40.2	6.72548	10.21	0.99	110	11	30.2	0.7248	119	10	26.3	2.2	242	17	30	0.66	380	0.083938	0.7	0.11	30.7	3.8	52.3	5.5	24.6	2.5	827	66
GH1226	GH1226_5	2523	13	0.35	0.113533	45.7	1.7	5.13	0.55	37	3.3	36.3	8.1	9.8	1.1	75.9	6.50025	18.2	1.3	172	10	47.2	1.18	179.6	9.2	39.7	1.7	364	11	45.9	1.0557	280	0.080258	1.3	0.14	641	37	440	36	27	13	1322	69
GH1226	GH1226_9	2171	36	0.092	0.0692573	11.74	0.97	0.76	0.19	6.5	1.4	8.4	1.6	1.89	0.65	26.2	2.93284	7.56	0.64	87.9	6.8	27.6	0.4416	117.1	6.1	26.8	1.5	258	15	31.3	0.3756	270	0.095335	2.59	0.19	46.4	2.7	72.5	5.8	14	2.1	752	42
GH1226	GH1226_10	2176	46	0.043	0.0566084	5.31	0.45	0.331	0.078	4.02	0.52	6.93	0.77	0.88	0.21	26.1	4.176	7.5	0.73	82.5	7.9	25.2	0.5544	103.5	8.4	22.5	1.8	205	17	28.8	0.576	160	0.057558	0.7	0.15	16.5	1.3	22.1	2	22	2.1	677	53
GH1226	GH1226_11	2573	18	0.016	0.0108992	19.43	0.65	0.253	0.029	2.98	0.26	5.05	0.52	1.02	0.13	18.6	1.47036	5.54	0.3	67.6	3.8	22.8	0.2964	102.6	5.9	25.3	1	255.4	9.6	35.1	0.5616	270	0.097077	0.5	0.12	47.9	2	75.6	3.8	14.7	2	651	34
GH1226	GH1226_12	2187	22	3.3	11.8692	11.3	6.9	1.8	2.6	4.7	4	3.7	1.6	0.8	0.48	13.4	1.34775	4	0.9	47	7	15.8	0.2528	71.4	4.5	17.3	0.87	167.9	7.5	22.75	0.19565	170	0.048002	0.99	0.13	31.1	1.7	89.6	4.8	14.6	1.7	466	49
GH1226	GH1226_13	2176	18	0.021	0.00667575	26.15	0.77	1.559	0.082	23.37	0.8	30.8	1.6	2	0.18	101.9	5.00891	26.32	0.7	275.6	7.1	80.4	1.608	314.8	7.7	65.1	1.6	553	13	73	1.241	180	0.098459	3.02	0.22	109.3	3	70.7	2	14.7	2.1	2087	43
GH1226	GH1226_14	2189	19	6.2	14.7523	28	16	2.9	2.3	17	12	8.8	2.7	1.24	0.39	27.8	2.64762	7.93	0.62	86.4	4.8	27.8	0.3336	115.3	5	25.2	1.2	221	9.2	29.8	0.3278	180	0.05374	1.95	0.17	66.6	2.1	123.4	5.4	11.1	1.9	753	32
GH1226	GH1226_15	2198	11	0.7	0.590774	39.8	2.9	2.09	0.42	16.4	2.5	20.2	2.1	3.12	0.56	65.3	4.50345	18.41	0.92	199.6	8.8	60.1	1.3823	243.2	8.7	52.2	1.8	459	14	57.7	1.154	200	0.13758	8.38	0.35	306	12	459	16	9.5	1.4	1609	49
GH1226	GH1226_16	2188	14	0.0061	0.0027778	12.77	0.97	0.46	0.033	8.31	0.55	14.67	0.96	0.795	0.081	57.9	6.11312	17.5	0.74	204.5	9.6	67.9	2.3086	298	15	66.3	3.5	600	31	81.6	2.856	110	0.056242	2.01	0.24	103.4	8.8	164	16	10.6	1.7	1918	86
GH1226	GH1226_17	2146	21	0.12	0.0632856	11.58	0.94	1.12	0.17	11.38	0.96	17.8	1.4	4.18	0.65	64.3	4.0098	17.26	0.68	180.7	6.6	53.2	1.0108	212.9	7.1	44.9	1.4	391	14	50.6	0.6072	150	0.10044	1.09	0.2	59.4	3.8	81.9	6.1	24.3	2.6	1491	43
GH1226	GH1226_18	2198	13	0.023	0.0138598	3.09	0.6	0.362	0.048	5.01	0.61	8.5	1	0.8	0.19	34	7.09202	9.77	0.95	127	14	43.6	1.962	200	21	48.9	5.1	491	55	64.4	3.9928	200	0.1473	0.371	0.093	70.4	8.2	191	31	13.8	2.2	1210	130
GH1226	GH1226_19	3405.2	7.9	0.49	0.162338	44.5	2.8	5.46	0.64	37.5	4.4	39.3	4.6	17.8	2.3	103	12.5165	24	2.6	205	20	49.5	2.1285	183	12	39.5	2.4	363	19	48.6	0.972	160	0.13234	1.17	0.16	222	9.9	394	21	20.7	2.3	1460	110
GH1226	GH1226_20	2517.9	9.8	0.0071	0.00423941	17.4	1.1	0.128	0.037	1.5	0.13	3.3	0.4	0.617	0.093	14	0.958315	4.57	0.21	57.5	2	20.06	0.132396	93.7	3.1	22.79	0.78	221	10	32.4	0.3564	250	0.15509	0.75	0.13	151.4	9.6	266	22	11.2	1.6	595	14
GH1226	GH1226_21	2193	18	0.28	0.170899	13	1.4	1.64	0.3	14.6	2	17.7	2.2	4.27	0.87	60.6	4.05039	15.4	0.8	164.7	7.1	47	0.846	188	5.3	38.9	1.3	336	10	44.6	0.4906	110	0.14224	1.27	0.14	76.9	3.4	127	10	22.1	3.2	1295	51
GH1226	GH1226_22	2193	14	4.2	11.4441	20.7	8.5	1.6	1.2	13.1	6.1	16	1.7	1.25	0.13	64.7	3.53828	17.95	0.57	204	4.5	62.2	1.0574	250.6	7.1	51.2	1.4	436	12	56.3	0.9571	230	0.076849	1.68	0.15	122.9	3.6	159.9	5.5	12.1	1.8	1667	32
GH1226	GH1226_23	2178	16	0.27	0.279771	11.47	0.69	0.592	0.069	6.37	0.49	9.23	0.82	0.6	0.1	34.8	3.11642	9.63	0.48	111	5.1	35.5	0.568	151.2	6.5	33.5	1.5	309	14	42.1	0.7157	140	0.14258	0.793	0.096	107.9	6.3	167.7	6.9	21.9	5.5	1004	43
GH1226	GH1226_24	2190	13	2	3.11405	20.5	5.3	1.88	0.76	13.5	3.9	14.2	2	2.54	0.73	51.6	8.55249	13.7	1.3	144	12	42.4	1.5688	171	15	36.2	3	314	22	42.3	1.3113	140	0.12332	2.16	0.19	130	13	166	6.6	22	11	1152	92
GH1226	GH1226_25	2545	55	0.079	0.153202	1.12	0.4	0.23	0.11	1.06	0.55	1.18	0.71	0.41	0.26	1.7	0.68	0.39	0.12	4.02	0.96	1.04	0.002288	4.07	0.71	0.8	0.16	7.32	0.89	1.14	0.00171	150	0.05748	0.151	0.033	1.63	0.33	11.4	1.9	2.1	1.4	29.3	7.8
GH1226	GH1226_26	2200	14	0.048	0.0514584	4	0.19	0.425	0.037	6.43	0.47	12.8	1.6	2.15	0.73	53.1	2.93911	15.6	1.2	183.4	9.4	59.8	1.0764	248.7	7.2	54.2	1.5	494	12	66.8	0.7348	120	0.1786	0.87	0.12	103.6	2.4	174.8	5.5	20.3	2.2	1658	64
GH1226	GH1226_27	2187	27	0.043	0.0519397	4.62	0.25	0.306	0.038	4.89	0.4	6.9	0.66	0.466	0.096	27	2.38554	7.84	0.57	87.6	4.2	27.7	0.3878	116.6	5.8	24.9	1.1	221.6	9.3	30.3	0.3939	140	0.17173	0.45	0.11	38.4	1.9	45.4	1.8	22.9	2.4	751	35
GH1226	GH1226_28	2543	12	0.16	0.0494715	34.4	1.3	2.56	0.24	20.3	1.8	21	1.6	8.5	1.4	54.2	5.47475	13.6	0.94	123.6	7.1	33.9	0.7458	132.9	7.5	29.7	1.5	290	12	38.8	0.8148	220	0.13109	0.523	0.089	178	11	256	13	16.5	3	968	56
GH1226	GH1226_29	2119	19	0.17	0.0667344	15.3	1.1	2.59	0.24	39	3.5	235	30	99	12	631	90.1429	111	12	803	76	167	25.05	511	40	89.6	6.4	696	51	69.2	2.6296	270	0.086447	1.41	0.11	136	9.7	183	18	20.7	2.5	4760	370
GH1226	GH1226_30	2874.4	7.3	0.74	0.507516	27.7	2.2	2.12	0.3	15.6	1.8	16.3	1.9	3.79	0.39	54.1	8.50262	16.5	1.5	195	17	65.2	3.8468	288	24	64.9	5.1	594	40	81	4.779	160	0.11347	2.01	0.18	219	25	369	20	13.4	2	1860	160
GH1226	GH1226_31	2210	26	0.075	0.0220215	11.3	0.67	1.69	0.19	16.7	1.5	20.5	1.7	4.31	0.49	58.7	5.36345	16	0.88	164.8	7.4	47.4	1.0428	186.8	8.5	39.4	1.8	343	13	46.2	0.9702	230	0.09826	0.94	0.14	47.9	3.3	61	3.4	27.5	3.3	1279	49
GH1226	GH1226_33	2180	13	0.068	0.0557498	13.03	0.64	0.89	0.12	12.2	1.3	17.7	1.6	1.48	0.38	67.4	3.61071	19.24	0.76	218.5	8.1	66.9	1.2042	267	6.3	56	1.5	495	16	57.5	0.92	140	0.11481	2.09	0.14	105	2.4	198.2	4.5	13.8	1.9	1769	46
GH1226	GH1226_34	2182	13	1	0.486571	23	2.7	3.38	0.35	25.9	2.2	25	1.6	4.68	0.31	79.6	11.3961	20.6	1.2	209	13	60.3	2.4723	230	16	46.1	3.3	393	23	50.3	1.6599	150	0.085097	1.5	0.22	108.6	9.9	123.1	7	31.4	6	1590	110
GH1226	GH1226_35	2181	15	3.7	3.6571	34.5	8.4	3.5	1.1	19.4	5.1	15.9	4	4.5	1.6	53	5.65836	12.5	2.4	122	18	34.5	1.173	132.8	9.4	28.1	1.5	244	12	31.29	0.222159	210	0.085852	2.28	0.21	102	15	178.9	7.5	13.1	2	957	97
GH1226	GH1226_36	2639	13	1	1.08992	22.9	2.6	2.74	0.45	19.2	2.7	18.5	2.2	5.84	0.79	46.7	5.00357	12.22	0.86	126.9	7.4	38	0.798	162.7	9	39.2	2.1	397	18	53.7	1.4499	240	0.078925	0.94	0.13	155	11	298	12	7	1.8	1110	62
GH1226	GH1226_37	2606	14	0.03	0.018864	25.61	0.68	0.397	0.07	3.75	0.5	5.05	0.48	1.54	0.16	15.2	1.32672	4.38	0.22	48.4	2.3	16.25	0.118625	73.7	3.1	18.56	0.81	193.3	5.1	27.6	0.3036	130	0.12006	0.38	0.1	106.3	3.3	112.3	2.9	10.6	1.8	479	19
GH1226	GH1226_38	2202	21	0.025	0.0090585	12	0.87	0.919	0.07	13.3	1.1	20.2	1.8	2.88	0.63	72.4	5.43	19	1.2	202	10	59.9	1.6772	232.5	9.6	48	1.8	417	13	54.5	0.981	150	0.13448	1.26	0.15	59.6	2.8	54	2.6	19.3	2.4	1531	74
GH1226	GH1226_39	3347	11	0.86	4.19846	20.6	1.6	0.152	0.079	1.95	0.3	4.78	0.58	0.97	0.15	28.1	4.35423	10.19	0.9	138	12	49.8	2.0916	236	19	55.5	4.3	546	40	74	4.366	310	0.15285	1.59	0.15	110	10	165.5	9.9	3.2	1.5	1410	120
GH1226	GH1226_40	2638	27	2.2	3.99637	15.7	5.5	1.68	0.89	9.7	5	4.9	1.2	1.22	0.25	13.7	2.2715	3.89	0.37	48.5	3.7	16.9	0.2366	78.4	6.5	19.3	1.6	186	13	28.1	0.7025	200	0.17032	0.3	0.12	15.4	1.7	42.1	2.9	7.8	1.8	482	34
GH1226	GH1226_41	2574	13	0.043	0.0514097	20.9	1.2	0.259	0.055	2.78	0.47	4.4	0.72	1.35	0.27	17.1	2.7	4.62	0.42	54	4.7	17.7	0.2655	78.1	6.3	19	1.5	187	15	25.9	0.518	590	0.13525	0.48	0.14	110	10	150	14	16.2	3.5	524	33
GH1226	GH1226_42	2168	18	0.019	0.0134747	9.9	2.5	0.283	0.046	3.29	0.55	6.28	0.94	0.6	0.12	26.9	5.23242	8.7	1	110	13	38.5	1.6555	174	18	40.1	3.9	362	35	50.9	2.1378	230	0.11449	1.62	0.19	50.6	6.9	102	10	14.9	2.1	1070	120
GH1226	GH1226_43	2194	17	1.6	1.20267	24	3.3	2.72	0.48	20.7	2.8	24.5	5.3	4.7	2.2	87	13.92	22.7	3.1	244	27	73.2	4.9044	286	25	57.5	4.6	474	32	59.8	2.8106	180	0.10336	1.62	0.14	104	10	118.7	7.8	22.8	3.9	1920	190
GH1226	GH1226_46	2190	18	0.015	0.00395535	25.52	0.65	1.222	0.042	18.24	0.56	25.8	1.2	1.52	0.16	97.5	5.25092	27.38	0.63	313.7	6.9	99.8	2.2954	402	11	81.7	2.2	700	16	92	2.116	150	0.10012	5.16	0.21	152.1	4.4	127.3	3.5	12.3	1.5	2577	59
GH1226	GH1226_47	2194	17	0.064	0.0693215	14.3	0.7	0.391	0.077	4.94	0.9	9.3	2.3	2.3	1	35.8	4.56051	9.8	1.6	111	13	34.7	1.041	143	10	31.4	2	289	18	39.3	0.5895	160	0.16511	0.83	0.13	73.2	6.3	110	11	20.2	2.3	952	77
GH1226	GH1226_48	3247	17	0.076	0.0855349	23.2	1.5	0.38	0.14	3.17	0.94	5.6	1.5	2.15	0.91	21.1	1.81424	6	1.2	66.8	7.6	21.6	0.3456	94.5	5.2	22.33	0.96	221.2	6.9	30.9	0.3399	160	0.10541	0.84	0.13	52.3	4.2	115	9.1	8.1	2.4	606	51
GH1226	GH1226_49	2211	25	1.8	2.75886	17.7	3.8	2.02	0.6	16.2	2.9	16.9	2.1	2.47	0.74	61.3	7.07308	16.5	0.86	183	9.8	58.6	1.9924	230	13	46.8	2.7	388	21	50.2	1.4056	400	0.085846	1.48	0.18	86.8	5.2	111.8	6.9	16.1	1.8	1539	55
GH1226	GH1226_50	2102	38	0.13	0.121182	7.04	0.63	1.02	0.14	12.65	0.76	17	1.1	4.63	0.42	55.9	3.75798	14.32	0.52	148.1	5	43.5	0.7395	168.1	6.3	35.7	1.2	338	13	42	0.672	170	0.13968	0.58	0.11	26.7	2.5	45.6	7.1	28.9	2.3	1101	38
GH1226	GH1226_52	2182	17	0.094	0.131564	10.8	1.2	0.48	0.16	5.4	1.3	9.4	1.7	1.55	0.69	35.7	4.70031	10.3	1.2	115	11	35.7	0.9282	146.4	9.4	31.9	2.1	293	18	36.3	0.6897	140	0.12992	1.31	0.14	70.6	6.2	143	13	14.9	2	967	75
GH1226	GH1226_53	2521	12	0.59	1.01989	10.6	1.1	0.44	0.14	3.58	0.74	4.21	0.48	0.381	0.078	16.6	1.44212	4.9	0.28	58.5	2.4	20.3	0.19285	91.1	3.7	21.18	0.92	205.3	6	30.2	0.4228	150	0.26259	0.831	0.098	94.6	4.9	180	5.8	14.7	2.1	571	23
GH1226	GH1226_54	2548	16	2.8	2.17984	45.3	6.3	3.46	0.79	22.1	3.2	23.9	4	10.9	3.1	107	14.1099	26	5.8	239	45	63.1	6.1838	219	21	45.5	3	420	24	53.8	1.076	160	0.14768	0.7	0.14	99.9	5.9	123.8	7.6	31	26	1920	360
GH1226	GH1226_55	2527	11	0.085	0.0790628	18.2	1.2	0.57	0.13	5.83	0.89	8	1	1.98	0.33	29.6	2.35544	8.83	0.37	104.4	3.5	35.1	0.4563	159.1	6.6	37.7	1.5	383	12	55.5	1.2765	170	0.13873	0.89	0.14	216.1	8.1	353	18	10.7	1.7	1016	31
GH1226	GH1226_56	2184	11	0.12	0.140132	16.7	1.2	0.84	0.19	10.8	1.7	19.3	3.9	3.4	1.6	78	7.4856	21.8	3.3	226	26	66.1	3.305	256	13	52.1	2.5	446	23	58.7	1.2327	120	0.099917	2.11	0.19	153	13	260	27	12.7	1.6	1790	130
GH1226	GH1226_57	2576	20	0.045	0.048401	25.5	1.4	0.47	0.12	4.65	0.96	6.02	0.79	2.7	2.1	18.9	2.63721	5.59	0.57	62.4	5.2	20.6	0.3502	90.8	6.9	21.5	1.5	214	12	29.6	0.6808	270	0.12243	0.51	0.12	95.5	8.5	96.6	4.8	20.3	2.7	587	47
GH1226	GH1226_58	2231	27	5	7.7409	29.5	9.3	3.9	1.6	28.4	9.5	23.2	6.9	3.6	1.7	69	14.2268	17.8	2.6	193	24	59	4.189	236	26	48.5	5	429	39	56.1	3.1977	230	0.14816	1.72	0.25	85	19	77	15	22	2.8	1550	190
GH1226	GH1226_59	502	38	0.086	0.205639	33.4	2	0.46	0.26	5	1.7	7.2	1.8	2.27	0.75	25.5	2.19355	8.64	0.94	106	8.4	37.5	0.7875	179.8	7.4	46.5	2	503	21	75.6	1.89	190	0.15886	1.08	0.13	268.1	8.7	320	26	10.2	4.4	1143	69
GH1226	GH1226_60	2617	20	0.027	0.0213589	4.97	0.19	0.32	0.044	3.85	0.34	5.1	0.55	2.18	0.23	21.6	1.15799	6.04	0.22	64.1	1.6	19.85	0.11116	81.2	2.3	18.28	0.49	172.2	4.6	25.07	0.15042	130	0.23582	0.221	0.071	34.43	0.98	62.9	2	6.6	1.3	547.7	9.6
RA10	RA10_1	3068	16	3.17	0.17	31.6	2	4.06	0.21	26.9	1.8	16	1.6	5.7	0.56	36	2.7	10.42	0.72	112.7	6.7	35.6	2	162	9	40.2	2.3	400	25	55	3.2	9120	490	3.33	0.4	126	8.3	186	15	46.2	5	1018	37
RA10	RA10_4	2956	17	6.2	5.6	25.2	5.2	5.4	4.7	31	25	20	11	6.9	5.1	54	19	17.1	5	189	39	60.4	7.2	256	22	59.5	5	556	45	74.1	5	8720	390	1.8	0.28	86	10	133	35	15.8	3.5	1700	250
RA10	RA10_5	3084	19	0.0027	0.0048	12.52	0.71	0.059	0.011	1.08	0.15	2.92	0.46	0.282	0.076	13.8	1.3	5.5	0.36	77.6	5	30.3	1.9	140	8.7	35.7	2.1	363	22	49.5	3.1	9120	540	2.66	0.23	66.2	4.4	117.9	8.9	6.4	2	830	30
RA10	RA10_6	2523	23	0.5	0.14	19.8	1	0.68	0.17	5.9	1.1	6.85	0.98	1.59	0.28	18.7	1.8	5.11	0.37	51.5	3	15.67	0.89	65.2	3.5	15.34	0.77	157.2	7.6	22.7	0.88	8080	240	0.67	0.13	122.7	5.8	142.5	9	15.7	2.4	456	18
RA10	RA10_7	2631	20	0.0081	0.0071	5.28	0.28	0.076	0.011	1.65	0.14	3.62	0.55	0.64	0.12	18.4	1.5	5.83	0.32	72	4.2	25	1.3	109	5.3	24.7	1.2	256	17	33.6	1.7	7370	390	0.91	0.12	52.5	2.8	95.2	7	11.6	2.2	669	27
RA10	RA10_9	2975	19	0.026	0.013	14.58	0.79	0.1	0.015	1.73	0.17	4.32	0.52	0.9	0.14	21.9	1.8	7.85	0.53	104.6	6.4	35.2	2	155.3	9.4	37	2.2	353	22	49.2	2.9	7940	480	1.52	0.2	45.6	3	70.6	4.8	9.3	2.1	982	44
RA10	RA10_10	2537	17	1.31	0.98	12	0.93	0.62	0.3	4.7	1.6	5.9	1.1	1.5	0.35	23.2	2.5	8.05	0.66	101.7	7	36.5	2.3	164.4	9.9	40.2	2.7	404	27	59.5	3.9	7950	500	0.68	0.14	125	10	185	14	3.9	2.1	1029	37
RA10	RA10_13	3315	14	3.16	0.49	50.6	4.2	3.21	0.5	21.3	2.6	20	2.1	6.16	0.86	95	7.6	34.8	2.5	474	35	182	15	839	65	199	15	1900	150	252	19	9640	720	14.6	1.5	156	12	236	21	25.9	4.5	5240	260
RA10	RA10_16	3064	16	1.149	0.071	18.52	0.97	1.551	0.087	11.44	0.81	8.1	0.78	2.59	0.32	19.5	1.4	5.76	0.41	66.4	4.4	22.2	1.5	100.5	6.7	25.8	1.8	255	19	36.7	2.5	9720	600	3.04	0.31	162	10	170	14	17.8	2.7	648	24
RA10	RA10_18	3290	18	5.41	0.58	36.9	2.8	6.12	0.68	44	4.6	37.5	4	15.2	1.6	121.9	9.7	38.2	2.6	424	32	133.3	8.8	534	36	118.5	8.7	1082	80	138	10	7980	590	2.73	0.32	370	52	97.7	8.3	8.9	2.3	3650	180
RA10	RA10_19	3074	15	2.3	0.17	23.5	1.5	2.77	0.24	18.9	1.7	12.53	0.99	3.92	0.3	31.2	2.2	9.21	0.5	107.7	6.5	35.5	2.1	160	9	41	2.4	417	26	55.1	3.4	8930	520	3.71	0.35	107.9	6.6	205	13	12.7	2.2	1015	33
RA10	RA10_20	2591	20	0.29	0.25	15.17	0.93	0.206	0.064	2.6	0.66	4.56	0.72	0.57	0.11	17.4	1.7	5.95	0.41	74.7	4.9	25.8	1.5	114.7	6.5	27.7	1.7	275	16	36	2.1	8270	480	0.85	0.16	70.2	4.3	101.3	7.1	10.4	2.7	725	27
RA10	RA10_21	3243	16	0.0205	0.0093	14.13	0.87	0.22	0.021	3.57	0.28	6.44	0.7	2.62	0.29	31.5	2.1	10.22	0.64	127.2	7.9	45	2.7	214	12	55.2	3.2	602	37	86.3	5.3	7060	400	0.64	0.13	84.5	5.5	137.1	9.9	8	2.3	1328	53
RA10	RA10_22	3422	12	0.36	0.12	13.03	0.68	0.49	0.12	4.15	0.7	4.46	0.61	1.16	0.2	16.6	2.6	5.19	0.81	63	10	22.6	3.6	98	15	24	3.2	242	28	34.6	4.2	8600	570	0.65	0.15	52.1	4	83.1	8.3	5.6	2.2	638	91
RA10	RA10_23	3317	16	0.31	0.17	12.09	0.87	0.33	0.15	2.31	0.67	3.6	1	1.2	0.15	13	1.1	3.99	0.25	49.8	3.1	17.8	1.1	81.1	4.7	21.4	1.3	240	13	35.1	2.1	6890	370	0.55	0.11	57.2	3.4	96.5	5.9	5.3	1.9	536	23
RA10	RA10_24	2595	18	0.36	0.22	20	1.2	0.79	0.19	10.5	1.6	16.5	1.6	2.11	0.33	73.3	6.1	24.3	1.5	291	18	97.3	6.2	397	26	88.7	5.9	816	56	98.1	6.8	7240	510	1.92	0.3	196	14	151	11	10.8	2.9	2721	91
RA10	RA10_25	2538	16	0.88	0.23	25.9	3	1.66	0.31	14.6	1.7	15.9	1.5	2.69	0.4	49.3	3.3	15.18	0.87	178.4	9.7	60.3	2.9	256	13	59	3.4	569	34	70.2	4.1	7750	420	0.87	0.17	300	23	266	18	9.6	2.7	1686	52
RA10	RA10_26	2520	20	0.039	0.016	10.61	0.67	0.157	0.026	3.03	0.27	6.8	0.76	0.525	0.092	29	2.5	8.75	0.69	104.1	7	32.8	2.1	132.3	9.3	28.9	2.1	272	18	35.6	2.5	7400	420	0.77	0.11	75.3	5.3	85.7	5.6	9.1	2.3	881	42
RA10	RA10_27	2539	18	0.35	0.099	25.8	1.5	0.94	0.11	11.21	0.91	13.6	1	3.32	0.32	45.1	2.8	13.27	0.78	163	10	55.8	3.7	241	17	55.5	4.5	535	43	70	5	7330	410	0.91	0.16	330	26	216	19	15.4	2.4	1530	86
RA10	RA10_28	3286	16	0.108	0.029	21.4	1.2	0.564	0.041	9.71	0.51	17.3	1.5	8.17	0.6	61.1	4.2	16.7	1.1	179	11	53.6	3.3	214	14	49	3.1	491	31	65.1	4.2	6430	400	0.62	0.12	122	8.1	135	10	14.1	3.3	1460	62
RA10	RA10_29	2529	23	0.069	0.03	16	1.1	0.402	0.057	5.83	0.61	8.75	0.89	1.63	0.23	29.3	2.9	8.96	0.67	99.7	8.1	31.5	2.4	131.1	9.7	30.3	2.1	307	22	40.7	2.5	6710	380	0.94	0.14	58	4.4	60.2	4.8	27.9	3.6	873	45
RA10	RA10_30	3314	13	1.73	0.61	33	5.8	1.79	0.61	13.3	4	12.8	2.5	2.96	0.92	48.3	5.7	16.6	1.6	217	17	74.9	5.4	323	22	73.6	5.3	698	49	89.5	5	8550	520	4.93	0.35	137	11	207	19	11.1	2.5	1990	100
RA10	RA10_31	2989	13	2.17	0.14	24.2	1.2	2.81	0.18	18	1.2	11.6	1.2	3.78	0.3	23	1.9	6.51	0.49	69.5	3.8	22.9	1.3	105.9	6.2	27	1.6	292	16	38.3	2.1	9330	480	2.66	0.29	118.8	7.4	200	13	29.3	6.4	666	23
RA10	RA10_35	2859	17	0.5	0.15	16.8	1.2	0.51	0.14	3.23	0.85	3.34	0.68	0.97	0.25	9.2	1.4	3.45	0.39	47.8	4.4	18.7	1.5	94.3	7.3	26.8	1.9	310	22	43.1	2.5	9620	550	2.52	0.35	60.7	5.8	175	13	32	11	544	33
RA10	RA10_36	2531	16	0.014	0.01	14.86	0.9	0.053	0.013	0.93	0.2	2.06	0.53	0.644	0.098	8.5	1.1	2.95	0.27	42.3	3.3	16.1	1.1	82.8	5.7	23.7	1.5	302	21	45	2.9	8410	500	0.68	0.12	113	8.9	189	16	4	1.7	501	21
RA10	RA10_39	3423	13	2.01	0.29	13.5	1.3	1.77	0.24	13.9	2	10.8	1.8	3.36	0.54	32.4	4.1	9.84	0.95	107.9	8.5	34	2.8	146	13	32.3	2.4	291	20	42.7	3.7	7830	350	0.55	0.11	77.1	6.3	77.9	5.9	13.2	2.5	940	76
RA10	RA10_41	3333	14	0.024	0.03	5.36	0.3	0.0233	0.0089	0.32	0.082	0.81	0.23	0.331	0.089	3.02	0.54	0.98	0.13	14.3	1.3	5.51	0.4	28.9	2.1	8.99	0.68	114.8	7.6	19.1	1.4	8800	510	0.59	0.15	52.9	3.4	102.3	7.5	6.8	2.2	177.1	8.8
RA10	RA10_42	3329	14	0.65	0.18	6.9	1	0.65	0.17	5.3	1.3	4.88	0.84	1.03	0.21	20	3.3	7.5	1.1	101	15	35.1	5.1	155	21	35.7	4.8	376	45	51.1	7	7730	460	0.77	0.14	51.8	9	161	11	4.2	1.8	970	140
RA10	RA10_44	2628	17	6.1	6.1	24.4	8.2	4.8	4.5	16.3	6.8	11.4	2.9	3	1.1	31.5	4.2	9.8	1.1	121	11	39.1	2.5	171	11	39.9	2.5	395	25	52.9	2.8	8100	410	1.9	0.23	134.4	8.5	175	11	9.9	2.2	1118	54
RA10	RA10_45	3069	13	7.3	2.4	39.9	7.3	36	60	35.9	8.4	19.3	3.2	4.91	0.93	39.3	5.5	11.5	1.1	132	11	44.6	3	203	15	47.9	3.2	455	31	79.2	5.7	9510	640	3.22	0.3	317	28	310	23	35.2	7.4	1353	61
RA10	RA10_46	2577	15	3.57	0.31	16.3	1.1	3.66	0.38	21.8	2.4	11.6	1.7	3.96	0.54	19	2.2	4.87	0.42	49.6	4.3	15.6	1	73.9	4.3	21.1	1.4	270	17	45.6	2.9	10060	590	0.72	0.18	88.9	5.5	194	12	5	2.1	500	17
RA10	RA10_47	2601	31	0.05	0.023	5.71	0.43	0.127	0.023	2.06	0.29	3.52	0.53	0.79	0.14	16.8	1.4	5.69	0.41	75.1	4.8	25.2	1.5	113.3	7.1	26.5	1.7	271	17	35.7	2.1	7980	490	1.28	0.18	14.6	1.5	28.6	4.6	17.1	3.3	709	30
RA10	RA10_48	3221	19	0.014	0.0089	12.93	0.61	0.081	0.012	2.02	0.19	5.72	0.88	1	0.14	29.8	2.6	10.91	0.59	144.5	8.5	52.6	2.7	228	12	52.9	2.9	543	29	71.2	4.3	8540	480	3.41	0.32	29.1	1.6	47.4	3.2	16	9.3	1377	53
RA10	RA10_49	2529	15	1.82	0.59	27	1.9	1.23	0.33	8	1.8	6.9	1.1	1.71	0.41	22	1.7	6.43	0.46	74.3	4.2	25	1.2	113.1	5.2	28.12	0.98	296	12	42.5	1.6	8240	320	1.02	0.16	102.9	4.3	151.6	8.1	4.7	2	716	25
RA10	RA10_50	2534	17	0.028	0.012	8.88	0.57	0.098	0.017	1.79	0.16	3.95	0.66	0.71	0.14	19.2	1.5	7.27	0.5	94.8	6.3	35.9	2.5	168	12	41.6	2.8	430	29	62.3	4.7	7940	470	1.13	0.22	96.2	7	184	14	8.4	2.2	1001	51
RA10	RA10_51	2671	20	1.4	1.3	9	3.7	0.73	0.58	3.9	2.6	2.78	0.67	0.48	0.14	10.9	1.1	4.17	0.26	54.8	3.3	19	1	88.8	4.8	20.9	1.2	222	13	29.7	1.8	7650	480	0.64	0.11	49	3.1	97.1	6.3	11.1	2.9	538	21
RA10	RA10_52	3085	19	0.042	0.017	10.39	0.55	0.079	0.019	1.06	0.19	2.64	0.44	0.281	0.089	10.7	1.1	3.79	0.24	56.7	2.9	21.72	0.97	104	4.3	26.8	1.3	288	16	38.5	2	8830	340	2.25	0.25	50.5	3.1	90	7	7.9	2.4	601	20
RA10	RA10_56	2526	16	6.42	0.97	45.9	2.7	6.14	0.92	36.4	5.1	25.8	3.1	8	1.4	54.3	5.4	15.6	1.6	161	14	44.4	3.6	180	15	40.5	3.4	378	28	45.5	3.2	7870	490	1.81	0.23	188	14	214	15	29.3	6.6	1228	76
RA10	RA10_57	2621	15	4	0.86	24.2	3.1	4.19	0.81	26.1	4.6	15.8	3.2	4.65	0.89	32.9	5.8	8.7	1.4	95	15	29.6	3.7	133	17	31.8	3.2	330	28	43.6	3.5	9880	520	1.75	0.2	108	12	213	23	6	2.1	860	110
RA10	RA10_58	2989	17	1.9	1.3	17.7	5.6	1.7	1.2	10.7	6.3	9.8	4.1	2.6	1.6	29.3	6.8	9.2	1.3	113	11	37.8	2.6	161	10	37.9	2	379	21	49	2.9	7800	350	1.1	0.18	63	17	74	14	16.6	3	1002	73
RA10	RA10_60	3294	15	2.43	0.51	10.35	0.66	1.99	0.42	10.7	2.2	7.6	1.8	2.75	0.64	13	2.5	3.34	0.51	35.2	4.6	10.4	1.1	46	4.1	11.66	0.7	142.7	9.4	20.9	1.3	11690	540	1.19	0.2	43.5	2.8	219	11	3.2	1.9	306	28
RA10	RA10_61	3297	13	2.52	0.82	15	1.2	2.06	0.68	13.3	4.5	9.8	2.4	3.44	0.82	26.1	3.3	8.68	0.89	105	7.6	36.3	2.5	166	12	42.9	3.4	455	37	66	4.8	9360	610	2.13	0.23	152	24	268	17	13.6	3.5	1088	57
RA10	RA10_62	2908	18	8.7	2.4	63.9	4.1	9.5	2	65	13	44.6	8.1	14	2.8	92.8	9.4	26.3	2.3	280	20	85.7	4.5	348	21	78.1	4.5	768	46	98.3	5.9	8020	450	1.37	0.22	160.2	9.8	137	13	20.3	2.8	2370	120
RA10	RA10_64	2938	13	0.049	0.021	11.36	0.63	0.356	0.038	6.13	0.49	13.1	1.1	1.84	0.35	63.4	4.7	21.5	1.5	283	19	96.3	6.5	400	25	87.1	5.5	785	56	96.6	7.1	7460	520	2.52	0.26	160	12	225	18	7.2	4.1	2576	91
RA10	RA10_65	2557	19	1.1	1.2	23.9	7.6	1.5	1.7	9.5	9.5	6.7	3.4	1.7	1.1	17.2	5.5	5.39	0.79	63	7	22.1	1.7	98.1	5.8	23	1.5	242	15	31.6	1.9	7650	350	1.01	0.17	96	28	149	23	11.3	3	601	39
RA10	RA10_68	2564	18	14.1	2.5	41.7	5.3	13.5	2.4	69	12	37.4	8	17.1	3	74	12	20.9	3	228	34	65.2	7	269	16	68.6	6.9	738	71	88.7	7.7	7500	740	1.86	0.31	106	11	196	12	19.3	7.4	1590	180
RA10	RA10_69	2485	16	0.96	0.11	26.1	1.3	0.99	0.11	6.1	0.66	4.97	0.64	1.64	0.2	13.1	1.2	3.74	0.29	43.5	2.9	14.14	0.94	62.1	3.8	15.6	1	161.8	8.9	22.8	1.3	8870	500	1.25	0.18	101.3	6.7	176	12	14.9	2.5	412	13
RA10	RA10_70	2596	17	8.51	0.89	19.4	1.5	7.02	0.97	39.1	4	21.5	2.1	7.8	1	41.9	3.7	12.34	0.99	132.1	9.3	40.7	3	179	12	44.1	2.8	451	34	57.6	3.4	9880	560	3	0.31	107.6	7.6	236	16	6.8	1.8	1196	62
RA10	RA10_72	3046	15	7.1	1.1	40.1	3.5	6.71	0.95	42	5.8	21.7	3.9	8	1.5	39.8	4.3	11	1	112.3	9.7	34.3	2.5	148	10	37.8	2.2	399	24	54.3	3.6	9540	540	4.17	0.48	117	7.8	203	17	22.3	2.1	983	55
RA10	RA10_73	2533	15	0.161	0.057	32	2	0.34	0.051	4.95	0.62	7.14	0.95	1.13	0.2	24.8	2.3	7.49	0.62	83.3	7.1	27.8	2.3	121	10	29.8	2.5	306	27	43.3	3.8	7500	450	1.22	0.17	107.2	8.7	166	15	10.6	2.3	759	48
RA10	RA10_74	2636	21	0.66	0.4	12.2	4.6	0.65	0.38	4.4	1.8	4.9	0.92	1.23	0.28	17.3	1.7	5.73	0.53	71.6	5.4	23.8	1.4	104.1	6.9	25.7	1.7	250	14	36.5	2.2	7780	480	0.8	0.11	51.6	4.5	62.6	3.8	15.4	2.5	685	39
RA10	RA10_75	2526	20	0.16	0.16	23.4	1.4	0.383	0.069	5.67	0.6	8.7	0.98	1.32	0.2	32.4	3.1	9.37	0.8	111.9	8.6	37.5	2.8	163	12	39.1	3	410	33	56.4	4.5	7670	510	0.9	0.16	84.9	6.9	95.5	7.3	13.6	2.6	1037	59
RA10	RA10_76	2596	20	3.88	0.46	29	3	4.11	0.5	25.8	3.1	16.3	2.1	5.66	0.9	30.9	3	9.34	0.65	94.9	5.2	29.9	1.6	126.1	8.1	29.6	1.8	294	21	38.1	2.5	9520	420	0.94	0.2	171	22	94.6	7.1	8.8	2.3	785	46
RA10	RA10_77	2508	18	1.1	1.1	31.9	3.3	1.15	0.86	7.4	4.3	7.6	2	1.09	0.63	20.8	2.9	7.02	0.76	84.9	7.3	29.1	2.3	130.5	9.2	32.9	2.3	342	27	47.1	3.6	9120	550	1.79	0.25	133	11	189	17	10.2	2	832	62
RA10	RA10_78	2534	14	15.1	6.4	44	12	7.8	1.9	43.6	8	23.3	2.7	6.99	0.85	48.9	3.9	11.77	0.7	121.4	8.5	35.3	1.9	144.3	7	34	1.9	335	21	43.5	2.3	9390	490	1.18	0.22	193	15	261	26	9.9	2.7	1010	35
RA10	RA10_80	3107	26	14	12	23	10	3.4	1.2	20.6	5.7	12.5	1.7	5.54	0.58	41.9	4.3	13.6	1.2	171	14	60.7	5.1	267	23	60	5	547	42	97.6	8.5	5450	380	0.258	0.093	20.1	1.7	25.5	2.4	9.4	2.7	1690	130
RA10	RA10_81	2627	24	0.59	0.85	9.73	0.5	0.211	0.073	2.9	0.42	4.12	0.46	1.56	0.21	15	1.2	4.61	0.33	52.6	2.6	18.67	0.95	81.3	4.2	19.05	0.89	204.3	8.5	28.1	1.4	7610	330	0.34	0.1	86.2	4.8	69.9	2.7	16.3	2.5	539	23
RA10	RA10_82	2520	21	0.0057	0.0082	8.39	0.52	0.058	0.013	1.04	0.13	2.85	0.42	0.322	0.087	12.8	1	4.38	0.24	58.7	3.1	20.8	1.1	94.6	4.7	23.1	1.2	241	14	33.7	1.7	8010	360	0.91	0.15	58.3	2.9	105.1	7.3	8.2	2.2	591	18
RA10	RA10_84	2973	9.5	5.2	1.8	12.7	1.5	4.4	1.5	26	8.5	16	5.1	7.5	2.3	29.3	9.3	7.6	2.4	71	20	18	4.2	74	14	19.8	2.6	241	26	48.3	4.9	13500	690	0.85	0.2	53.8	3.8	484	36	49.9	5.8	530	110
RA10	RA10_85	2531	15	1.6	0.21	16.7	2	1.89	0.25	15.6	1.9	14.2	2.1	3.59	0.54	41.3	6.1	11.2	1.6	122	17	36.5	4.9	147	19	32.7	4.2	310	34	43.7	4.2	7460	380	0.85	0.16	135	18	257	19	17.1	3	980	130
RA10	RA10_88	2522	13	2.48	0.35	28.9	2.7	2.76	0.41	20.5	2.3	20.3	1.6	3.15	0.62	59.8	4.7	17.4	1.2	204	13	66.6	3.9	268	16	60.3	3.5	591	34	74.5	4.4	7680	450	1.03	0.18	229	17	269	24	13.9	3.3	1739	77
RA10	RA10_89	3392	19	3.2	0.5	15.1	1.3	3.21	0.49	22.3	3.1	18.2	2.4	5.79	0.79	46.4	6.1	11.37	0.99	129	10	42.3	2.6	172	11	35.8	2.1	304	17	52.4	3.1	7030	310	0.48	0.15	87.7	8.6	85.2	7.6	16.8	4.6	1090	65
RA10	RA10_91	2639	15	3.26	0.87	38.2	5.3	3.7	1.1	23.7	6.2	18.3	3.9	5.7	1.4	40.4	5.7	12	1.2	134	10	42.7	2.4	182.4	9.4	44.6	2.4	413	22	52.3	2.7	8630	360	1.02	0.18	199	13	183	13	9.6	2	1152	62
RA10	RA10_95	3028	15	1.07	0.38	15.6	1.9	1.47	0.44	7.9	2.1	6.9	1.6	1.72	0.47	19.7	2.4	6.56	0.59	89.4	6	32.1	1.9	148	8.4	38.2	2.3	382	20	53	2.9	9570	410	2.74	0.39	100	11	116.1	6.9	14.5	7.4	914	47
RA10	RA10_96	3193	16	0.049	0.039	7.38	0.4	0.219	0.04	3.44	0.3	6.61	0.79	1.31	0.21	24.4	2.1	7.79	0.41	93.2	4.9	30.9	1.5	137.7	6.1	33.4	1.5	341	18	46.2	2.6	8140	390	1.76	0.23	52.8	2.9	141	14	3.5	2.3	869	29
RA10	RA10_97	3170	34	7.3	3.4	42	19	7.9	3.6	45	20	25.4	8.7	9.5	3.2	65	10	18.8	1.6	201	12	62.9	4	255	15	58	3.3	572	35	72.5	4.6	6970	470	3.04	0.95	38	14	55	18	35	15	1685	70
RA10	RA10_99	3343	18	11.8	1.1	68.3	8.5	13.5	1.5	83	10	51.2	5.6	17	1.8	135	10	39.3	2.5	463	25	159	7.3	675	31	138.9	7	1158	57	183.6	8.8	7420	360	1.99	0.24	328	44	129.1	9.9	14.5	3.4	4350	170
RA10	RA10_100	2683	18	6.47	0.52	23.5	2.1	6.75	0.56	36.4	3.2	21.1	2.7	8.01	0.88	39.9	3.5	10.91	0.81	107.8	6.4	32.1	1.9	132.2	7.2	32	1.7	339	19	44.7	2.4	8400	460	1.19	0.18	65.9	4.4	144	13	19.7	3.6	905	37
RA5	RA5_1	1919	21	5.93	0.56	37.4	2.1	3.35	0.27	19.1	1.5	12.2	1.3	2.6	0.3	44.8	3.3	14.29	0.9	168.6	9.6	58.9	3.3	255	15	59.1	3.6	563	32	73.7	5	8090	480	0.89	0.17	220	16	233	15	18.6	3.4	1661	82
RA5	RA5_9	2261	96	2.4	1.3	20.3	9.8	1.86	0.87	11.5	4.7	9.3	1.6	1.79	0.73	42.8	3	16.04	0.86	197.3	7.3	66.4	2.7	287	12	67.1	2.5	657	25	85	4.1	9330	410	0.85	0.15	64.9	3	186	14	9.5	3	1869	62
RA5	RA5_11	1992	28	2.02	0.24	20	1.7	1.28	0.14	7.42	0.85	5.01	0.7	0.78	0.16	16	1.7	5.33	0.44	59.8	3.9	21.4	1.1	93.6	4.9	22	1.4	215	13	28.8	1.6	10760	540	1.47	0.23	157	12	240	18	17.4	3.3	593	24
RA5	RA5_19	1889	22	0.719	0.095	12.7	0.83	0.556	0.08	3.19	0.45	3.06	0.63	0.54	0.11	10.8	1.4	4.31	0.41	57.9	4.8	21.1	1.6	98.8	6.8	23.7	1.6	240	15	32.9	2.3	8790	510	1.48	0.25	60	4.6	125.8	8.2	16.1	3.8	599	33
RA5	RA5_20	1777	17	0.02	0.017	17.22	0.88	0.229	0.026	4.75	0.41	10.2	1.1	1.27	0.23	44.5	3.6	13.67	0.81	151.2	8.8	52.1	2.7	213	12	47.2	2.6	435	24	56.3	3.5	9870	560	0.9	0.19	278	17	292	21	9.9	2.9	1403	49
RA5	RA5_22	1768	22	0.013	0.013	20.79	0.91	0.058	0.016	1.4	0.19	4.78	0.76	1.28	0.19	25.7	2.1	9.51	0.59	128.5	6.2	47.4	2.5	215	11	50.9	3	497	32	69.7	4.4	9340	490	1.43	0.25	128.1	7.7	170	11	16	3.3	1324	51
RA5	RA5_23	2037	55	6.8	1.9	40.6	8.7	4.5	1.3	22.6	6	8.5	2	1.95	0.48	20.4	2.8	6.09	0.7	67.3	5.8	22.9	1.6	98.2	6.4	23.6	1.4	231	12	32.4	1.9	9180	390	1.8	0.32	119	13	185	15	13.8	3.9	646	36
RA5	RA5_25	1839	19	0.01	0.012	15.23	0.73	0.068	0.017	1.33	0.19	4.86	0.77	0.338	0.098	35.4	3.2	13.51	0.84	182.3	9.8	68	3.6	306	14	69.3	3.9	646	34	85	3.9	11190	460	5.81	0.44	184.5	8.5	387	19	3.6	3.4	1814	95
RA5	RA5_26	1769	20	0.189	0.031	6.62	0.39	0.16	0.026	1.62	0.25	3.16	0.6	0.34	0.1	18.4	1.5	7.46	0.52	99.2	5.5	37.9	2.3	177	10	43.4	2.6	444	24	63.5	3.5	10780	580	1.35	0.19	114.4	7.1	266	19	10.2	3.5	1089	44
RA5	RA5_32	1763	23	0.116	0.026	4.03	0.46	0.054	0.014	0.69	0.16	2.12	0.47	0.223	0.086	13.3	1.9	4.84	0.36	71	6.2	27.5	2.2	133	10	34.1	2.6	352	32	49	3.6	10940	740	1.01	0.21	66.3	5.8	178	21	10.9	3.1	786	26
RA5	RA5_33	2335	70	4.78	0.55	42.5	5.7	4.75	0.65	24.6	3.8	10.4	1.8	2.59	0.61	27.7	3.6	8.84	0.67	102.7	5.3	36	2	169.9	7.4	38.4	1.9	324	18	59.7	2.8	8570	530	0.95	0.3	117.5	7.8	162	14	9.4	6.4	1119	39
RA5	RA5_34	1867	27	3.6	1.1	51	5	1.86	0.48	12.5	2.3	12.6	1.3	1.54	0.25	47.1	3.4	15.32	0.92	190	11	66.5	3.6	290	15	70.7	4.4	664	41	89.8	5.1	8890	510	2.67	0.28	386	32	361	32	24.9	4.5	1856	65
RA5	RA5_36	1773	23	0.171	0.099	7.01	0.43	0.078	0.03	0.87	0.18	1.93	0.48	0.1	0.087	9.69	0.99	3.69	0.34	49.2	3.4	18.9	1.2	86.7	5.6	21.2	1.2	213	13	30.1	2.1	9370	550	2.51	0.33	79.1	5.3	190	13	9.2	2.9	525	23
RA5	RA5_37	1777	18	0	0.01	4.99	0.25	0.046	0.013	0.99	0.16	3.1	0.6	0.22	0.14	18.1	1.4	8.1	0.39	109.7	3.8	43.2	1.7	207.3	7.1	53.1	2.6	518	21	75.5	3.3	11780	480	1.71	0.28	116.8	5.7	317	16	7.7	2.5	1202	39
RA5	RA5_41	1780	21	0.43	0.24	8.24	0.87	0.271	0.077	3.41	0.58	6.89	0.92	1.01	0.19	34.9	3.6	12.07	0.89	147	10	54.2	3.7	239	16	55.9	3.7	557	40	76.3	4.9	9870	530	0.85	0.18	115	12	160	13	11.4	3.2	1494	81
RA5	RA5_45	1779	18	0.133	0.058	6.94	0.5	0.198	0.066	2.12	0.51	4.41	0.79	0.4	0.13	20.7	1.6	8.18	0.51	108.5	6.1	41.5	2	201.9	8.9	49.7	2.3	493	28	67.6	4.2	10600	560	1.56	0.21	134.7	6.5	309	15	9.1	2.9	1179	47
RA5	RA5_46	2693	62	16.7	1.9	99	10	10.7	1.3	53.9	6.5	17.8	2.5	5.16	0.67	33.5	3.2	8.42	0.78	82.1	5.6	24.9	1.7	106.2	7.2	26.6	1.9	277	21	40	2.8	10430	660	1.35	0.23	306	18	357	24	21.5	3.9	737	32
RA5	RA5_48	1790	28	0.24	0.19	9.09	0.76	0.112	0.058	0.98	0.31	2.03	0.36	0.204	0.081	10.9	1.6	3.77	0.28	51.5	3.3	20.8	1.2	91.9	5.5	23.4	1.4	235	14	33.4	2	9300	540	2.1	0.29	76.3	4.3	152.7	9.7	12.7	2.6	587	21
RA5	RA5_50	2260	150	1.52	0.36	11.9	1.8	1.06	0.24	5.8	1.2	4.4	1	0.64	0.15	23	2.3	7.16	0.47	97.7	5.6	35.9	1.8	162.6	8.8	38.6	2.2	389	19	56.5	3.1	9060	330	1.57	0.24	96.1	7.4	210	11	20.1	4.6	980	49
RA5	RA5_54	1796	22	0.027	0.015	3.64	0.24	0.079	0.016	1.94	0.21	4.56	0.62	0.45	0.11	27.6	2.3	9.45	0.69	116.9	7.7	43.5	2.5	196	11	48	2.7	452	26	63.9	3.8	9700	510	0.88	0.18	78.7	4.8	155	12	13.8	3	1244	47
RA5	RA5_56	1797	24	0.0066	0.0098	7.19	0.29	0.03	0.011	0.61	0.17	2.11	0.47	0.153	0.075	9.1	1.3	3.17	0.26	45	2.5	16.64	0.82	79.4	4	20.1	1.1	201	12	28.4	1.8	8850	470	1.61	0.24	61	3.4	130.2	7	12.1	3.3	472	18
RA5	RA5_59	1793	25	0.0042	0.0097	10.4	0.5	0.055	0.014	1.33	0.21	3.29	0.5	0.53	0.13	15.7	1.7	5.08	0.32	58.4	3.3	21	1.2	89.9	5.4	21.4	1.1	201	11	27.8	1.8	8920	410	0.7	0.13	86.6	5.6	117.2	8.5	14.9	3.5	591	32
RA5	RA5_68	1802	19	0.0114	0.0077	3.66	0.27	0.061	0.018	1.31	0.2	4.24	0.66	0.26	0.11	26.1	2.4	8.82	0.62	120.2	7.8	47.2	2.9	215	13	52	3	505	30	71.9	4.5	9950	540	0.9	0.16	86.6	5.5	199	14	11.5	3.2	1323	44
RA5	RA5_70	1943	71	3.1	1.5	20	7.5	1.64	0.76	8.8	3.9	5	1.2	0.64	0.24	18.6	1.9	6.28	0.54	78.5	5.1	29.5	1.7	139.7	8.8	34.4	2.2	348	20	46.7	3.2	9570	560	1.68	0.21	94.7	5.8	230	16	14	2.9	850	41
RA5	RA5_73	2438	22	12.25	0.91	71	5.7	8.66	0.74	44.3	3.6	18.4	1.9	4.44	0.54	43.7	3.5	13.54	0.92	150	10	48.3	2.4	206	11	46.7	2.3	428	26	56.8	3.3	10670	590	1.25	0.24	252	22	326	21	19.6	3.4	1418	44
RA5	RA5_75	1863	41	6.8	4.2	55	32	8.3	5	53	32	26	14	5.4	3.1	55	22	14.5	4.5	153	38	51	11	212	37	51.1	8.7	453	77	60.6	8.6	9270	510	1.27	0.25	144	38	289	96	24.8	6.7	1500	340
RVK1	RVK1_2	1634	33	0.16	0.023	21.6	1.3	0.491	0.064	4.68	0.47	7.2	1.3	3.4	1.2	43	16	11.4	3.7	102	25	29.9	4.9	125	14	30.9	2.6	312	23	39.3	2.4	9620	600	1.2	0.2	77.2	5.6	92.4	6.1	23.9	4.7	790	100
RVK1	RVK1_5	1596	30	0.0129	0.0083	15.2	0.67	0.059	0.011	0.97	0.16	2.87	0.53	0.394	0.084	14.6	1.3	5.35	0.32	72.2	4.5	27.1	1.6	129.4	7.6	32.4	1.8	338	20	42.5	2.6	8910	530	1.3	0.25	66.6	4.3	78.2	5	19.8	2.5	774	27
RVK1	RVK1_11	1588	19	0.12	0.12	19.12	0.75	0.17	0.045	2.22	0.32	5.04	0.71	0.82	0.3	30.2	4.1	10.27	0.78	126.7	6.2	43.8	1.8	205.5	7.9	50.6	1.9	515	18	65.4	2.8	10610	420	4.36	0.36	174	6.6	335	16	7.5	2.8	1235	34
RVK1	RVK1_12	1705	25	3.38	0.58	49.6	4.1	4.81	0.78	38.8	5.9	31.8	5	10.8	1.7	87	13	23.5	3.3	211	26	55.6	5.4	223	17	55.8	3.8	559	31	71.8	5.2	10230	470	2.5	0.27	223	18	212	13	18.2	4.2	1350	120
RVK1	RVK1_18	1824	40	2.17	0.58	44.8	6.6	7.1	1.9	59	15	32.5	8.4	8.6	2	48.1	9.9	12.4	2.3	103	13	28.9	3	115	12	26.7	2.1	272	22	33.4	2.4	9200	620	1.2	0.18	80	5.7	127	11	22.5	4.2	783	89
RVK1	RVK1_20	1658	28	1.06	0.51	43.5	6.2	4.2	1.8	39	16	31	11	7.9	3	55	15	15.7	3.7	156	29	46.2	7.3	187	26	43.8	5.3	433	44	55.9	6.5	9220	520	2.01	0.25	119	12	139	19	18.3	3	1190	170
RVK1	RVK1_22	1211	25	0.0088	0.0084	11.45	0.76	0.037	0.01	0.71	0.12	1.95	0.39	0.098	0.051	8.4	1.4	3.14	0.29	42	3.2	15.5	1.2	69	5.4	16.3	1.2	167	13	21.9	1.5	9730	590	1.59	0.22	122.5	8.2	217	15	8.8	2	417	23
RVK1	RVK1_24	1591	31	7.7	0.96	92	9	26.9	3.9	235	35	150	23	43.8	9.2	350	100	76	21	610	150	135	30	442	88	83	13	658	75	87	11	9490	690	1.76	0.28	310	24	325	25	43.7	5.9	3700	1100
RVK1	RVK1_26	1189	27	0.151	0.056	17.8	1.3	0.211	0.042	3.18	0.34	6.67	0.89	0.63	0.15	27	3.6	9.26	0.89	113.6	9.1	39.2	3.1	173	13	42.2	3.4	418	30	54	4.2	9650	580	1.86	0.22	174	13	196	16	28.1	4.1	1105	79
RVK1	RVK1_31	1169	37	0.082	0.018	48.6	2.8	0.72	0.11	11.3	1.5	15.6	2.1	4.04	0.52	54.4	5.7	15.4	1.6	169	17	52.9	5.3	215	22	48.7	4.3	451	37	56.6	5.1	8240	330	0.96	0.17	164	20	80.2	5.9	26.2	2.8	1390	140
RVK1	RVK1_33	1165	34	0.17	0.15	13.42	0.82	0.38	0.16	4.1	1.5	5.7	1.3	0.72	0.37	20.9	2.5	6.48	0.63	77.3	6.2	25.2	1.7	107	6.2	24.7	1.5	251	14	31.3	2	9460	560	1.9	0.24	150.3	9.5	149	11	23.3	3.7	689	31
RVK1	RVK1_34	1857	22	4	1.3	48	13	10.5	3.3	93	28	72	14	24.8	3.6	252	26	57.7	5.1	475	41	113.7	9.3	378	37	73.7	8.2	627	75	75.1	9.6	8830	570	1.41	0.24	244	41	289	39	17	5	2780	210
RVK1	RVK1_35	1556	31	0.064	0.018	28.9	1.4	0.181	0.029	2.54	0.26	6.02	0.84	1.36	0.19	30.1	2	10.38	0.57	133.2	5	47.2	1.9	217.1	7.6	52.1	1.9	528	23	70.5	2.7	9320	380	1.04	0.18	109.5	5.8	120.4	6.9	10.9	2.6	1267	43
RVK1	RVK1_37	1720	25	2.27	0.83	25.7	6.7	4	1.2	29.3	8.7	19.3	5.2	3.8	1.1	42.7	8.4	15.9	2.6	209	29	78.9	9.5	372	39	94.4	9.1	987	87	134	13	10010	570	2.16	0.38	131	31	245	31	15.9	5	2170	250
RVK1	RVK1_45	1471	87	1.31	0.39	19.7	4.4	5	1.5	51	16	37	9.8	8.8	2.3	86	20	21.1	4	209	34	68	22	244	33	51.6	5.4	440	42	69.4	9.3	8010	760	0.75	0.22	144	17	80	13	35.7	4.7	1700	270
RVK1	RVK1_52	1182	37	0.152	0.097	44.2	4.2	0.172	0.044	2.44	0.54	3.62	0.61	1.1	0.31	15.3	2.1	5.45	0.48	67.1	4.6	23.5	1	109.1	4.7	28.3	1.1	309	12	40.1	1.3	9520	390	2.29	0.23	98.5	3.8	107.3	5.5	21.4	2.8	650	40
RVK1	RVK1_53	1635	23	0.007	0.014	43.5	2.1	0.066	0.017	1.53	0.19	4.14	0.69	1.27	0.17	20.8	1.7	7.4	0.46	88.7	4.9	32.8	1.7	148.1	8.4	36.6	2	367	21	49.8	2.6	8860	490	2.2	0.2	114.2	6.9	149	11	14.2	3.1	907	31
RVK1	RVK1_60	1138	44	0.019	0.013	12.86	0.56	0.113	0.055	1.4	0.4	3.46	0.79	0.28	0.16	10	1.2	3.6	0.25	42.3	2.5	14.78	0.84	65.6	3.7	16.03	0.97	160	8.8	20.6	1.3	10290	450	1.59	0.22	106.6	5.6	106.9	7.2	22.7	3.4	403	17
RVK1	RVK1_61	1131	30	0.032	0.012	20.18	0.99	0.186	0.035	2.59	0.39	4.02	0.52	0.5	0.16	15.5	1.4	5.3	0.4	65.8	4.6	23	1.2	102.4	5.6	26.7	1.5	264	17	34.1	1.9	10780	530	2.63	0.26	275	16	286	19	19.4	3	643	28
RVK1	RVK1_63	1735	29	0.088	0.081	8.85	0.76	0.26	0.21	3	2.3	3	1.5	0.9	0.61	9.2	3.4	2.69	0.79	30	6.3	9.8	1.1	46.7	4.2	12.4	0.95	137.9	8.4	21.2	1.3	10660	580	0.79	0.18	53	4	124.2	7.4	8.9	2.9	281	27
RVK1	RVK1_64	1186	35	0.025	0.015	46.7	2.2	0.144	0.066	2.38	0.64	4.72	0.64	1.13	0.18	20.6	1.6	6.44	0.46	77.5	4.3	26.7	1.5	121.7	7.5	30.5	1.9	317	20	41	2.7	8750	530	2.05	0.2	152.3	9.9	107.6	7.1	18.2	3	756	30
RVK1	RVK1_66	1805	32	3.01	0.17	46.1	2.5	8.11	0.66	74.1	5.8	49.2	4.9	14.6	1.6	84.6	6.2	20.5	1.4	178.3	9.9	46	2.3	175.1	9.8	39.9	2.1	399	20	51.9	3	9570	470	1.4	0.17	113.8	6.6	211	14	40.4	5.6	1154	54
RVK1	RVK1_69	1236	33	1.05	0.25	27.7	1.6	4.7	0.92	51	11	44	10	16.1	5.8	151	60	34	11	278	81	65	15	231	42	46.8	6.9	405	52	59.6	5.1	10810	910	1.61	0.37	192	12	316	26	12.6	7.9	1780	510
RVK1	RVK1_72	1519	31	2.94	0.42	61	5.5	8	1.5	70	12	49.8	9.6	13.8	2.6	80	11	18.9	2.3	174	21	47.4	4.7	184	15	44.6	3.4	447	32	58.6	4.4	10580	560	3.8	0.34	252	22	301	25	31.2	4.6	1194	99
RVK1	RVK1_75	1090	50	0.0207	0.0087	17.5	3.7	0.095	0.039	1.34	0.35	3	1.3	0.324	0.098	12.6	3.1	4.4	1.2	57	17	21.6	7.8	94	28	25.4	8.1	267	90	35	11	10800	3500	1.53	0.59	53	15	76	32	22.8	3.5	515	44
RVK1	RVK1_76	1157	29	0.22	0.27	35	29	0.31	0.35	3.1	2.4	8.3	8.3	1.2	1.9	28	20	9.5	8	130	120	41	37	160	130	40	34	400	340	46	34	17000	15000	4.8	5.3	360	300	320	280	20.3	4.8	730	200
RVK1	RVK1_80	1189	27	0.249	0.076	36.9	1.5	0.78	0.12	7.6	1.1	6.65	0.96	1.76	0.32	16.4	2.3	4.87	0.59	52.8	4.7	17.9	1.3	86.3	5.2	25.3	1.4	296	18	44.7	2.2	10670	460	1.96	0.26	186.8	9.9	265	15	12.7	3	538	25
RVK1	RVK1_82	1666	31	1.2	0.34	37.2	2.4	3.24	0.76	33.4	7.5	30.4	7.4	8	2	71	18	17.3	4.2	165	35	45	8.1	171	26	38.2	4.4	361	35	55.3	6.2	8470	710	0.96	0.19	132	11	133.9	9.7	14.9	3.8	1140	190
RVK1	RVK1_84	1188	48	0.28	0.29	22	1.1	0.171	0.09	1.79	0.38	3.3	0.47	0.62	0.12	13.7	1.4	4.98	0.37	64.7	4.3	23.4	1.4	106.7	5.8	28.2	1.6	293	18	39.2	2.3	9290	500	1.68	0.22	88.3	5.4	78.4	5	31.1	3.5	661	22
RVK1	RVK1_89	1310	26	2.03	0.17	21.6	2.1	4.73	0.46	40.9	4.5	21.9	2.2	4.99	0.55	63.9	5.3	18	1.3	201	12	65.2	4	278	18	68.4	4.1	671	47	90.1	6	10250	580	0.99	0.18	87.2	6.1	293	20	16.7	3.3	1788	76
CRP04	CRP04_1	1088	8.3	0	0.017	9.39	0.58	0.109	0.026	2.92	0.54	4.92	0.68	0.24	0.13	21.4	2.8	7.39	0.8	88.8	6.8	30.6	2.6	129.4	8.2	30.2	2.2	287	17	35.8	2.2	9100	160	0.84	0.16	153	15	152.8	7.7	16.4	3.4	839	60
CRP04	CRP04_2	811	6.9	0.02	0.017	22.8	1.1	0.045	0.012	0.62	0.11	1.64	0.41	0.72	0.12	9	1.2	3.11	0.28	44.6	3.9	17.8	1	90.2	4.9	26.9	1.5	348	15	48.9	1.8	8510	200	1.51	0.19	135.4	7.2	243.7	8.4	3.3	1.4	553	32
CRP04	CRP04_3	993	5.2	1.6	1.2	21.4	5	1.31	0.81	9.4	3.9	9	2.2	0.47	0.26	42.3	6.1	13.3	1.4	162	17	55.5	5.5	246	24	55	5.6	509	51	65.1	6.1	10550	230	2.09	0.22	317	46	418	65	10.7	3	1530	140
CRP04	CRP04_4	701	15	0.045	0.019	13.6	2.7	0.481	0.067	6.6	1	10.7	1.9	0.06	0.12	43.4	7.3	12	1.7	142	21	45.6	6.2	185	26	39.9	5.3	402	52	52.1	6.9	8470	280	1.59	0.26	164	31	125.9	6.6	2.4	2.5	1120	160
CRP04	CRP04_5	901	15	0	0.023	6.25	0.93	0.065	0.035	1.14	0.24	2.61	0.97	0.71	0.26	8.5	1.9	2.74	0.16	21.5	2.8	4.48	0.6	14.8	1.9	2.45	0.44	21.7	3.4	2.51	0.43	10470	360	0.59	0.31	81	12	179.6	8.8	0.9	2.7	128	9.3
CRP04	CRP04_6	1106	14	0.016	0.02	7.14	0.83	0.029	0.013	0.73	0.15	1.73	0.49	0.32	0.14	11.5	2.1	3.91	0.45	48.5	6.4	17.2	2.7	79	13	19.7	3.2	193	35	25.8	4.6	10070	220	2.19	0.36	46.5	3.2	102.1	8.5	4.1	2.8	466	70
CRP04	CRP04_7	971	5.2	0	0.013	0.621	0.084	0.037	0.011	0.89	0.14	5.05	0.68	0.066	0.089	33.5	2.8	11.72	0.82	113	9	22.3	1.9	54.4	5.4	8	1.1	47.1	7.4	4.25	0.77	12520	170	0.55	0.12	56.8	5.3	410	31	8.1	2.1	664	47
CRP04	CRP04_8	610	5.7	0.008	0.013	47.9	3.8	0.134	0.02	2.15	0.17	3.85	0.71	2.18	0.28	15.6	1.8	5.17	0.33	57.8	3.7	19.4	1.2	83.2	4.3	20.5	1	224.9	8.4	29.5	1.1	10890	180	0.96	0.16	199	12	123	5.4	25.3	5	570	31
CRP04	CRP04_9	1093	8.1	0.02	0.013	8.54	0.3	0.024	0.014	0.56	0.15	1.81	0.48	0.02	0.1	9.1	1.9	3.65	0.24	48.6	2	18.17	0.78	81	1.9	19.7	0.66	196.7	5.5	26.94	0.73	10820	110	2.34	0.29	98.1	2.3	229.1	5.1	10.5	2.8	497.7	6.5
CRP04	CRP04_10	999	8.5	0.074	0.025	3.51	0.46	0.057	0.015	1.79	0.34	7.8	1.2	0.18	0.16	59.1	7.8	24.8	3	329	44	122	14	534	76	128	19	1250	190	163	21	13440	710	3.05	0.52	348	28	1720	270	7.6	2.6	3330	490
CRP04	CRP04_11	1406	18	0.008	0.016	2.12	0.25	0.017	0.011	0.09	0.12	0.34	0.34	0.55	0.19	3.2	1	2.1	0.31	40.3	4.7	19.9	1.4	130	10	43.7	3.1	607	36	94.6	8.1	13620	690	40	3.3	42.5	5	1292	55	1.9	1.9	676	51
CRP04	CRP04_12	989	5.6	0.09	0.13	12.5	1	0.132	0.049	2.46	0.51	6.9	1.2	0.33	0.13	32	3	11.15	0.82	142	10	50	3.3	217	13	50.4	3	486	27	62	2.8	10100	200	1.95	0.22	249	20	339	19	6.4	2.8	1380	85
CRP04	CRP04_13	988	7.2	0	0.016	2.76	0.3	0.131	0.022	2.6	0.34	7.3	1	0.2	0.11	46.2	5.2	17.8	1.6	226	19	78.1	7.1	330	29	74.7	6.5	718	55	89.4	7.2	11060	250	0.71	0.11	151	16	178.9	7.8	13.8	2.5	2150	180
CRP04	CRP04_14	1486	8.5	0.02	0.015	7.62	0.75	0.06	0.02	1.65	0.38	2.84	0.68	0.62	0.15	15.6	3	5.13	0.89	74	12	27.4	3.8	140	18	39.4	5.2	450	55	64.5	7.1	9490	180	0.64	0.12	293	57	450	59	7.6	3.1	820	100
CRP04	CRP04_15	637	8.2	0.022	0.012	3.61	0.22	0.033	0.012	0.45	0.12	1.33	0.4	0.03	0.11	7.7	0.97	2.86	0.2	38.6	2.3	13.39	0.87	63.2	3.7	15.7	1	168	11	22.9	1.2	10570	280	1.32	0.16	80.8	8.5	363	32	11.1	3	382	21
CRP04	CRP04_16	1108	11	0.14	0.2	12.6	2	0.242	0.092	4.24	0.67	8.8	0.87	1.03	0.21	42.2	2.9	14.94	0.84	183.3	9.7	60.9	3.2	269	16	65.7	3.6	668	37	85.9	4	9110	270	1.96	0.33	244	20	602	54	3.2	2	1689	95
CRP04	CRP04_17	1607	20	0.035	0.02	52.3	5.7	0.23	0.064	3.56	0.94	6.8	1.7	1.19	0.32	25.1	5.8	9.4	1.6	120	20	42.9	7.3	202	34	48.8	8.1	512	84	67	10	10440	230	4.89	0.82	590	120	720	140	9.4	2.9	1270	210
CRP04	CRP04_18	941	6.4	0.014	0.014	12.01	0.36	0.039	0.013	0.88	0.18	1.85	0.56	0.05	0.11	7.9	1.3	4.01	0.31	55.7	2.3	19.75	0.79	96.3	2.8	24	1.1	241	8.6	29.1	1.3	12170	220	19.3	1.7	261	6.2	665	43	9.2	3.3	642	13
CRP04	CRP04_19	1857	96	0.045	0.038	9.54	0.74	0.038	0.02	0.6	0.21	3.67	0.88	0.08	0.11	32.6	4.5	15.6	2.2	254	39	112	17	632	99	182	28	2020	320	287	45	20700	1700	92	20	565	56	5400	1000	33.8	8.5	3660	610
CRP04	CRP04_20	1957.7	14	0.038	0.015	21.81	0.9	0.486	0.033	7.59	0.28	13.6	1.3	0.58	0.14	68.3	4.9	23.2	1.3	312	17	106.5	6.1	464	28	99.5	5.5	936	56	114.1	6.6	9610	240	11.66	0.6	640	36	728	40	26.8	4.7	2960	160
CRP04	CRP04_21	993	9.9	0.01	0.016	1.7	0.34	0.089	0.031	1.64	0.38	5.23	0.83	0.094	0.093	30	3.2	10.81	0.86	117	11	31.9	3.9	117	17	24.9	3.6	227	33	24.8	4	10680	260	1.32	0.18	168	29	779	41	7.4	2.9	853	93
CRP04	CRP04_22	952	7.1	0.006	0.011	7.36	0.73	0.0077	0.0089	0.282	0.099	1.08	0.33	0.135	0.078	9.31	0.94	4.5	0.22	68.4	2	26.64	0.82	135.2	7.5	35.6	2.3	396	28	55.5	4.8	12170	240	5.5	0.34	79.3	6.2	533	69	10.1	3.8	786	28
CRP04	CRP04_23	1415	10	0.014	0.022	6.21	0.64	0.277	0.042	6.42	0.77	12.9	1.3	1.15	0.21	55.4	4.3	14.7	1.3	176	13	58.8	4.1	239	17	53.6	4.1	521	36	64.4	4	8930	160	0.77	0.16	196	23	268	30	5.5	2.6	1520	110
CRP04	CRP04_24	3601	37	0.003	0.016	7.82	0.31	0.092	0.025	1.95	0.21	4.05	0.65	1.4	0.2	12.4	2.1	3.5	0.29	36.3	2	12.08	0.48	47.3	2.9	10.95	0.56	108.2	6.1	13.51	0.81	7070	170	0.33	0.12	15.6	1	26.4	3.1	9.3	3.5	321.5	7.6
CRP04	CRP04_25	797	11	0.33	0.63	16.5	1.7	0.21	0.16	3.08	0.92	7.3	1.8	0.13	0.13	33.3	4.1	10.6	1.1	134	12	45.3	4.3	199	18	47.6	4.7	467	35	58	4.6	9700	170	2.58	0.52	167	13	297	34	7.1	3.2	1230	100
CRP04	CRP04_26	1184	16	0.039	0.023	10.9	1	0.359	0.048	7.5	1.1	15.5	2.8	0.87	0.22	67	10	19.6	2.6	217	24	69.4	7.5	281	31	63.5	6.8	604	53	73.8	7	9960	200	2.89	0.6	293	44	355	44	24	8.9	1930	200
CRP04	CRP04_27	1609	14	0.009	0.019	11.45	0.55	0.068	0.02	1.44	0.19	4.07	0.91	0.16	0.1	25.9	2.3	8.6	0.59	119.3	8	43.1	2.6	193	12	48.2	3.5	498	41	64.1	6	10600	290	1.8	0.24	190	29	410	87	4.2	3	1215	71
CRP04	CRP04_28	2545	35	0.175	0.073	35.2	2.5	0.47	0.086	5.77	0.72	8.2	1.5	3.52	0.43	31.7	4.3	8.2	1.1	98	11	32.4	3.8	144	17	38	3.8	416	35	50.3	5.2	8140	400	0.53	0.2	197	27	314	30	6.3	4.3	860	96
CRP04	CRP04_29	1877.4	9.7	0	0.016	0.65	0.15	0.021	0.017	0.49	0.21	2.68	0.76	0.01	0.14	18.2	2.4	7.84	0.56	93.9	6.4	26.9	2.3	97.4	9.9	19.5	1.9	173	17	20.6	2.4	11450	300	1.09	0.24	61.8	2.7	690	35	5.6	3.1	794	60
CRP04	CRP04_30	1249	18	0.001	0.015	4.7	1.5	0.022	0.011	0.48	0.17	1.39	0.59	0.28	0.11	9.5	2.8	3.8	1.2	53	16	17.6	5.7	82	27	17.9	6.3	197	65	26.8	9.1	11460	240	1.15	0.29	68	26	279	21	5.7	2.3	510	160
CRP04	CRP04_31	951	26	0.059	0.018	1.12	0.17	0.066	0.02	1.27	0.18	4.53	0.5	0.05	0.088	31.4	2.4	14.72	0.88	179	11	46.9	3.8	163	23	34.1	6.1	319	69	37.2	8.7	14260	520	5.3	1.1	109.9	5.3	1250	140	6.9	2.3	1400	110
CRP04	CRP04_32	2488	17	0.046	0.023	22.5	1.9	0.41	0.11	6.6	1.5	10.3	2	1.04	0.28	42.5	7.1	12.1	1.8	142	19	46.6	5.6	190	20	45.1	4	446	34	59.3	4.8	9240	330	1.29	0.19	353	48	408	61	16.4	3.6	1240	140
CRP04	CRP04_33	1006	6.4	0.017	0.018	0.84	0.11	0.099	0.027	2.21	0.24	12.2	1.3	0.27	0.13	78.8	5.3	21.08	0.91	123.4	5.1	15.69	0.75	29.6	1.7	3.82	0.31	26.1	1.9	2.36	0.27	13080	380	0.64	0.18	141.1	4.2	762	23	6.3	2.3	456.6	9.3
CRP04	CRP04_34	3154.8	18	0.015	0.024	10.92	0.41	0.069	0.026	1.77	0.26	6.29	0.81	0.94	0.18	44.9	5.4	16.8	1.4	226	15	79.8	5.4	350	20	81.3	4.1	785	44	100.9	5.6	8810	270	4.21	0.58	188	15	503	24	15.7	4.8	2180	140
CRP04	CRP04_35	892	8.8	0.136	0.027	7.68	0.27	0.64	0.049	9.58	0.73	16.5	2.1	1.04	0.15	69.8	6.2	20.2	1.6	237	20	74.1	6.1	291	19	62.6	3.7	595	34	73.4	3.4	8340	180	2.73	0.38	217	17	315	15	3.7	2.1	1960	130
CRP04	CRP04_36	1611	13	1.28	0.49	11.8	2	1.05	0.21	10.1	1	14	2.7	1.27	0.41	60.2	8.2	19.3	2.7	247	33	87	10	366	39	83.5	9.1	849	76	103	10	7390	380	1.45	0.39	159	20	220	23	18.6	3.7	2380	260
CRP04	CRP04_37	1582	12	0	0.016	16.8	0.98	0.044	0.016	1.27	0.2	3.61	0.59	0.58	0.13	23.6	2.9	8.81	0.83	110	10	40.9	3.7	181	15	43.3	3.6	430	25	56.3	3.4	10350	120	1.46	0.25	148	12	145	16	6.6	2.6	1114	84
CRP04	CRP04_38	2473	10	0.1	0.04	15.5	0.66	0.295	0.03	4.37	0.48	6.4	1.1	0.58	0.2	24.1	3.1	7.15	0.46	76.1	3.2	23.06	0.93	91.6	4.1	20.21	0.87	191.6	7.2	24.9	1.1	10450	270	0.7	0.21	186	5.4	156	4.9	41.9	5.7	647	14
CRP04	CRP04_39	814	7.2	0.023	0.021	8.57	0.4	0.199	0.037	4.42	0.48	9.1	1.1	0.25	0.15	40.6	3.6	12.57	0.9	157	8.7	51.3	2.5	211.3	9.3	48.2	2.7	449	19	54.9	2.5	9810	320	1.38	0.22	201.1	8.8	255.5	8.4	15.3	3.4	1392	51
CRP04	CRP04_40	830	14	0.098	0.062	11.55	0.57	0.169	0.046	2.43	0.35	7.6	1.1	0.22	0.14	38.6	2.6	14.34	0.97	195	14	71.4	4.5	334	23	83.6	6.5	900	80	110.8	8.9	10900	260	7.3	2.7	456	34	1060	140	1.7	2.8	1970	110
CRP04	CRP04_41	1561	10	0.004	0.014	13.23	0.56	0.033	0.013	0.8	0.15	2.15	0.59	0.081	0.099	13.9	2.4	5.91	0.6	84.7	9	31.8	3.1	153	15	37.4	3.5	394	34	53.9	4.6	11360	170	2.34	0.28	168	21	227	22	6.6	2.3	904	89
CRP04	CRP04_42	564	3.6	0.74	0.8	18.2	3.3	0.9	1.1	3.1	2.6	5.9	1.4	0.24	0.12	30.1	4	13	1.2	187	18	69	7.3	354	43	96	12	1000	130	134	18	16700	1500	39.9	9.4	428	47	3310	500	5.8	2.2	2040	220
CRP04	CRP04_43	2611	31	0	0.015	5.77	0.48	0.02	0.011	0.29	0.11	0.88	0.33	0.4	0.13	6.8	1.2	2.04	0.19	25.9	1.7	9.87	0.58	46.3	3.3	12.29	0.9	147	11	22.1	1.5	9770	280	0.62	0.22	32.9	5.2	297	63	8	3.8	297	16
CRP04	CRP04_44	2454	27	0.014	0.017	3.32	0.18	0.201	0.031	3.67	0.28	7	1.1	0.01	0.15	17.4	1.9	4.34	0.5	31.8	2.1	7.52	0.48	22.7	1.9	4.31	0.43	37.2	2.3	3.96	0.31	10640	180	0.49	0.2	279	12	154.1	6	22.6	5.9	215.4	7.3
CRP04	CRP04_45	1511	17	0	0.012	19.23	0.75	0.018	0.011	0.5	0.12	1.2	0.36	0.4	0.14	6.5	1	2.16	0.15	32	2.1	12.4	0.66	62.5	3.3	17.6	0.81	210	10	32	1.4	11190	190	2.35	0.27	83.1	2.9	334	32	2.9	2	366	17
CRP04	CRP04_46	1068	7.7	0.012	0.015	10.63	0.44	0.08	0.019	1.64	0.25	3.76	0.73	0.06	0.11	17.9	2.1	6.1	0.52	79.6	5.4	28.4	2.1	118.9	7.2	28.3	1.7	283	16	35.7	1.5	9530	200	1.57	0.18	153.8	6.8	236.3	6.9	10.9	3.2	730	37
CRP04	CRP04_47	2391	24	0.002	0.016	5.05	0.41	0.108	0.018	2.03	0.35	3.3	1.1	0.56	0.26	5.3	1.6	1.69	0.28	13.9	1.8	3.08	0.48	12.1	1.4	2.05	0.2	18.4	1.4	1.79	0.28	11750	330	0.096	0.093	127.2	9.3	55.1	1.8	33.4	4.6	99.5	4.9
CRP04	CRP04_48	2468	17	0.001	0.015	6.69	0.34	0.106	0.02	2.12	0.17	6	1	2.01	0.33	18.4	2.3	4.18	0.3	32.3	2.4	6.65	0.52	19.8	1.7	3.4	0.3	30.2	2.2	3.38	0.28	10940	150	0.233	0.097	68.4	5.8	313	25	39.9	5.5	185	11
CRP04	CRP04_49	983	7.4	0.018	0.014	5.42	0.8	0.029	0.012	0.86	0.19	2.65	0.65	0.276	0.091	16.7	2.6	5.2	0.66	58.4	9.4	18.4	3.7	74	15	16.8	3.7	155	36	19.1	4.5	11010	160	1.65	0.24	115	17	524	15	5.7	2.2	490	91
CRP04	CRP04_50	970	5.8	0.004	0.014	0.83	0.21	0.05	0.015	0.94	0.23	5.11	0.85	0.14	0.13	33.5	3.6	11.7	1.4	107	18	25.5	6.5	81	29	14	5.9	123	55	12.1	6.2	11960	300	0.52	0.13	53.2	5.4	392	28	2.7	2.3	590	110
CRP04	CRP04_51	2478	26	0.003	0.035	2.45	0.3	0.062	0.028	1.41	0.4	3.08	0.94	0.33	0.24	16.4	3.8	5.08	0.69	70.2	8.2	22.7	2.4	104	10	24.4	2.3	226	19	29.7	2.1	9630	200	0.46	0.16	64.9	8.7	126	11	19.4	5.3	666	68
CRP04	CRP04_52	1102	5.9	0.025	0.016	13	1.2	0.138	0.03	3.13	0.51	5.5	1	0.122	0.089	30.2	3.8	10.6	1.2	136	15	48	5.1	202	20	47.3	4.6	451	38	56.8	4.8	10530	160	3.25	0.41	273	39	429	53	6.2	2.5	1280	130
CRP04	CRP04_53	2539	19	0.038	0.036	6.9	1.1	0.18	0.17	2.4	1.7	5.9	3.5	2.15	0.71	34	13	12.6	3.1	171	35	60.6	6.2	282	21	75.9	4.2	853	49	114.7	5	11000	280	4.4	1.8	13.7	1.5	117	24	7	3.2	1620	100
CRP04	CRP04_54	1083	13	0.011	0.021	3.93	0.39	0.039	0.017	0.76	0.19	2.2	0.41	0.28	0.16	16	2.1	6.5	0.66	82.7	6.2	30.6	2.6	144	14	35	3.5	376	41	45.9	3.8	10520	360	2.56	0.56	124	20	410	110	7.7	3.5	830	62
CRP04	CRP04_55	2263	190	0.01	0.028	2.57	0.25	0.156	0.019	2.68	0.83	5.8	2.7	0.27	0.24	9.3	2.6	2.54	0.36	19.1	1.9	4.9	1.3	22.4	6	5.1	1.1	43	11	6.2	2.3	11210	520	0.62	0.38	139	15	580	160	16.5	6	144	17
CRP04	CRP04_56	2380	27	0.022	0.029	2.23	0.25	0.201	0.044	3.57	0.32	5.43	0.92	0.06	0.15	10.9	1.4	2	0.2	16.1	1.2	3.35	0.28	10.36	0.64	1.79	0.18	15.1	1.5	1.82	0.24	11260	210	0.52	0.17	153.5	6	218	11	29.2	5.1	99.2	3.4
CRP04	CRP04_57	1106	6	0.003	0.013	4.82	0.19	0.05	0.013	0.92	0.15	1.78	0.35	0.084	0.067	9.7	1.1	3.49	0.22	43.6	1.5	14.93	0.53	69.6	2.4	16.81	0.53	174.2	4.9	23.79	0.88	10260	180	1.81	0.19	170.3	5.1	508	23	10.3	2.1	423.4	8.1
CRP04	CRP04_58	2426	13	0.011	0.015	13.11	0.29	0.055	0.011	1	0.18	2.52	0.49	0.28	0.12	12	1.1	4.11	0.18	51.8	2.1	18.31	0.54	82.6	2.5	21.35	0.7	226	5.6	29.86	0.75	10860	160	1.45	0.19	88.4	2	95.5	2.2	13.7	3.4	535.1	7.7
CRP04	CRP04_59	994	6.8	0.225	0.095	14.7	1.7	0.45	0.18	5.3	1.5	9.6	1.9	0.79	0.22	47.2	6.1	16.1	2.2	191	22	59.3	7.2	249	30	56.1	6.5	539	61	65.5	7.8	10990	160	2.62	0.37	534	61	729	63	9.3	3.1	1550	160
CRP04	CRP04_60	596	3.2	0.007	0.014	9.93	0.36	0.014	0.016	0.51	0.17	3.26	0.9	1.33	0.28	32	3.1	14.57	0.86	208.1	6.5	78	3.6	377	12	99.2	2.9	979	34	127.9	4.9	14230	360	11.88	0.74	687	32	4660	140	7.7	2.6	2315	76
CRP04	CRP04_61	2414	64	0.05	0.021	59	6.6	0.332	0.065	6.6	1	10.3	1.4	2.38	0.5	47.6	3.5	13.2	1.3	156.2	8.9	48.4	3.6	209	18	48.7	3.9	457	40	61.9	5	9070	250	1.46	0.36	230	33	192	35	5.4	3.9	1340	120
CRP04	CRP04_62	577	3	0.002	0.011	5.69	0.25	0.035	0.011	0.61	0.14	2.23	0.41	0.46	0.12	11.4	1.1	3.35	0.18	41	2.5	12.8	0.98	56.3	5	12	1.3	118	13	15.5	1.9	10630	210	3.35	0.3	55.7	4.4	609	29	6.4	1.7	391	29
CRP04	CRP04_63	1628.3	16	5.6	3.9	30.7	8.7	2.6	1.1	15.5	5.1	11.9	2.2	1.37	0.29	48.2	5.4	14.5	1.2	193	12	68	4.3	309	19	70.4	4.2	704	45	93.1	5.7	10360	570	1.79	0.36	316	35	540	96	3.7	2	1900	120
CRP04	CRP04_64	1875	11	0.008	0.018	14.84	0.48	0.16	0.024	3.37	0.32	8.78	0.97	2.81	0.38	59.6	3.8	20.44	0.69	268	5.9	96.6	2.4	432	14	100	2.7	1008	25	134.5	4.2	9050	150	1.57	0.3	140.8	5	236.2	9.3	7.3	3.4	2523	49
CRP04	CRP04_65	1013	7.2	0.011	0.011	1.45	0.18	0.13	0.026	2.68	0.44	8.2	1.2	0.301	0.089	45.8	4.8	14.8	1.4	164	16	46.6	5.4	173	24	35.5	4.7	310	42	34.6	5.2	9960	200	0.6	0.1	90.2	8.4	304	21	14.3	2.9	1260	150
DA1	DA1_1	998	6.2	0.035	0.017	11.47	0.65	0.304	0.023	6.09	0.35	11.6	1.3	1.23	0.17	62.9	2	21.49	0.75	285	7.6	101.1	2.8	447	12	100.3	2.2	926	22	118.3	2.9	8230	190	2.2	0.17	329	12	383	16	2.7	2.1	2774	50
DA1	DA1_3	1858.3	16	0.3	0.23	12.3	4	0.47	0.33	2.7	2	4.2	1.3	0.42	0.32	13.3	2.9	4.3	0.45	58.7	4.2	21.7	1.4	104.7	3.4	26.12	0.95	269.4	9.8	36.1	2	11780	300	1.86	0.3	126.5	7	398	10	10.6	3.9	641	23
DA1	DA1_5	848	6.3	0.83	0.15	34.6	2.7	1.36	0.25	11.9	1.8	19	2.1	2.62	0.47	61.1	5.1	19.3	1.1	227	10	71.9	2.4	290	11	63.2	2.7	600	26	71.6	2.4	9220	210	2.78	0.26	328.4	7.7	392	15	14.3	5	1894	63
DA1	DA1_6	1863	17	0.48	0.13	16.2	2.4	0.76	0.11	7	1.1	14.4	2.1	2.04	0.46	45.8	4.3	12.58	0.61	136.9	8.8	37.7	1.5	144.3	6.1	31.5	1.9	302	13	37.9	2.3	10060	260	0.82	0.25	107.6	3.9	230	12	17.4	7	1059	44
DA1	DA1_7	1334	9.6	0.053	0.02	12.61	0.74	0.37	0.033	5.62	0.42	8.6	1	0.46	0.16	45.1	3.8	14.64	0.54	190.8	6.6	66.4	2.7	298	11	71.1	2.3	710	20	89.6	3.4	8980	290	4.26	0.32	141.2	5.3	227	10	8.2	3.2	1800	47
DA1	DA1_8	1619	13	0.126	0.033	12	3.3	0.397	0.045	6.37	0.69	9	1.1	0.39	0.14	37.6	3.5	12.51	0.77	155.8	8	49.7	3	212	11	48.5	1.6	464	27	55.9	2.7	9970	290	0.96	0.22	220	30	217.4	4.7	8.5	3.3	1365	78
DA1	DA1_9	1776	11	0.035	0.016	7.6	1.1	0.08	0.022	1.38	0.14	4.41	0.6	0.34	0.13	31.4	2.1	11.12	0.43	132.3	3.8	37.5	1.1	138.5	3.9	27.07	0.83	245.7	6.5	26.84	0.87	11750	290	1.15	0.2	74.2	1.9	142.7	3.8	9.9	2.7	1077	23
DA1	DA1_10	1898	57	1.4	0.27	75.7	1.3	1.96	0.39	15.5	2.1	17.8	3.1	6.3	1	52.5	5.3	15.5	0.79	179.6	7.5	58.3	4	279	22	78.4	8.1	890	120	115	15	9660	430	2.49	0.5	159	19	347	63	17.1	3.6	1620	110
DA1	DA1_11	2387	16	0.705	0.044	65.5	2.2	1.23	0.063	11.58	0.57	17.2	1.6	5.51	0.44	52.1	3.6	14.34	0.57	153.1	5.5	43.8	1.3	179.5	5.2	42.2	1.3	396	16	51.1	1.8	8100	190	1.1	0.23	251	9.5	127.5	5.1	23	4.6	1196	27
DA1	DA1_14	2494	20	0.033	0.019	13.7	0.73	0.032	0.019	0.53	0.13	0.56	0.3	0.47	0.2	6.9	1.2	1.91	0.17	23.5	2.1	8.34	0.5	41.6	2.2	10.63	0.58	119.7	6.1	17.61	0.71	9060	190	0.48	0.15	64.6	1.6	118.4	5.1	6.6	2.5	238	4.9
DA1	DA1_17	1713	16	0.024	0.027	10.02	0.57	0.09	0.017	1.86	0.38	3.61	0.9	0.19	0.23	19	2.4	6.94	0.38	86.4	3.8	30.3	1.6	129.8	5.3	29.3	1.5	301	13	37.8	1.8	9560	190	1.61	0.28	117.4	7.4	140	7	5.3	4	781	24
DA1	DA1_18	702	12	3	2.3	42.5	9	2.3	1.1	19.3	6.8	18.4	3.3	1.71	0.35	58.2	7.6	17.6	2	221	24	71.6	7.8	298	31	70.3	6.9	719	58	79.6	8.5	7380	370	0.93	0.23	211	23	433	32	8.3	3.6	1840	210
DA1	DA1_20	1346	14	0.136	0.026	8.33	0.51	0.177	0.032	1.71	0.34	2.32	0.87	1.03	0.23	7.8	1.5	2.28	0.28	27.6	1.7	10.38	0.59	52	1.6	15.55	0.79	207	12	34.8	1.6	11660	340	1.58	0.27	44.1	4.2	284	14	6.6	2.7	318.9	9.9
DA1	DA1_22	1059	38	0.022	0.03	5.1	2.4	0.027	0.026	0.41	0.22	0.66	0.53	0.05	0.22	7.5	4.1	3.4	1.5	49	17	19.2	4.1	97	15	27	2.8	299	17	42	2.5	12410	500	6	1.4	60	34	331	46	0.6	6.6	496	92
DA1	DA1_23	1708	14	0	0.021	13.59	0.4	0.056	0.018	1.14	0.2	2.46	0.63	0.11	0.14	12.6	2.1	4.59	0.3	57.1	2.3	20.23	0.7	88.4	3.5	20.29	0.77	208.3	6.9	28.3	1.3	10470	210	1.48	0.21	134.3	3.7	86.2	2.4	10	3.6	551	10
DA1	DA1_24	1864	17	0.161	0.034	30.6	1.9	0.39	0.038	6.29	0.51	11.4	1.1	1.66	0.34	39.4	3.2	12.14	0.8	135.5	7.1	42	1.9	175.2	7.5	39.3	1.7	396	19	42.7	1.9	8240	300	0.93	0.13	186.7	7.5	127.9	7.5	24.8	6.4	1134	48
DA1	DA1_25	1221	6.7	3.15	0.21	77.8	4.2	4.83	0.41	36	3.2	39.3	4.1	9.4	0.87	78.5	6.6	21.5	1.6	219	15	66.3	4	269	16	58.5	2.8	560	29	70.3	3	8980	200	1.52	0.19	273.7	8.8	316.4	9.6	22.3	4.8	1714	84
DA1	DA1_26	1013	7.5	0.21	0.073	7.6	1.5	0.305	0.082	3.08	0.73	5.73	0.82	1.18	0.24	28.7	2.1	11.55	0.64	164.9	7.1	62.4	2.6	296	11	72.9	2.7	759	15	92.7	2.4	10600	200	1.17	0.24	56.7	4.2	289	17	9.7	2.8	1727	56
DA1	DA1_27	1826	20	3.39	0.95	79	22	4.5	1.2	31.4	8	27.3	8.2	7.2	1.9	49.4	9.7	13.5	2.1	151	18	46.1	4.9	220	16	59.1	5	645	54	80.3	7.1	11280	350	1.85	0.49	88	17	607	33	15.6	7	1278	86
DA1	DA1_28	1064	18	0.015	0.018	3.3	1.3	0.03	0.025	0.47	0.29	0.77	0.47	0.06	0.22	1.8	2.2	1.67	0.83	21.2	9.2	9.7	3.6	58	11	18.2	1.3	255	18	44.3	2.9	10400	400	5.2	1.4	33	22	363	88	0.3	5.6	278	60
DA1	DA1_29	1715	14	0.021	0.018	17.56	0.74	0.162	0.02	3.25	0.31	7.28	0.92	0.32	0.11	31.3	3.3	10.25	0.56	124.8	5.6	42.1	2.2	182.3	7.5	40.5	2.1	409	14	50.9	1.8	9990	190	1.91	0.22	249	9.4	150.7	5.3	10.3	3.1	1111	36
DA1	DA1_30	1338	16	0.074	0.047	7.4	1.1	0.103	0.049	0.81	0.27	1.91	0.79	0.54	0.16	5.2	2.2	1.22	0.21	17.4	3.2	7.75	0.87	37.7	2	11.37	0.5	155.3	7	26.3	1.3	10370	170	0.32	0.13	11.6	3.1	293	24	3.3	3.4	213	15
DA1	DA1_31	1686	19	0.038	0.017	17.1	1.1	0.078	0.021	1.22	0.19	2.19	0.51	0.35	0.17	12.3	1.7	4.04	0.27	54.4	2.6	19.24	0.82	90	2.8	21	1.2	222	5.9	30.2	1.1	9860	120	0.83	0.21	141.4	4.4	189.4	9	2.3	2.7	554	10
DA1	DA1_35	1798	11	0.166	0.034	19.13	0.53	0.283	0.04	3.13	0.31	5.61	0.77	1.04	0.18	20.1	1.7	6.97	0.37	82.8	3.8	27.5	1	121.3	4.8	28.34	0.98	294.7	9.4	37.3	1.2	10020	250	1.52	0.2	169	11	103.8	3.6	45	13	757	25
DA1	DA1_39	1714	26	0.166	0.023	17.82	0.79	0.474	0.053	6.53	0.42	13.2	1.6	1.29	0.31	54.9	3.7	19.23	0.86	243	12	80.2	4.3	359	16	80.6	3	768	26	103.2	3	12060	500	1.24	0.37	155	11	121.7	4.3	32.9	8.6	2230	61
DA1	DA1_40	1002	6.1	0.031	0.02	10.26	0.69	0.096	0.016	1.87	0.17	4.44	0.63	0.301	0.094	25	2.1	9.04	0.47	126.1	6.6	46	2.3	208	9.2	49.3	2.2	502	24	63	2.8	10360	170	1.62	0.23	186.3	9	311	17	7.5	3	1257	57
DA1	DA1_44	880	4.1	4.14	0.51	84	5.3	6.3	0.6	47	3.7	46.5	3.7	10.62	0.97	77.7	4.9	19.57	0.5	188.8	5.1	56.8	1.3	233.2	5.5	50.9	1.1	510	11	62.9	1.4	11810	220	6.71	0.48	247.3	4.8	620	12	15.9	3.9	1479	26
DBMK1	DBMK1_1	2999	22	0.125	0.039	14.3	4.9	0.315	0.064	3.35	0.56	5.2	2.3	1.52	0.49	16	6.5	5.7	2.1	76	29	28	10	127	41	29.4	8	346	67	50.4	6.7	9970	430	0.88	0.23	73	20	148	22	13.2	4	640	220
DBMK1	DBMK1_3	2964	32	2.1	1.3	26.2	3	1.6	0.48	12.4	2.1	13.6	1.6	3.91	0.54	24.3	3	7.01	0.52	77.1	3.7	27.2	1.5	123.1	7.8	30.8	1.7	327	16	41.8	1.7	9570	230	2.22	0.37	126.5	6.7	114.7	6.6	16.4	5.4	732	45
DBMK1	DBMK1_4	2554	22	0.092	0.031	33.7	1	0.348	0.087	4.5	1.1	6.4	2	2.44	0.69	18.3	4.9	4.25	0.84	44.7	8.2	12.4	1.9	49.1	7.1	11.8	1.4	118	13	14.9	1.4	9390	480	0.92	0.23	128.6	8.9	167	26	21.2	3.7	356	56
DBMK1	DBMK1_6	2548	27	0.06	0.022	41.5	1.9	0.279	0.047	4.08	0.36	7.1	1.1	2.08	0.33	29.6	2.9	7.41	0.6	81.7	6.3	28.4	1.8	122.1	7.9	30.9	1.9	329	14	42.1	1.6	9150	270	0.67	0.12	156.8	7.3	131.3	7.3	12	4	785	42
DBMK1	DBMK1_7	2975	18	0.089	0.023	26.06	0.59	0.33	0.044	3.99	0.49	5.9	0.96	1.55	0.39	17.3	1.3	5.9	0.4	75.9	2.3	28.55	0.86	134.8	4.3	34.82	0.85	356.6	9	48.6	1.4	10110	270	1.94	0.21	83.7	3.1	81.3	2.3	13.5	4.4	789	13
DBMK1	DBMK1_8	2523	56	0.294	0.035	49.9	2.8	0.972	0.089	11.7	1	15.1	1.9	6.94	0.98	35.8	4	10.62	0.61	106.7	5.2	33.9	1.4	141.7	6.6	34.1	1.8	330.8	8.8	47	1.2	6830	190	1.03	0.23	238	11	143.1	5.7	19	7.9	947	29
DBMK1	DBMK1_9	2986	33	0.113	0.044	18.9	1.2	0.334	0.072	4.73	0.77	4.2	1.7	2.05	0.52	22.5	2.6	7.61	0.55	89.1	3.8	33.7	1.9	156.4	7.3	39.4	2.2	380	18	51.9	2.8	9700	240	0.87	0.35	76.4	7	63.5	5	22	6.1	886	43
DBMK1	DBMK1_10	2606	23	0.104	0.021	43.1	4	1.7	0.13	18.8	1.6	15.2	2.1	7.35	0.66	34.2	4.1	8.03	0.65	76.3	6.9	23.1	2.1	100	11	23.3	2.3	257	32	35.7	4.4	8860	330	1.15	0.26	230	18	176	19	24.8	3.8	713	64
DBMK1	DBMK1_11	2967	23	0.16	0.03	28.3	1	0.964	0.085	14.13	0.94	21.3	1.6	3.94	0.4	67.3	3	19.87	0.65	219.5	5.9	72	1.7	301	10	66.5	2.3	617	18	80.4	1.8	8590	190	0.81	0.16	91.5	5.8	54.7	5.1	21.4	3.5	1897	34
DBMK1	DBMK1_12	2987	18	0.005	0.025	28	1.6	0.088	0.023	1.4	0.25	4.03	0.88	0.29	0.15	24.6	3.6	7.97	0.85	114	11	44.1	4.1	205	22	49	3.8	511	43	67.8	5.6	10630	220	1.54	0.19	88	11	106	17	3.9	3.4	1210	120
DBMK1	DBMK1_13	2995	26	0.235	0.034	55.3	4.4	0.408	0.061	5.31	0.79	9.1	2	3.04	0.75	29	5.3	10.3	1.4	125	13	46.6	3.8	211	21	52.3	4.3	542	39	71.3	4.3	9880	250	1.77	0.31	166	14	165	16	9	4	1290	130
DBMK1	DBMK1_14	2938	21	0	0.013	14.6	1.2	0.165	0.037	2.79	0.46	5.61	0.91	0.98	0.17	27.1	4	9.2	1.1	112	13	39.8	4.4	180	17	41.8	3.9	423	32	57.5	3.8	9020	230	0.9	0.15	50.4	4.3	58.9	4	8.9	2.5	1060	120
DBMK1	DBMK1_15	3325	26	0.022	0.021	24.96	0.8	0.043	0.016	1.22	0.31	3.92	0.57	2	0.35	22.6	1.9	8.53	0.45	114.3	3.3	43.7	1.4	208.6	5.8	49.7	1.4	520	13	72	2	9720	190	0.63	0.17	31.8	1.3	38.76	0.95	2.2	2.9	1170	23
DBMK1	DBMK1_16	2956	56	0.34	0.075	18.62	0.83	0.77	0.068	8.5	1.1	9.9	1.4	2.82	0.65	29.8	2.7	8.9	0.49	106.4	5.6	36.4	1.9	160.4	6.5	36.9	2	390	18	50.9	2.8	8060	250	1.28	0.24	97.7	5.7	68.9	4.4	36	12	993	29
DBMK1	DBMK1_17	3247	18	0.011	0.022	20.58	0.62	0.082	0.019	1.91	0.21	3.71	0.62	0.82	0.2	19.1	1.7	5.64	0.26	66.9	1.9	22.25	0.57	95.6	2.1	22.71	0.55	216.1	4.2	29.06	0.87	8730	100	0.57	0.16	108.7	2	76.9	1.7	11.3	2.8	626	12
DBMK1	DBMK1_18	2603	11	0.101	0.022	15.46	0.44	0.393	0.025	6.05	0.35	10.6	1.1	3.4	0.3	47	3.1	14.87	0.63	177.1	4.4	61.8	1.6	270.5	7.9	62.4	2	607	15	84.5	2.6	8530	110	0.87	0.15	126.7	4.6	129.9	2.9	7	3	1685	44
DBMK1	DBMK1_19	2576	28	0.271	0.085	23.7	2.1	0.605	0.096	6.3	1.4	3.6	1.1	2.01	0.56	10.9	2.4	3.25	0.45	38.2	5	14	1.4	68.1	5	19.4	1.8	244	11	42.7	2.1	9620	230	0.4	0.18	202	23	327	15	6.4	3.5	446	33
DBMK1	DBMK1_20	2632	29	0.75	0.13	26.4	4.3	1.75	0.24	20.1	2.3	19.6	2.2	9.9	1.2	46.6	6.4	11.1	1.6	92	14	25.4	4.1	101	15	24.9	3.5	272	35	37.9	3.6	10460	350	1.36	0.27	198	29	288	31	26.8	5.8	720	110
DBMK1	DBMK1_21	2658	28	0.13	0.033	16.2	2.3	1.05	0.11	14.3	1.6	21.1	3.1	6.6	1	59	11	15.7	2.9	160	29	50.6	8.6	214	38	46.4	8.6	446	77	58.2	9.5	6840	140	0.65	0.24	197	28	138	24	17.6	5.4	1370	250
DBMK1	DBMK1_22	2574	26	0.09	0.023	25.5	1	0.56	0.047	6.58	0.74	6.82	0.88	2.5	0.42	20.3	2	5.98	0.35	72.3	3	26	1.4	119.7	5	30.7	1.4	351	18	40.9	2	7830	250	0.66	0.19	136.4	7.7	187	20	9.5	2.7	744	23
DBMK1	DBMK1_23	2960	26	1.38	0.42	47	5.1	3.24	0.83	29.8	5.3	33.2	4.4	13.2	1.9	83.3	6.7	21.7	1.2	229.5	9.2	69.4	2.6	315	11	74.6	2.4	736	24	87.3	4.2	7520	140	1.08	0.17	392	42	356	28	30.4	4.5	1937	74
DBMK1	DBMK1_24	3324.1	34	0.102	0.028	20.76	0.95	0.194	0.047	2.3	0.56	4.46	0.9	1.15	0.22	19.9	2.7	6.29	0.47	78.5	6	28.9	1.7	147.3	7	35.7	1.8	389	20	53.8	2.2	8990	200	1.4	0.27	69.4	4.1	108.9	6.1	4.5	2.8	842	32
DBMK1	DBMK1_25	2546	24	0.082	0.019	16.3	2.8	0.684	0.098	8.8	1.3	7.9	1.6	1.91	0.29	21	4.6	4.73	0.96	52	11	14.5	2.9	58	11	15.3	2.7	167	28	19.2	2.7	7940	330	0.375	0.093	149	26	199	11	8.6	2.9	433	78
DBMK1	DBMK1_27	2860	27	0.496	0.069	21.8	1.6	0.86	0.11	10	1.2	12.1	1.8	4.67	0.72	36.1	4.4	10.71	0.89	116	11	38.8	2.9	165	14	39	2.9	411	23	54	3.6	9610	260	1.26	0.21	157	13	160	6.2	19.3	4.2	1043	79
DBMK1	DBMK1_28	3010	42	0.078	0.047	22.9	1.4	0.44	0.11	6.2	1.3	7.6	1.8	2.93	0.74	40.1	4.7	12.92	0.94	151.4	8.8	51.5	2.6	231	14	52.9	2.3	509	27	67.5	2.3	9000	190	0.81	0.26	82.3	5.2	89	11	13.1	3.8	1381	54
DBMK1	DBMK1_29	2923	22	0.043	0.037	14.9	3.2	0.083	0.035	1.38	0.43	3.7	1.3	0.5	0.19	17.7	5.1	6.6	1.8	91	22	33.4	7.5	156	33	36.9	7	383	62	52.1	6.9	9820	280	0.84	0.2	56	14	89.3	7.4	2.7	2.1	890	200
DBMK1	DBMK1_30	2997	30	0.347	0.034	16.2	1.3	1.37	0.11	18.2	1.3	19.7	1.8	6.65	0.63	57.5	3	15.8	1.1	155.6	8.3	49.7	3.2	202	13	44.3	2.7	412	25	55.1	3.4	7150	110	0.89	0.2	130.3	6.4	146.1	7.5	15.2	3.7	1329	70
DBMK1	DBMK1_32	2963	20	0.349	0.039	13.7	2.5	0.601	0.067	5.58	0.69	6.8	1.2	1.48	0.24	24.5	5.2	6.9	1.4	88	18	30.1	5.7	143	25	34.2	5.2	358	45	52.2	4.8	10630	310	0.71	0.17	60.1	9.6	139	16	9	2.2	830	150
DBMK1	DBMK1_33	2543	39	0.181	0.026	13.09	0.7	0.326	0.07	3.24	0.63	4.8	1.7	1.86	0.49	14.1	3.5	3.26	0.37	35.7	3.5	12.5	1	58.1	4.1	16.6	1.2	184.9	6.8	28.7	1.6	9420	190	0.69	0.17	87	8.2	143	10	8.3	4.1	369	22
DBMK1	DBMK1_34	2561	23	0.122	0.037	12.83	0.42	0.248	0.061	3.09	0.48	3.56	0.63	1.14	0.41	8.4	1.9	2.82	0.3	35	2	12.44	0.76	65.2	2.8	16.67	0.91	187.5	7.2	29.7	1.5	9420	250	0.94	0.29	74.6	2.5	131.4	4.5	6.5	4	370.9	9.8
DBMK1	DBMK1_36	2992	29	0.085	0.079	30.4	1.5	0.114	0.029	1.99	0.44	5.3	1.5	0.69	0.37	19.9	2.6	6.62	0.55	84.5	4.8	32.9	1.5	153	6.4	36.7	1.6	373	15	49.6	2.2	9030	140	1.51	0.33	83.8	2.7	106.6	5.1	6.1	5.2	876	21
DBMK1	DBMK1_37	3335	25	0.016	0.02	14.07	0.61	0.073	0.016	1.44	0.23	3.4	0.65	1.04	0.24	16.7	2.4	6.22	0.56	82.3	5.8	31	2.1	147.3	8.6	36	2	372	16	50	1.7	8470	220	0.67	0.13	47.1	3.5	67.2	3.7	6.5	2.9	841	50
DBMK1	DBMK1_38	1036	7.8	0.085	0.019	18	1.1	0.13	0.017	1.63	0.18	4.18	0.56	0.34	0.11	15.6	2	5.14	0.29	63.8	3.6	22	1.2	96.3	5.3	22.8	1.1	227.6	9.4	29.7	1.5	10040	180	0.86	0.18	69.9	3.8	150.1	9.9	7	2.4	607	30
DBMK1	DBMK1_39	2970	29	0.24	0.13	34.2	2.1	0.57	0.19	6.3	1.4	8.5	1.7	1.58	0.4	29.6	5.6	11.5	1.1	150.7	6.9	55.7	3.3	257	14	62.8	4.2	630	48	81.1	5	9670	320	1.49	0.34	162	12	179	17	11.8	3.3	1530	110
DBMK1	DBMK1_40	3255	25	0.076	0.02	26.61	0.73	0.258	0.026	2.99	0.26	6.01	0.85	1.75	0.28	20.1	2.1	6.37	0.3	75.6	3.3	24.98	0.99	117.8	4.7	28	1.1	269	11	36.2	1.4	9060	220	1.17	0.16	103.6	4.1	131.4	5.7	39.4	9.3	709	16
DBMK1	DBMK1_41	2563	36	4	1.4	35	2.1	1.54	0.36	11.2	1.5	10.3	1.6	3.29	0.53	33.9	1.7	10.25	0.33	123.6	6.9	43	2.9	203	16	49.8	3	540	41	69.4	4.8	6710	160	1.08	0.25	173.9	7.5	135	5.8	48	12	1260	85
DBMK1	DBMK1_42	2984.5	18	0.052	0.014	31	1	0.13	0.023	1.4	0.25	2.02	0.44	0.98	0.25	10.6	1.4	3.73	0.35	49.4	3.9	17.5	1	91.4	5.5	24.3	1.2	265	13	36.8	1.6	10090	210	1.81	0.22	65.5	2.8	103	6.2	23.1	8.7	532	30
DBMK1	DBMK1_43	2533	16	0.043	0.012	17.49	0.55	0.219	0.028	3.92	0.3	7.2	1	2.02	0.24	30	2.5	8.43	0.55	92.7	4.1	30.1	1.2	127.3	4.7	28.62	0.98	274	11	36.5	1.4	8300	140	0.59	0.12	33.3	1.9	39.8	2	36.8	5	800	26
DBMK1	DBMK1_44	2541	18	0.013	0.03	8.8	1.1	0.06	0.018	0.48	0.16	0.75	0.31	0.67	0.14	2.1	1.2	0.74	0.14	9.9	1.3	3.5	0.36	17	1.2	4.42	0.35	52.6	3.2	8.95	0.61	10510	300	0.194	0.099	43.1	2.5	144	10	3.6	2.4	117.4	8.4
DBMK1	DBMK1_45	2946	18	0.296	0.091	24.8	1.2	0.328	0.037	3.82	0.34	7.22	0.88	1.96	0.33	30.1	2.7	9.5	0.78	123.9	7.3	44.8	2.7	206	11	49.4	2.3	497	19	62.8	2.2	9060	270	1.18	0.19	77.8	4.4	97	17	9.7	2.2	1225	61
DBMK1	DBMK1_46	2979.4	26	0.36	0.28	22.1	1.4	0.62	0.12	9.2	1.5	16.1	1.6	2	0.38	60.5	5.1	19.7	1.6	235	16	80.4	5.2	350	22	76.9	4.2	728	36	91.4	5.4	8570	270	1.43	0.21	97.6	4.5	83.8	4.5	5.2	1.8	2130	140
DBMK1	DBMK1_50	2982.1	29	0.189	0.035	12.08	0.34	0.295	0.059	3.08	0.56	4.1	1.1	1.26	0.34	14.9	1.6	4.92	0.36	59.7	4.6	21.9	1.6	101.1	5.9	25.1	1.1	278	11	38.5	1.5	10640	480	1.46	0.31	114	14	99	16	18	4	615	34
DBMK1	DBMK1_52	2994	30	0.661	0.086	29.4	1	1.7	0.19	19.2	2.2	24.3	3.3	8.8	1.3	57.4	6	15.5	1.5	164	11	52.1	2.3	223.5	9.3	52.2	2.3	519	22	68	2.9	8520	150	2.14	0.37	164	10	191	16	21	4.2	1432	74
DBMK1	DBMK1_53	2644	41	3.54	0.6	59	4.1	7.04	0.73	69.1	6	71.9	7.8	31.2	2.7	155	13	34.9	2.7	279	18	67.3	4.3	260	11	60.1	2.8	613	24	85.6	3.1	9460	200	1.25	0.18	558	31	709	43	47.5	7.2	2000	100
DBMK1	DBMK1_54	2869	49	0.706	0.086	24.9	1.4	2.13	0.25	24.7	2.3	23.6	3.3	10.7	1.2	68.2	7	16.8	1.7	172	17	52.6	5.2	218	21	48.2	3.9	476	35	66	4.3	8110	390	1.64	0.27	172	10	204	15	23.8	3.7	1440	130
DBMK1	DBMK1_55	2557	31	0.276	0.068	33.59	0.86	0.66	0.1	8.7	1	11.9	1.7	5.53	0.88	29.4	2.2	7.41	0.61	71.5	5.1	22	1.2	100	5.3	26.4	1.3	301	12	44.4	1.7	9010	230	0.84	0.15	180.8	6.9	216.6	9.9	23.1	5.8	678	38
DBMK1	DBMK1_56	2854	37	0.88	0.29	16.2	1.8	0.92	0.14	9.7	1.7	11.3	2.8	3.5	0.75	31.8	3.2	8.77	0.86	99.5	8.3	32.5	2.6	149.7	9.5	35.1	1.8	376	16	53.3	1.8	9550	200	1.01	0.17	92	8.8	143.9	5.7	19.9	5.9	922	57
DBMK1	DBMK1_57	2575	25	0.107	0.053	25.31	0.73	0.271	0.038	3.61	0.5	5.11	0.68	1.44	0.22	15.1	1.6	4.56	0.32	48.8	2.5	17.11	0.62	80.2	3.5	22.23	0.79	251.6	5.4	35.6	1.2	8520	200	0.41	0.11	150.5	5.5	163	7.6	10	2.3	513	11
DBMK1	DBMK1_58	2542	26	10.4	4.9	79.6	9.2	3.4	1.4	20.8	6.2	13.4	1.5	2.71	0.24	42.4	3.3	11.58	0.61	123.5	5.9	38.8	1.4	162.2	6	36	1.4	357	10	45.6	1.2	8470	150	1.25	0.15	43.4	1.4	38.1	1.9	26.4	2.7	1089	42
DBMK1	DBMK1_59	2978.1	19	5	2	34.5	5.6	2.55	0.93	17.2	4.8	10.57	0.96	2.11	0.23	38.8	2.2	11.89	0.57	142.5	7.1	47	2.3	211.9	9	47.8	2.1	468	15	59.9	2	8135	85	0.94	0.14	59.4	2	54.5	1.8	6.6	2.4	1300	56
DBMK1	DBMK1_60	2559	24	0.131	0.051	41.7	3.6	0.76	0.22	8.8	2	11	1.9	4.33	0.85	36.5	5.2	9.2	1.2	103	12	31.5	3.6	132	14	31.2	3	316	31	45.3	3.9	8600	180	0.47	0.13	208	22	235	11	15.1	6.5	880	110
DBMK1	DBMK1_61	2525	49	0.91	0.47	24.4	1.5	1.48	0.17	14.8	2.2	12.8	2.6	6	1.4	26.9	5.1	6.3	1	50.8	6.6	13	1.6	46.7	4.6	9.91	0.99	90.1	6.5	11.23	0.8	7630	140	0.86	0.12	197	17	169	14	37.7	6.4	364	35
DBMK1	DBMK4_1	3352	32	0.004	0.012	7.5	0.27	0.072	0.017	1.15	0.21	2.11	0.47	1.12	0.19	8.5	1.6	2.81	0.39	36.2	4.8	13.5	1.6	66	7.7	16.8	1.7	196	17	27.5	2.5	7560	150	0.196	0.067	13.3	1.6	20.2	1.9	5.9	2.4	376	42
DBMK1	DBMK4_2	2633	35	0.303	0.026	8.12	0.64	1.34	0.11	13.46	0.9	15.2	1.6	6.82	0.53	37	3.9	12.7	1.7	160	23	56.9	9.8	278	46	82	13	940	120	137	17	11150	200	3.1	0.67	73.8	3.7	133.7	9	7.6	2.7	1540	270
DBMK1	DBMK4_3	2556	19	0.306	0.042	30.8	1.6	1.22	0.15	13.1	1.1	17.3	2.4	5.99	0.49	36.9	3.4	10.55	0.62	111.6	4.8	33.9	1.6	139.8	7.9	33.5	1.4	342	14	43.3	2.1	9110	210	0.85	0.14	141.2	6.7	161.9	7.5	10.1	2.8	894	33
DBMK1	DBMK4_4	2606	16	0.127	0.025	18.6	1.1	0.207	0.034	3.6	0.33	8.28	0.9	1.18	0.19	45	2.8	14.2	1	196	11	66.1	4.1	295	16	68	3.7	650	34	77.9	3.6	9360	180	1.79	0.24	91	5.1	105.1	8.1	8.6	3	1820	95
DBMK1	DBMK4_6	2895	23	0.015	0.018	16.98	0.83	0.101	0.027	2.26	0.36	3.84	0.7	0.86	0.21	19	2.6	7.12	0.91	99.1	9.4	36.2	3.6	161	17	38.7	3.5	392	26	49.6	3.7	9140	200	0.94	0.2	60.6	5	58.5	1.9	3.3	3.1	944	93
DBMK1	DBMK4_7	2594	23	0.009	0.017	2.64	0.18	0.127	0.021	1.88	0.2	2.42	0.55	1.29	0.21	11.2	1.4	3.86	0.37	53.3	5.1	18.7	1.5	94.7	8.2	25.6	2.1	298	18	39.9	2.8	6320	170	0.22	0.071	29	1.5	63.5	4.6	7.4	2.8	573	49
DBMK1	DBMK4_8	3195	34	0.0216	0.0096	13.7	1.8	0.206	0.027	3.26	0.42	7.1	1.4	2.52	0.38	33.5	5	10	1.3	131	18	43.3	5.9	189	26	44.9	5.6	471	49	58.2	7.2	6590	170	0.46	0.13	35.2	5	57.2	2.7	6	2.6	1120	160
DBMK1	DBMK4_9	2579	28	0.027	0.033	25.2	2.1	0.338	0.093	5.6	1.2	9.2	2.1	2.52	0.65	40.3	3.6	11.5	1.1	129.3	7.5	46.7	4	192	13	44.4	2.7	452	26	53.4	2.6	8720	380	0.74	0.45	154	12	190	14	9.8	6	1155	72
DBMK1	DBMK4_10	3484.1	30	0.344	0.052	23	1.3	1.52	0.12	15.6	1	23	1.5	7.34	0.56	68.7	5.7	19.74	0.89	234	16	78.6	5.5	331	26	76.7	6.5	755	61	96.4	8	7950	200	1.57	0.37	167	17	174	13	15.5	4.2	2170	160
DBMK1	DBMK4_11	3026	25	0	0.019	0.9	0.1	0.025	0.021	0.43	0.17	0.38	0.23	0.24	0.15	2.16	0.97	0.96	0.15	14.1	1.1	6.74	0.35	39.8	1.9	11.9	0.62	167.9	6.1	29.18	0.86	8710	170	0.073	0.064	15.4	2.1	45.7	2.4	3.5	2.2	218	8.3
DBMK1	DBMK4_12	2614	24	0.016	0.016	18.49	0.37	0.255	0.02	5.35	0.34	10.9	1.3	1.42	0.2	59.5	3.6	19.46	0.75	236	6.7	80.4	2.1	348	11	77.6	2.3	730	16	91.7	2	9220	130	1.25	0.2	80.3	2.5	82.9	2.3	12.7	2.8	2138	48
DBMK1	DBMK4_13	2545	50	0.273	0.04	30.2	2	1.06	0.13	11.3	1.3	13.7	2.6	6.12	0.67	34.1	4.8	8.12	0.63	82.9	6.1	24.6	1.5	108	7.6	28.3	1.7	331	22	41.4	2.6	7930	300	0.53	0.14	172	13	207.4	9.9	9.3	3.7	709	36
DBMK1	DBMK4_14	2547	19	0.032	0.02	28.16	0.89	0.399	0.044	6.2	0.53	10.3	1.2	2.22	0.35	39.5	2.4	11.87	0.58	138.5	4.9	46.9	2.2	215	11	50.3	2.5	492	15	65.1	2.5	8460	170	0.85	0.23	173	7.3	138.7	4.3	15.1	3.1	1325	43
DBMK1	DBMK4_15	2541	25	0.35	0.1	35.5	2.3	1.37	0.22	16.4	2.7	23.7	5.4	7.5	1.4	43.9	8.3	12.2	1.6	128	15	36.5	3.5	165	18	39.6	3.8	427	43	56.9	4.4	9820	310	1.11	0.17	211	19	192	18	5.8	4	1060	100
DBMK1	DBMK4_16	2992	21	0.024	0.017	23.11	0.76	0.114	0.017	2.13	0.18	4.11	0.79	0.45	0.12	20.8	1.8	7.16	0.33	88.1	3.1	31.5	1	141.6	3.6	34.9	1	355	11	42	1	7800	170	1.54	0.28	78.9	2	111	2.7	11.1	1.8	844	15
DBMK1	DBMK4_17	2599	17	0.148	0.021	17.21	0.9	0.361	0.036	6.44	0.5	13.6	1.8	0.92	0.22	59.9	2	19.05	0.68	225.5	7.9	78.2	3	330.8	8.7	76.9	3	701	22	83.3	2.6	8790	160	1.57	0.26	109.8	5.8	112.7	4.8	11.2	3.2	2044	35
DBMK1	DBMK4_18	2606	20	0.001	0.017	13.45	0.5	0.049	0.015	0.88	0.16	3.15	0.53	0.54	0.21	15.4	2	5	0.3	60.8	3.1	20.34	0.95	86.4	4.8	20.1	1.4	198	11	26.1	1.3	10470	180	0.81	0.17	71.1	2.6	81.8	2.6	5.3	2.4	565	25
DBMK1	DBMK4_19	2612	28	0.85	0.24	40.2	3.8	1.86	0.46	24.6	6.6	33.4	8.9	12.4	3.3	59	14	16.2	3.8	136	28	29.2	5.6	117	20	24.4	3.7	221	32	27.5	3.6	8720	400	0.38	0.18	170	23	159	19	18.4	7.8	810	130
DBMK1	DBMK4_20	2971	29	0.023	0.017	14.6	1.5	0.217	0.06	3.86	0.96	6.4	1.6	1.48	0.34	32.8	6.4	11.4	1.9	154	21	50.1	6.2	229	25	55.1	4.9	539	37	70.3	4.8	8930	310	2.02	0.38	68.1	8.3	81	7.8	5.1	3.2	1390	170
DBMK1	DBMK4_21	2550.6	20	0.34	0.068	31.5	1.2	0.341	0.048	3.9	0.32	5.57	0.83	2.41	0.33	19.1	1.5	5.97	0.33	70	4	25	1.3	125.1	5.6	32.8	1.7	383	16	54.2	2.2	8660	120	1.02	0.19	189.9	7.9	208.3	6.6	5.7	2.1	748	25
DBMK1	DBMK4_22	2544	26	0.133	0.026	9.06	0.66	0.509	0.072	5.52	0.64	6.8	1	2.8	0.42	21.7	2	6.99	0.58	81.7	5.7	27.9	1.8	124.7	8.6	30.5	1.8	328	18	39.8	2.1	7390	220	0.71	0.14	75.1	6.9	187.7	9.6	4.3	2.2	715	38
DBMK1	DBMK4_23	3166	24	0.026	0.015	14.98	0.66	0.109	0.018	1.78	0.17	3.59	0.65	1.27	0.16	17.6	1.7	6.72	0.61	93.6	8.6	35.4	3.5	174	16	42.4	3.6	462	37	63.2	5.3	8170	120	1.43	0.15	81.2	7.1	145.6	4.5	5	2.6	939	93
DBMK1	DBMK4_24	2993	25	0.322	0.041	25.4	1.1	1.57	0.12	15.2	1.2	18	2.4	7.48	0.81	36.9	3.1	9.8	0.77	104.4	6.1	31.6	1.9	138.6	8.7	31.8	1.2	342	14	44.4	1.5	10080	240	1.5	0.25	126.3	7.2	174	8	12.3	4.7	835	42
DBMK1	DBMK4_25	2968	23	0.147	0.031	23.36	0.94	0.804	0.082	8.36	0.74	10.4	1.5	3.38	0.49	27.7	2.3	7.76	0.57	89.4	5.2	29.2	1.9	131.4	8.1	31.6	1.9	329	15	43.1	2.5	8730	200	1.1	0.26	108.7	6.1	111.7	4.1	2.1	2.6	803	43
DBMK1	DBMK4_26	3121	22	0.047	0.017	18.56	0.86	0.176	0.021	2.22	0.24	3.66	0.62	1.37	0.18	18	1.8	6.25	0.47	83.3	5.5	31.4	2	150.5	9.8	35.7	2.2	379	19	50.6	2.9	8780	150	0.73	0.15	32.4	1.1	56.7	3.6	4.7	2.3	833	53
DBMK1	DBMK4_27	2586	16	0.032	0.015	17.81	0.82	0.573	0.039	8.65	0.48	13.8	1.8	0.75	0.23	58.3	3.1	16.47	0.78	183.3	3.9	60.5	2.2	251.1	7.2	54.7	2	486	13	63.4	1.4	8810	170	1.11	0.25	152.5	6.6	138.9	5.8	14.1	5.1	1694	35
DBMK1	DBMK4_28	3019	44	0.018	0.026	6.67	0.63	0.191	0.048	2.88	0.5	3.8	1.1	1.14	0.36	18.5	2.4	5.58	0.56	67.8	4.3	22.7	2.4	94.9	6.5	21.1	1.5	215	12	28.6	1.6	7170	190	0.4	0.15	21.5	1.6	33.3	1.4	17.3	6.7	584	35
DBMK1	DBMK4_29	3318	26	0.203	0.043	17.07	0.64	1.063	0.083	11.81	0.59	17.9	2.3	5.32	0.47	30.7	3.4	9.13	0.68	97.5	5.1	30.8	1.4	140.5	6.7	35.1	1.8	372	21	52.3	3	9330	270	0.53	0.25	111.1	3.4	125.8	3.7	10.4	4.2	826	36
DBMK1	DBMK4_30	2552	22	0.263	0.022	30.2	1.4	0.97	0.12	13.3	1.4	15.1	3	5.4	0.49	43	4.6	9.84	0.59	103.8	4.9	30.1	1.9	130.9	8.1	28.6	1.8	270	17	37.3	2.2	8800	160	0.62	0.29	203	14	154.9	9.2	14.9	4.9	845	45
DBMK1	DBMK4_31	2630	17	0.033	0.016	8.54	0.31	0.399	0.043	6.94	0.48	12.5	1.5	2.54	0.27	51.2	4.2	15.23	0.71	177.7	9.7	60.5	3	250	13	52.4	2.7	506	28	65.4	2.5	7910	130	0.65	0.15	99.7	6.7	115.8	5.5	11.3	3.1	1570	67
DBMK1	DBMK4_32	2970	20	0.005	0.018	17.5	0.6	0.108	0.02	2.31	0.19	5.03	0.62	0.6	0.19	23.4	2.5	8.2	0.48	105.2	4	36.9	1.6	167.5	5.2	39.9	1.4	396	12	51.9	1.3	9280	200	1.04	0.25	64	2.3	64.7	2.5	3.9	2.5	1019	19
DBMK1	DBMK4_33	3257	37	0.303	0.062	14.39	0.6	1.3	0.14	14.07	0.6	15.1	2.1	6.35	0.67	37.6	2.1	8.56	0.54	79.4	3.9	23.8	0.93	97.8	3.4	21.8	1.2	211	9.7	26.19	0.91	8210	200	0.27	0.14	83.8	3.6	79.9	4.6	10.7	4.8	622	19
DBMK1	DBMK4_34	3303	50	0.033	0.014	17.8	1.1	0.125	0.02	2	0.21	3.02	0.58	1.15	0.28	12.7	1.9	4.55	0.5	58.4	6.1	19.6	1.7	96.5	9.8	25.5	2.3	290	21	33.9	3.5	7800	340	0.431	0.096	128	10	83	12	5	2.7	560	53
DBMK1	DBMK4_36	2640.7	15	0.011	0.012	16	0.47	0.276	0.023	5.33	0.3	10.4	0.93	2.59	0.23	52	2.8	17.15	0.72	218.4	6.7	75.6	2.2	328.7	9.7	75.7	2	727	18	89.6	2.5	8290	150	0.85	0.13	115.4	3	128.1	3	6.5	1.8	2024	62
DBMK1	DBMK4_37	1047	13	0.013	0.026	1.08	0.15	0.011	0.012	0.27	0.17	0.09	0.17	0.22	0.11	4.2	1.3	1.88	0.22	26.2	3.6	10.2	1.4	55	11	15.5	2.6	190	32	27.5	5	11210	300	1.02	0.29	6.58	0.58	425	22	6	2.7	322	42
DBMK1	DBMK4_39	2587	34	0.036	0.023	9.6	1.4	0.142	0.031	1.44	0.23	2.31	0.36	0.78	0.16	9	1.2	2.89	0.24	36.5	2.4	14.22	0.82	74.6	2.8	21	1.2	251	12	30.9	1.2	7660	300	1.68	0.32	29.7	2.7	125	26	3.9	2	415	15
DBMK1	DBMK4_40	2988.3	15	0.026	0.016	21.2	1.7	0.468	0.048	8.84	0.98	15.7	1.6	1.93	0.29	61.3	4.6	19.4	1.5	236	16	80.6	4.4	348	20	78.3	4.7	734	42	98.5	4.4	8870	170	1.09	0.16	129	13	84.3	8.2	8.5	2.3	2160	120
KRSV	KRSV_1	1621	12	0.205	0.029	11.2	0.56	0.448	0.049	4.08	0.39	7.2	1.1	1.12	0.22	23.6	1.8	7.81	0.34	97.2	4.1	33.6	1.4	150.6	6.6	37.2	1.4	389	13	46.9	1.5	7440	160	0.63	0.11	58.4	3.4	100.5	3.9	29	11	898	29
KRSV	KRSV_2	2514	17	0.075	0.056	18.5	0.73	0.141	0.046	1.5	0.3	2.66	0.5	0.58	0.15	13.6	1.5	5.1	0.23	67.7	3	24.92	0.83	113.1	3.7	27.28	0.86	273.1	6.6	35.59	0.93	10420	160	1.42	0.22	94.1	2.6	150.5	3.7	5.1	2.9	703	13
KRSV	KRSV_3	1644	11	1.1	1.3	61.8	3.3	0.58	0.27	6.7	1.8	12.4	1.9	4.22	0.53	55.6	5.2	18.2	1.2	222	12	75	3.8	317	14	70.3	2.7	696	24	91.9	3.6	9300	210	1.04	0.15	189.1	8.7	110.1	4.1	5.6	2.5	1952	78
KRSV	KRSV_4	1858	42	1.81	0.48	14.3	2.1	1.85	0.41	13.7	2.1	13.5	3.5	2.97	0.93	23.6	4	7.7	1.2	84.3	9.8	24.1	2.3	97.4	8.8	23.5	2.1	262	20	27.6	2.4	8720	440	1.64	0.34	91	16	241	46	15.1	4.8	635	40
KRSV	KRSV_5	1852	15	0.033	0.019	6.84	0.34	0.184	0.026	2.97	0.41	5.02	0.55	0.26	0.14	19.1	2.6	6.45	0.58	72.9	4	23.2	1.3	101.9	7.8	22	1.4	221.3	7.7	27.1	1.8	8660	160	1.33	0.21	53.5	1.7	107.6	7.1	18	4	620	38
KRSV	KRSV_6	2917	38	10	1.7	64	13	14.4	2.3	96	18	83	18	24.3	6.2	178	40	43.9	6.2	441	49	130	15	519	49	110.4	7.2	1039	48	132.1	6.2	10290	470	2.31	0.29	305	32	372	21	15.7	5.1	3510	280
KRSV	KRSV_7	1603	10	0.203	0.085	12.5	1.1	0.41	0.14	4.9	1.3	13.9	9.4	5.1	4.5	72	47	13.9	6	160	49	45.2	5.9	197	15	45.7	2.5	462	20	61.6	2	9030	120	1.44	0.16	102.2	7.9	157	7.8	9.9	3.3	1350	230
KRSV	KRSV_10	1606	24	1.6	0.19	24	2.9	2.7	0.29	23	2.8	26.4	3.2	5.54	0.61	66.2	4.9	23.4	1.9	296	35	108	17	532	90	135	24	1440	280	195	35	10810	490	1.98	0.51	112	13	228	32	16	4.5	3110	480
KRSV	KRSV_11	1294	9.3	0.014	0.016	7.98	0.39	0.092	0.02	1.67	0.2	3.43	0.48	0.43	0.12	15.6	1.5	5.32	0.34	69.7	3.3	23.9	1.1	104.6	4	24.1	0.92	238.3	9.7	29.4	0.84	9100	140	0.54	0.11	124.1	4.5	86.3	3.1	30.8	3.1	660	21
KRSV	KRSV_12	1385	10	1.233	0.067	25.1	1	2.152	0.085	22.7	1.4	31.8	3.2	4.08	0.39	89.1	5.1	25.5	1.1	278.3	9.1	78.4	2.6	308.5	7.9	63.9	3.2	577	17	62.93	0.88	5820	120	3.38	0.42	177.7	7.9	245.5	9.8	15.7	3.4	1927	33
KRSV	KRSV_13	1901	14	3.7	0.58	27.3	4.1	6.2	1	44	7	45.2	6	13.5	2.1	98	8.7	27.6	1.9	285	21	77.5	5.4	292	19	62.3	4.6	575	35	69.9	4.7	10940	210	0.52	0.15	271	15	378	15	14.7	6.2	2070	120
KRSV	KRSV_14	1562	9.5	0.109	0.038	12.9	1	0.189	0.051	2.17	0.44	3.2	1.1	1.02	0.22	15.1	2.7	5.42	0.69	69	6.9	26.5	2.6	131	13	35.6	3.3	394	35	58.4	5	8890	140	0.55	0.13	122	15	151	15	2.9	3.3	770	64
KRSV	KRSV_15	1780	29	2.34	0.65	20.3	4.4	2.89	0.7	21.8	4.7	23.2	5.2	8.1	2.9	45	10	15.5	2.3	172	19	53.8	3.9	255	24	70.8	7.4	852	91	113	14	11190	350	1.67	0.43	72	13	433	23	15.5	6.5	1510	100
KRSV	KRSV_16	1418	20	0.007	0.021	0.97	0.21	0.026	0.016	1.4	0.3	6.2	1.6	0.06	0.14	33.6	2.4	14	0.87	164.4	8.9	47.6	3.1	169	11	32.8	2.4	264	23	28	2.9	11120	420	0.57	0.25	42.9	2.4	134.6	6	14	4.7	1357	76
KRSV	KRSV_17	1700	15	1.26	0.37	20.3	1.9	1.64	0.41	12.4	3.2	13.3	2.7	3.46	0.92	50.6	5.3	18.6	1.6	245	17	89.4	6.3	420	31	98.8	5.4	1028	61	136.6	8.4	11130	230	1.69	0.3	116.5	9.7	194	19	21.3	3.9	2390	160
KRSV	KRSV_18	1363	9.1	0.03	0.015	2.21	0.21	0.172	0.03	3.1	0.47	7.37	0.91	0.69	0.17	47.3	3.9	20.39	0.81	308	11	117.3	4.6	528	21	122.1	4	1201	34	150	4.8	9870	290	1.52	0.18	111	12	178.3	6.3	14.8	3.5	3076	88
KRSV	KRSV_19	1676	10	0.183	0.042	24.4	1	0.541	0.049	6.77	0.5	10.2	1.2	2.59	0.33	41.9	3.3	14.39	0.65	174.1	6.7	61.2	2.3	262	10	60.3	2.2	620	24	80	3.5	8170	150	1.61	0.22	217.7	9.7	238	12	3.1	3	1610	56
KRSV	KRSV_20	1619	12	0.125	0.019	11.69	0.46	0.214	0.021	2.16	0.26	3.24	0.47	0.62	0.11	13.2	1.4	4.72	0.31	65.4	3	23	1.1	111.1	4.7	27.2	1.1	288	11	39	1.1	10290	190	1.05	0.16	63.5	3	60.9	1.9	10.6	2.7	655	26
KRSV	KRSV_21	1600	8.3	0.094	0.02	13.91	0.91	0.262	0.04	4.26	0.64	10.4	1.6	2.41	0.56	47.8	6.3	17.3	1.9	217	22	72.5	6.8	327	28	74.5	6.1	740	56	100.1	8	9860	120	1.6	0.16	117	14	126	10	24.8	3.2	2010	200
KRSV	KRSV_22	1181	9.3	0.453	0.067	7.11	0.42	0.91	0.095	7.93	0.66	12.6	1.6	1.67	0.35	44.5	3.6	14.04	0.98	177	11	55.7	3.2	233	14	50.8	2.9	473	29	59.1	3.2	9750	150	1.29	0.22	202	11	283	15	19.2	4.8	1473	86
KRSV	KRSV_23	1376	11	1.56	0.49	15.6	4.3	2.66	0.88	18.1	4.2	20	3.7	4.5	1.4	58.8	5.9	21.4	2	248	34	72	15	322	80	71	19	690	180	82	23	10730	370	0.57	0.14	80	13	279	27	14.6	4.3	1980	400
KRSV	KRSV_24	1370	8.7	0.022	0.017	1.65	0.23	0.127	0.028	2.58	0.4	7.4	1	0.38	0.14	46.1	3.1	20.6	1.2	294	20	103.5	9.1	453	48	100	11	950	110	117	15	10740	260	1.05	0.16	81.1	9.8	191	10	14.6	3.4	2810	230
KRSV	KRSV_25	1612	13	6.86	0.56	88.8	7.6	9.82	0.71	68.8	6.3	59.6	5.3	22.1	1.9	102.1	8.9	28.6	2	295	21	88.9	8.1	415	35	108.2	9.5	1179	91	170.5	9.6	11670	210	1.05	0.21	596	41	576	26	19.6	4.3	2630	220
KRSV	KRSV_26	1703	13	0.021	0.016	8.04	0.41	0.088	0.022	1.6	0.39	3.35	0.77	0.56	0.19	17.5	1.7	6.42	0.47	89	6.1	30.7	1.7	149.6	9.1	37	2.2	397	23	50.8	2.4	8310	120	0.67	0.17	62.8	5.6	102.2	7.5	9	3.3	833	46
KRSV	KRSV_27	1593	27	0.311	0.091	5.61	0.86	0.49	0.15	4.3	1.1	4.4	1.2	1.02	0.43	19.6	3.1	8.87	0.84	131.5	6.1	50.1	2.3	245	18	57.7	4.3	566	41	65.3	5.3	11090	550	2.42	0.26	26.9	2.5	259	15	7.8	3.3	1457	82
KRSV	KRSV_28	1221	7.1	0.08	0.026	3.59	0.2	0.205	0.039	2.64	0.25	5.35	0.77	0.43	0.17	26.1	2.3	9.48	0.81	122	11	40.4	3.5	181	15	40.3	2.8	403	27	50	3.3	9830	170	1.08	0.15	126	12	252	16	20.5	2.8	1134	97
KRSV	KRSV_29	1801	16	4.22	0.79	30.7	3.5	6.67	0.63	49.4	4.4	44	4.2	12.4	1.2	77.3	6.9	21.3	1.3	191.7	9.5	50.7	3.3	189	12	40.5	2.3	378	12	47	2.3	9530	320	1.21	0.33	363	18	272	18	35.7	6.2	1288	48
KRSV	KRSV_30	1717	9.4	0.151	0.04	8.13	0.32	0.23	0.041	2.38	0.28	4.07	0.65	0.5	0.12	13.9	1.5	5.31	0.3	67.2	3.7	23.7	1.4	107.8	6.9	25.5	1.9	258	17	33.4	2	9450	150	1.16	0.15	96.5	8	186	13	12.7	2.9	657	36
KRSV	KRSV_31	1635	11	0.788	0.057	13.26	0.61	1.103	0.075	9.95	0.57	11.7	1	2.61	0.26	33	1.7	10.65	0.55	122.4	5.7	37.6	1.4	159.7	5.9	34.9	1.8	343	14	44.1	1.9	8980	260	1.18	0.13	99	6.8	155	12	7.1	2.9	1007	42
KRSV	KRSV_32	1433	9.6	4.37	0.48	40.3	2.8	5.8	0.39	44.6	3.9	41.4	4	10.5	1.3	66.6	4.9	17	1.6	158	12	40	3.2	161	18	35.7	2.7	341	29	45.1	3.9	9940	250	1.68	0.26	212	18	269	15	9.6	5.5	1074	71
KRSV	KRSV_33	1618	13	0.034	0.02	17.32	0.78	0.123	0.027	1.36	0.17	3.1	0.63	0.66	0.19	12.9	1.8	4.84	0.36	64.6	3.7	22.97	0.87	114.2	4.6	27.9	1.3	298	11	40.8	1.4	9310	210	0.97	0.21	98.5	2.7	140.5	5.2	9.6	4.6	681	15
KRSV	KRSV_34	2582	17	0.012	0.016	8.38	0.42	0.058	0.02	0.87	0.2	2.65	0.67	0.91	0.21	13	2	4.89	0.41	63.5	3.6	21.9	1.1	101.8	4.6	23.1	1	243.1	9.1	33	1.1	8100	120	0.51	0.14	46.3	2.2	81.6	3.6	11.7	2.8	598	22
KRSV	KRSV_35	1888	19	5.7	0.81	52.6	8	8.4	1.1	59.1	7.6	58.1	7.9	15.7	2.8	117	10	35.4	2.7	375	17	107.8	3.9	459	16	99.7	4.4	997	35	121.1	4.7	10650	240	0.97	0.23	186	9.4	309	15	25.7	5.2	2929	97
KRSV	KRSV_36	1409	12	2.15	0.5	10.4	2.2	2.76	0.55	22.8	4.6	25.8	5	4.4	0.96	76	12	26.1	3.8	315	48	93	16	373	63	74	12	740	110	82	12	10220	210	0.53	0.15	123	25	284	20	10.4	3.3	2530	400
KRSV	KRSV_37	1756	13	0.193	0.061	9.1	0.89	0.69	0.12	8.78	0.97	14.7	1.4	1.08	0.29	54.4	3.8	17.05	0.75	203.2	9.4	69.4	2.5	293	11	63.7	2	602	18	80.4	2	8610	140	1.18	0.22	156.3	7.2	236	10	8.8	3.9	1779	44
KRSV	KRSV_38	1871	15	0.271	0.077	24.3	1	0.364	0.077	3.64	0.56	6.1	1	0.99	0.33	25.5	2.6	9.97	0.52	125.1	4.9	43.3	1.7	201.3	8	47.5	1.8	449	12	57.5	1.4	9660	200	1.51	0.31	190.7	7.3	289	8.3	11.4	4.5	1215	33
KRSV	KRSV_39	1363	12	1.26	0.12	30.8	1.9	2.43	0.24	20.2	1.5	24.9	2.8	6.61	0.48	68.5	5.9	20.8	1.4	223	17	71.8	4.8	295	28	68.2	5.7	653	56	91.4	7.2	8930	240	0.56	0.12	185	16	168	13	10.1	4	1850	160
KRSV	KRSV_40	1265	13	2.08	0.34	20.9	2.6	3.05	0.42	22.2	2.2	25.7	3	4.68	0.62	58.3	4.3	17.22	0.99	185	11	54.2	2.7	208	11	46.2	2.2	450	22	51	2.2	7960	230	2.34	0.27	158.9	7	281	12	16.5	3.2	1388	74
KRSV	KRSV_41	1260	8.2	4.39	0.89	12.6	1.7	6.3	1.2	36.3	5.8	27.1	3.6	5.2	1.3	47.1	3.8	14.47	0.83	150.4	8.1	45.5	2.6	181	11	39.3	2.6	377	15	43.9	2	8590	200	1.27	0.23	130	6.7	251	11	20.8	4.3	1179	41
KRSV	KRSV_42	1415	12	0.257	0.017	4.72	0.25	0.849	0.057	12.02	0.9	21.1	1.6	2.53	0.33	76.1	3.2	24.9	1	321	12	111.6	4.1	514	18	118.7	4.8	1169	45	143.2	5.5	7980	280	0.88	0.15	195.9	7.8	129	13	30.5	4.6	2873	97
KRSV	KRSV_44	1874	18	0.69	0.21	10.1	1.2	1.32	0.26	10.9	2.2	17.6	3.3	2.69	0.75	41.2	3.1	11.81	0.73	141.6	9.2	45.8	1.9	190	7	42.7	1.7	398	15	52.8	1.8	8070	270	0.84	0.21	124.2	3.4	165.1	7.5	18.5	5.8	1191	36
KRSV	KRSV_46	1730	14	5.06	0.51	41	5	7.04	0.54	50.9	3.3	48.6	3.2	13.2	1.2	111.1	9.7	34.7	3.2	367	27	114.1	8.3	478	26	109.5	5.9	1074	47	134.5	3.7	9850	280	1.76	0.32	225	17	285	14	31	10	3020	170
KRSV	KRSV_47	1440	15	0.34	0.17	5	1.2	0.98	0.33	8	2	10.3	2.4	2.15	0.89	35	5.3	13.9	0.67	179	13	59.9	2.9	274	14	64.8	3.7	636	25	80.3	3.6	11190	400	0.99	0.31	88.8	5.4	146.1	3.7	15.5	9	1627	47
KRSV	KRSV_48	2441	13	0.013	0.015	3.66	0.2	0.074	0.017	1.25	0.16	5.17	0.69	0.22	0.13	21.6	1.4	7.26	0.29	69.2	3.1	15.65	0.62	53.4	1.9	9.42	0.39	81.2	3	8.86	0.4	10910	190	0.39	0.1	57.1	1.9	164.8	5	7.7	2.3	444.9	6.1
KRSV	KRSV_49	1580	12	0.376	0.032	4.72	0.28	0.755	0.049	7.42	0.41	11.46	0.95	3.35	0.31	38.1	2	11.94	0.53	140.5	5.9	46	1.7	190.9	8.2	41.7	2	403	17	54.6	1.7	7470	190	0.331	0.09	43.1	3.5	52.9	4.9	30.5	4	1216	40
KRSV	KRSV_50	1763	11	0.89	0.14	14.33	0.89	1.23	0.16	9.58	0.92	9.85	0.92	2.01	0.28	28.6	1.9	10.15	0.41	123.6	4.2	40.2	2.1	183.2	7.8	42.7	1.7	440	12	55.1	2.1	9760	160	1.29	0.15	141.4	6.7	232.2	8.6	13.8	2.5	1105	44
KRSV	KRSV_51	1733	7	0.076	0.047	8.97	0.45	0.15	0.068	1.07	0.38	1.34	0.44	0.08	0.12	6.2	1.1	2.13	0.22	27	2	9.9	0.5	50.4	3	13.08	0.64	137.5	6.3	19.18	0.89	10540	200	1.45	0.21	100	3.1	249.9	8.5	6.1	3.4	292.2	9.6
KRSV	KRSV_52	1386	9.8	0.142	0.027	5.59	0.32	0.344	0.054	5.68	0.38	10.8	1.2	1.48	0.3	51	2.8	17.07	0.7	218.6	6.9	74.8	1.9	315	13	69.5	2.9	647	23	79.7	2.8	8230	160	1.22	0.2	113.5	3.9	152.6	5.3	10.9	3	1967	52
KRSV	KRSV_53	1376	14	0.183	0.043	3.25	0.58	0.344	0.073	4.4	0.91	9	1.4	1.12	0.28	51.6	5.7	22	1.1	292	15	101.5	6.6	430	39	92.8	9.8	910	95	108	13	9810	330	1.53	0.24	122	20	282	21	16.6	3.5	2720	160
KRSV	KRSV_54	1853	24	2.63	0.35	25.8	3.8	4.86	0.61	39.9	3.6	47.5	8.3	13.8	2.1	108	15	26.7	2.7	263	41	64	6.3	248	25	54	4.4	561	59	63.5	6.5	10570	640	0.75	0.26	307	26	175	20	13.1	4.7	1710	200
KRSV	KRSV_56	1376	11	0.428	0.065	5.65	0.46	0.412	0.06	4.58	0.46	7	1.3	0.96	0.22	31.4	1.8	10.66	0.62	136.2	8.3	48.1	3.2	218	16	50.6	3	492	23	65.6	4.3	10040	130	1.01	0.21	95.2	5.5	181.8	8	19.9	5.4	1292	65
KRSV	KRSV_57	1828	12	0.68	0.13	34	2.4	1.35	0.21	15.2	2.2	19.9	2.7	3.25	0.55	53.9	5.8	15.1	1.3	169	12	51.8	3.1	213	13	46.9	2.3	443	23	56.5	2	9440	180	1.39	0.23	293	23	201	14	14.4	2.8	1423	89
KRSV	KRSV_58	1364	9.1	0.036	0.013	4.75	0.25	0.306	0.043	5.76	0.43	12.3	1.3	1.38	0.22	72.4	4.2	26.8	1	375	11	136.5	5.5	615	23	140.6	6.1	1406	46	175.1	6	9210	250	2.19	0.25	191.8	7.3	192.7	9.5	18.8	3.5	3560	120
KRSV	KRSV_59	1460	10	0.745	0.051	13.57	0.88	1.48	0.12	13.7	1.1	18.4	2.2	4.18	0.37	62.5	5.2	18.5	1.5	213	15	72.4	5.2	309	16	75.4	4.2	744	37	93	4.6	8300	210	0.77	0.23	160	15	172.1	9.1	19.7	5.5	1900	120
KRSV	KRSV_60	1252	22	0.71	0.49	4.7	1	0.35	0.16	2.25	0.47	2.65	0.92	0.39	0.26	12.7	2.1	4.35	0.61	50.9	5.7	17.2	1.6	70.8	5.6	16.6	1.3	162	16	22.1	2.1	7910	190	0.84	0.22	35.7	2.6	46.7	3.3	32	11	466	43
KRSV	KRSV_61	2720.4	11	0.087	0.022	31.74	0.92	0.324	0.034	5.17	0.38	10.7	1.4	0.74	0.12	46	2.5	12.08	0.42	130.4	3.8	38	1.2	152.1	5.5	31.4	1	300.2	9.7	37.9	1.1	9700	180	0.72	0.18	343	11	229.7	7.8	21	4.1	1025	19
KRSV	KRSV_62	1697	11	0.128	0.031	6.14	0.49	0.259	0.059	3.7	0.64	6.7	1.5	1.35	0.52	26.7	4.8	7.88	0.92	97.7	9.5	32.6	2.2	147.4	8.8	32.8	1.7	327	18	45.9	1.5	7970	120	0.6	0.17	91.5	7.2	147.7	6	15.1	3.3	918	59
KRSV	KRSV_63	1770	24	15.1	1.6	41.4	3.3	20.7	1.9	122	11	89.1	8.3	21	1.7	122.4	6.3	32.7	1.4	309	13	79.2	4.1	310	15	68.5	3.2	658	29	82.4	2.4	10150	290	1.1	0.3	84.3	5.4	362	14	11.6	4.1	2093	70
KRSV	KRSV_64	1369	12	0.15	0.047	2.25	0.28	0.418	0.091	5.73	0.96	10.6	2.6	1.54	0.98	48.8	7	19.5	1.7	286	22	95.9	7	391	33	82.2	7.1	750	66	87	9.6	9470	180	0.92	0.16	138	12	75.3	6	40.4	4.3	2470	160
KRSV	KRSV_65	1706	18	0.005	0.023	11.75	0.64	0.034	0.018	0.73	0.18	1.59	0.62	0.23	0.17	7.5	1.4	2.96	0.23	36.8	2.1	13.75	0.69	63.3	3	15.66	0.9	168.5	6.7	22.23	0.93	10260	200	0.88	0.21	64.1	3.2	102.4	9.1	4.4	3.1	386	17
KRSV	KRSV_66	1192	9.2	0.003	0.01	11.34	0.31	0.067	0.013	1.15	0.14	2.76	0.47	0.5	0.1	14.8	1.3	5.49	0.29	72.6	2.8	26.25	0.99	126	4.1	30.52	0.9	312.3	6.4	41.19	0.98	9830	120	1.17	0.18	63.7	2.6	79.5	2.3	20.3	3.7	738	19
KRSV	KRSV_67	2501	22	0.193	0.026	62.8	4.3	1.01	0.097	15.9	1.2	24	2	4.65	0.35	64.8	2.6	19.24	0.87	217	10	65.2	3.9	277	17	62.1	3.5	570	32	71.6	3.2	7480	140	1.22	0.22	148	13	67.9	6.3	15.6	3.2	1755	68
KRSV	KRSV_68	1366	14	0.005	0.017	0.63	0.083	0.08	0.021	1.34	0.19	3.94	0.9	0.12	0.14	29.1	3.1	11.09	0.81	116.3	6.5	32.1	2.4	106.5	8.4	20.9	2.2	194	18	22.6	2.5	11070	260	0.36	0.14	35.4	2.8	165	13	8.4	2.4	870	52
KRSV	KRSV_69	1390	12	0.25	0.1	3.7	1.2	0.49	0.12	5.5	1.1	8.8	1.3	1.39	0.52	50.7	6	21.7	3.4	297	66	105	29	480	140	105	33	1010	320	117	39	10440	270	0.71	0.21	75	14	188	12	16	3.6	2530	700
KRSV	KRSV_70	1414	14	3.42	0.58	41.8	5.3	5.32	0.99	38.8	6.5	33.6	4.5	10.2	2.1	70	11	19.1	2.1	190	19	52.5	3.8	213	11	49.6	2.1	518	23	70	2.4	9420	220	0.79	0.21	243	10	297	12	15.9	5.6	1418	71
KRSV	KRSV_71	2399	14	0.095	0.025	42.4	1.1	0.387	0.048	6.53	0.44	10.66	0.82	2.04	0.23	40.2	2.3	11.51	0.4	125.1	4	37.85	0.99	169.6	4.5	38.6	1.3	381.3	8.7	48.3	1.1	9280	150	0.73	0.13	217.3	5.4	130.2	3.2	7.6	2.7	1098	18
KRSV	KRSV_72	1251	17	11.5	3.5	55	13	15.3	4.7	83	24	60	17	27.2	8.9	83	16	22.3	4	214	28	58.3	6.4	235	20	50.1	3.2	476	33	56.3	3.2	9690	270	2.99	0.5	209	13	503	38	9.5	5.7	1490	120
KRSV	KRSV_73	1749	11	0.013	0.013	10.79	0.38	0.083	0.018	1.33	0.15	3.19	0.57	0.18	0.13	14.2	1.7	5.21	0.31	70.8	3.8	25.1	1.4	112.6	5.6	27.5	1.2	285	12	37.1	1.5	9470	120	1.27	0.16	94	5.8	138	3.7	16.5	5	690	32
KRSV	KRSV_74	1718	9.9	0.336	0.078	16.14	0.91	1.12	0.17	13.9	1.8	18.1	2.3	2.66	0.42	52	4.5	14.5	1.2	162	10	48.3	2.7	197.6	8.5	42.4	1.8	401	20	49.7	2	8690	120	0.99	0.18	224	14	210	6.6	23.1	4.3	1293	60
KRSV	KRSV_75	1862	16	0.68	0.12	14.87	0.69	0.89	0.14	7.2	0.76	8.7	1	1.51	0.24	26.6	2	8.87	0.36	109.3	3.8	35.9	1.6	159.2	5.3	36	1.3	352	13	46	1.5	9180	190	1.74	0.19	139.1	4.4	200.7	5.5	14.3	3	960	22
KRSV	KRSV_76	1456	12	0.3	0.11	6.89	0.58	0.68	0.15	8.23	0.99	12.4	1.8	2.1	0.38	53.3	2.9	17.72	0.66	219.4	7.2	73.2	2.5	311	11	70.2	2.5	664	19	84.5	2.5	7880	190	1.04	0.19	155.5	9.4	143	6.5	20.3	5	1934	44
KRSV	KRSV_77	1824	23	1.53	0.16	16.9	2	2.14	0.19	17	1.1	19.2	2.4	4.58	0.55	49.9	3.7	14.2	1	151.5	9.5	44.7	2.2	189	7.7	42.8	2.2	419	20	52.2	2.2	9400	110	0.76	0.23	160.6	5.7	162	11	18.2	4.4	1266	47
KRSV	KRSV_78	1387	11	0.628	0.049	5.65	0.5	0.943	0.097	8.91	0.83	15	1.7	2.56	0.45	57.4	5.5	19.7	1.3	201	11	49.8	3	161.4	8.9	31.7	2.9	270	29	29.5	3.1	11300	270	0.393	0.091	69.7	5.1	279	21	11.5	4.3	1439	65
KRSV	KRSV_79	1750	19	0.118	0.021	8.53	0.35	0.245	0.042	2.14	0.29	4.19	0.65	0.56	0.15	16.9	1.3	6.86	0.38	92.2	3.9	33	1.4	154.1	5.6	38.47	0.98	432	13	49.6	1.6	8880	250	1.54	0.19	110.7	4.6	273	10	12.1	3.2	889	29
KRSV	KRSV_80	1169	12	0.029	0.02	6.24	0.3	0.213	0.053	4.07	0.79	6.7	1.3	0.78	0.23	28.6	4.2	9.2	1.2	123	12	39.1	3.8	165	13	37	3.2	361	28	45.5	3.9	9150	160	0.86	0.23	64.7	5.9	49.4	2.4	25.1	5.7	1033	92
MGM01	MGM01_3	854	5.5	0.0081	0.0088	2.37	0.16	0.12	0.023	2.8	0.43	7.5	1.2	0.32	0.1	32.7	3.7	11.3	1.1	153	14	53.8	4.8	245	20	60.7	5	613	42	83.6	6.2	9650	110	1.12	0.16	116	13	241	18	15.3	2.5	1450	120
MGM01	MGM01_4	1815	15	0.127	0.027	4.97	0.44	0.213	0.051	2.89	0.48	6.8	1.4	1.88	0.38	30.5	1.9	9.43	0.69	125.7	6.3	45	2	210.8	6.2	51.2	2.1	525	15	66.6	2.1	11370	270	2.27	0.33	272	13	725	30	21.7	6.1	1258	39
MGM01	MGM01_5	859	4.8	0.33	0.031	8.68	0.52	0.804	0.068	10.3	0.73	22.5	1.6	9.53	0.84	74.3	3.2	23.11	0.87	258.7	9.9	80.6	3.5	334	16	78.2	2.9	774	23	95.7	3	9440	340	4.1	0.59	497	22	998	77	20.5	4	2092	81
MGM01	MGM01_6	875	6.9	0.031	0.015	1.34	0.21	0.062	0.022	1.29	0.24	4.16	0.93	0.57	0.25	22.7	3.1	9.53	0.78	132.2	8.6	48.8	3.2	217	15	55.8	5	563	55	69.7	7.8	10840	210	1.06	0.19	93	7.7	424	25	14.4	4.5	1356	86
MGM01	MGM01_7	834	7.2	0.0035	0.0083	2.7	0.13	0.144	0.019	2.56	0.3	5.64	0.68	0.228	0.089	31.7	2.9	11.03	0.99	133	11	44.9	3.6	194	16	45.4	3.9	447	36	57.9	4.3	9470	180	0.522	0.096	102	10	162	18	25.3	2.2	1208	95
MGM01	MGM01_8	846	9.8	0	0.011	3.17	0.37	0.036	0.012	1.1	0.16	2.43	0.44	0.077	0.079	18.2	1.2	6.85	0.46	90.5	6.3	33.2	2.6	150	12	39.1	4.1	409	45	52.8	5.8	11260	360	1.46	0.27	119	9.4	470	67	10.4	2.7	909	66
MGM01	MGM01_9	861	13	0.012	0.019	1.43	0.27	0.106	0.03	2.98	0.35	10.8	1.7	1.1	0.57	56.9	5.2	20.5	1.5	239	16	71.5	4.9	273	18	57	3.4	516	29	61.5	3.5	10100	250	0.59	0.13	117.2	8.9	335	16	12.2	3.1	1900	100
MGM01	MGM01_10	872	7.1	0.012	0.014	2.5	0.13	0.048	0.012	1.04	0.16	3.76	0.46	0.35	0.13	22.6	1.7	8.55	0.33	116.3	2.8	39.9	1.1	177.9	6	42	1.6	426	23	54.7	3.5	11270	240	1.7	0.23	98.7	3.9	451	35	9.1	2.4	1128	22
MGM01	MGM01_11	852	6.8	0.213	0.028	4.11	0.25	0.266	0.032	3.24	0.41	7.68	0.91	3.58	0.23	29.4	3	12.02	0.65	151.4	5.4	54	1.7	238.1	7	58.4	2.1	583	15	77.8	2.3	9620	150	1.84	0.36	287	12	618	28	14.1	4.5	1462	27
MGM01	MGM01_12	873	18	0.236	0.037	5.94	0.59	0.314	0.049	4.61	0.71	11.5	1.3	4.16	0.81	43	5.9	16	2	193	17	65.7	6.3	289	19	69.8	5.1	697	44	90.1	5.5	9700	300	2.78	0.4	355	30	931	61	16	3.7	1800	160
MGM01	MGM01_13	879	5.9	0.041	0.015	2.14	0.14	0.07	0.013	1.15	0.12	4.13	0.61	0.5	0.11	20.2	1.3	7.74	0.38	106	3	36.96	0.96	166.9	3.7	40.2	1.3	421	12	53.2	1.3	10430	160	1.45	0.16	97.3	2.9	327.4	6.3	17.7	4.5	1053	16
MGM01	MGM01_14	883	9.9	0.054	0.018	2.41	0.18	0.104	0.021	1.26	0.24	3.1	0.68	1.28	0.25	9.9	2.3	3.36	0.42	41.5	4.4	14.6	1.4	65.6	5.2	17.6	1.5	195	12	26.6	1.5	9980	240	1.04	0.22	126	15	578	46	11.7	3	394	30
MGM01	MGM01_15	855	8.1	0.021	0.013	4.09	0.35	0.054	0.015	1.25	0.2	3.11	0.58	0.36	0.14	21	2.3	7.64	0.39	104.5	4.1	38.4	1.5	182.6	7.3	45.4	1.3	478	15	64.4	1.8	10760	200	2.56	0.36	174.3	5.8	669	21	8.8	3.1	1083	21
MGM01	MGM01_16	890	16	0.38	0.14	24.2	2.8	0.9	0.3	8.5	2.8	17.6	4.1	8.5	2.5	58	12	17.6	2.8	208	29	62.3	7.8	273	31	66.4	7.7	684	69	83.8	7.9	9630	170	2.97	0.6	638	85	1060	140	22.7	6.8	1790	250
MGM01	MGM01_17	891	9.1	0.068	0.015	5.48	0.31	0.169	0.025	2.73	0.36	10.4	2	2.9	1	47.7	5.1	17.7	1.3	226	11	74.4	3.7	325	14	79.9	4	800	32	100.3	4.5	10620	160	1.81	0.19	317	15	951	59	6.1	2.2	2061	81
MGM01	MGM01_19	1905	29	0.049	0.02	6.6	0.22	0.088	0.019	1.71	0.18	5.04	0.66	0.26	0.12	20.4	2	5.14	0.31	54.6	2	17.07	0.72	68.7	2.7	15.18	0.77	155.3	6.3	19.75	0.92	9550	240	0.66	0.14	132.2	4.6	253.5	7.6	8	2	472	11
MGM01	MGM01_20	872	8	0.044	0.017	2.55	0.16	0.108	0.035	1.68	0.41	6	1.5	2.24	0.98	24.4	4.5	7.6	1.1	93	11	30	2	131	6.1	31.4	1.4	326	11	42.1	1.5	10480	240	1.06	0.18	98.8	3.8	281.7	9.9	9.7	3	801	46
MGT01	MGT01_1	575	9.4	0.018	0.027	6.2	1.3	0.063	0.017	0.93	0.27	0.79	0.4	0.72	0.25	4.1	1.7	1.91	0.45	24.9	2.4	8.84	0.52	46.7	1.5	12.42	0.91	157.1	6.9	20.7	1.9	8560	700	1.05	0.18	61	16	370	110	9.7	4.3	264	16
MGT01	MGT01_2	2473	29	0	0.015	16.49	0.55	0.055	0.018	0.73	0.19	1.47	0.55	0.27	0.15	7.5	1.2	2.42	0.24	33.3	3.1	11.87	0.78	54.4	2.4	13.7	0.86	144.6	8	18.9	1.2	9770	280	0.97	0.19	12.9	1.3	66.9	2.5	11.7	3.9	349	11
MGT01	MGT01_3	967	10	0.024	0.013	20.31	0.51	0.11	0.014	2.07	0.15	3.93	0.43	0.35	0.11	18.9	1.5	6.3	0.22	81	1.8	27.41	0.62	126.2	3.8	29.23	0.49	310.6	5.9	40.7	1	8520	120	0.87	0.14	66.8	1.2	76.7	2	3.3	2	759	11
MGT01	MGT01_4	566	3.9	0	0.0082	4.36	0.34	0.0088	0.0098	0.286	0.091	0.74	0.3	0.36	0.12	5.6	1.1	2.1	0.28	33.5	4.1	13.3	1.6	70.6	8	19.7	2.1	247	22	36.4	3.3	10590	260	1.4	0.14	57.8	3.7	359	21	9.1	2.4	436	52
MGT01	MGT01_5	742	8.9	0.078	0.019	10.28	0.69	0.5	0.062	8.37	0.69	12.6	1.9	1.08	0.22	51.1	3.7	16.68	0.81	192.2	9.4	59.4	2.7	264	14	57.9	3.5	578	29	63.4	2.8	7370	240	1.47	0.39	118.7	5.8	187	10	32	10	1624	54
MGT01	MGT01_6	1046	6.3	0.043	0.012	9.7	0.34	0.546	0.04	11.37	0.46	21.8	1.4	0.7	0.14	80.4	3.5	23.42	0.82	268.8	5.9	82.6	2.2	329.6	6.7	69	2	633	13	78.5	1.8	9540	150	1.3	0.17	100.7	3	190.9	3.7	8.5	2.6	2124	43
MGT01	MGT01_8	583	9	0.092	0.023	44.7	1.6	0.583	0.051	9.05	0.9	13.5	1.6	3.35	0.38	42.2	3.9	10.02	0.65	102.3	6.1	29.6	1.8	113.9	6	24.8	1.2	228.3	9.5	27.7	1.1	7160	200	0.72	0.21	98.9	3.9	46.2	3.4	21.9	4.2	782	39
MGT01	MGT01_9	630	19	0.12	0.22	0.12	0.11	0.05	0.077	0.38	0.43	0.52	0.61	0.36	0.23	1.7	1.2	0.64	0.18	17.6	2.5	8.09	0.58	33.8	3.7	8.34	0.62	74.2	5.4	6.6	0.6	10950	580	0.3	0.13	0.95	0.41	23.5	1.3	4.8	4.2	252	13
MGT01	MGT01_10	641	19	0.055	0.028	9.3	6.2	0.113	0.039	1.78	0.53	3.5	1.4	1.69	0.69	12.8	2.4	4.2	1.5	46	19	17.6	7.1	81	32	20.3	6.4	237	68	32.8	9.5	10220	400	0.2	0.19	71	14	92.6	9.9	2.3	5	410	160
MGT01	MGT01_11	1054	14	0.114	0.029	7.85	0.66	0.205	0.04	2.81	0.45	4.6	1.1	1.8	0.48	15.3	2.8	5.18	0.81	62.7	8	20.9	2.7	95	11	24.3	2.7	261	24	29.3	2.6	8420	190	0.39	0.13	112	15	106.8	9.5	7.5	3.3	546	61
MGT01	MGT01_12	950	8.2	0.008	0.014	13.38	0.34	0.059	0.013	1.33	0.14	3.65	0.42	0.44	0.13	12.32	0.82	3.75	0.16	52	1.5	18.52	0.51	88.6	1.9	22.36	0.58	225.4	5.5	30.54	0.94	8770	110	5.88	0.23	129.4	2.3	232.5	4.7	7.2	2.3	551.5	7.9
MGT01	MGT01_13	622	8.3	0.034	0.041	2.82	0.53	0.088	0.052	1.9	1.4	2.7	1.3	1.34	0.54	15	3.8	5.19	0.71	55	5.5	13.7	1.1	44.1	4.3	7.25	0.76	55.9	4.6	6.27	0.5	11800	250	2.01	0.34	38.6	3.5	596	13	4.2	4.3	405	34
MGT01	MGT01_14	2297	20	0.035	0.019	9.31	0.31	0.06	0.016	0.93	0.14	2.28	0.46	0.62	0.16	8.2	1.4	3.17	0.25	42.3	2.2	14.94	0.83	70.9	3.6	17.41	0.71	198.7	7.6	24.6	1	8540	180	0.84	0.14	58	3.3	87.2	7.6	7.5	1.8	409	12
MGT01	MGT01_15	597	7.9	7.3	1.7	54.9	3.5	2.85	0.52	20.9	3	15.5	2	4.37	0.54	35.8	4.4	9.41	0.84	97.6	8.1	27	2.4	108.6	8.4	23.3	1.7	236	15	27.7	1.6	6210	300	0.548	0.097	185	15	66.6	3.2	13.8	3.3	731	54
MGT01	MGT01_16	2564	24	0.37	0.21	23.45	0.81	0.244	0.058	2.91	0.4	4.43	0.76	1.34	0.15	14.9	1.4	4.49	0.27	49.5	2.2	15.62	0.67	64.7	2.4	14.6	0.59	151.6	4.6	18.64	0.69	8500	210	2.52	0.25	215.1	7.5	164.9	5.5	11.5	2.7	448	11
MGT01	MGT01_17	881	7.8	0.254	0.021	45.3	1.2	0.946	0.051	11.41	0.51	19.6	1.4	9.64	0.42	89.3	4	25	0.71	288	6.4	89.6	2.2	367.2	8.6	85.8	2.2	873	18	106.3	2.6	6050	140	4.34	0.24	1243	27	509	15	23.1	3.4	2430	48
MGT01	MGT01_18	828	14	0.027	0.012	3.85	0.18	0.084	0.02	1.54	0.24	2.75	0.48	0.51	0.14	11	1.2	3.92	0.21	48.7	2.5	15.85	0.54	69.1	3	16.07	0.86	171.4	5.8	20.5	1	7870	160	1.21	0.18	71.9	3.2	117.5	3.9	18.7	3.4	434	11
MGT01	MGT01_19	782	6.2	0	0.012	6.62	0.39	0.043	0.015	1.01	0.16	3.74	0.75	0.24	0.14	26.6	2.1	10.63	0.61	157.4	9.9	56.8	3.3	259	13	64.4	3.2	664	25	81.6	4	11080	280	2.35	0.28	96.7	8.1	212	11	6.8	2.4	1495	82
MGT01	MGT01_20	629	6.8	0	0.018	30.3	1.8	0.136	0.04	1.9	0.38	4.79	0.87	1.59	0.24	16.4	1.7	4.7	0.3	53.1	2.3	17.44	0.88	78.4	3.2	20.31	0.97	229	12	27.7	1.2	10230	200	1.71	0.27	175	12	278	29	17.8	3.6	511	18
MGT01	MGT01_21	1021	7.8	0.32	0.14	14.18	0.8	0.208	0.066	2.98	0.74	4.72	0.71	0.66	0.16	25.5	2.2	9.6	0.37	133.9	3.7	47.8	1.3	221.6	5.6	53.5	1.7	530	13	68.9	2.2	11580	190	5.37	0.32	81.9	5.6	157.9	6	0.4	3.6	1307	27
MGT01	MGT01_23	837	9.4	0.013	0.013	19.11	0.62	0.059	0.016	0.92	0.16	2.9	0.43	0.06	0.11	17	1.5	7.31	0.28	113.3	4.3	45.9	1.4	224.9	6.7	60.4	2.1	650	28	75.9	2.4	11460	320	17.91	0.95	160.3	5.2	600	20	1.9	2.8	1316	36
MGT01	MGT01_24	607	4.8	0.091	0.024	11.79	0.46	0.491	0.076	6.73	0.86	9.4	1.6	3.16	0.47	29.9	3	9.59	0.6	100.2	4.2	29.6	1.2	122.8	3.8	29.2	1.1	281.4	7.4	34	1.2	8940	170	2.12	0.26	176.7	4.5	372	11	11.1	4.1	783	20
MGT01	MGT01_25	703	8.5	0.244	0.067	7.27	0.35	0.73	0.11	7.5	1.5	14.8	4.2	6.1	1.6	48	12	16.3	4.1	182	40	47.7	7.7	175	21	42.1	3.8	406	24	51.3	2.4	9690	210	0.96	0.16	122.1	5.4	458	13	14.1	2.7	1180	180
MGT01	MGT01_26	567	7.1	0.032	0.016	44.3	1.2	0.19	0.019	2.86	0.21	4.71	0.61	1.31	0.21	16.9	1.2	4.49	0.22	47.2	1.9	14.98	0.4	61.5	1.7	14.43	0.73	142.6	5	17.98	0.48	7670	120	0.95	0.14	121.6	4.1	53.9	1.7	21.9	4.2	407.8	8.4
MGT01	MGT01_27	969	8.7	0	0.017	4.58	0.3	0.065	0.017	1.29	0.19	5.47	0.63	0.57	0.2	28.6	1.7	9.75	0.49	126.8	4.3	44.6	1.4	200.4	6.1	47.1	1.7	471	17	61.3	1.6	8050	200	0.48	0.11	46.1	2.5	77.1	5.1	11.9	3.1	1213	26
MGT01	MGT01_28	938	18	0.004	0.017	19.5	1.7	0.138	0.036	2.37	0.47	7.4	1.1	1.46	0.38	28.4	4.6	9.7	1.1	121	12	41.3	5	179	19	43.3	4.5	476	42	53.4	4.7	7730	260	0.77	0.19	67.8	8.3	119.5	8.5	7.3	4	1040	120
MGT01	MGT01_29	823	37	0.82	0.29	16.2	5.1	3.2	1.1	26	8.8	22	6.3	10	3.3	44	10	11.1	2.9	111	34	27	8.6	95	29	20.8	7.7	206	70	23.3	8.9	10390	690	0.53	0.33	78	29	236	47	15.4	7.4	720	210
MGT01	MGT01_30	1097	7.6	0.92	0.54	17.6	1.6	0.26	0.096	2.15	0.42	2.83	0.49	1.06	0.21	10.4	1.6	3.97	0.31	52.8	3.5	19.9	1.5	108.4	6.6	29.8	1.9	373	21	58.4	4.1	8940	120	1.16	0.19	157	12	241	11	2.2	2.3	617	36
MGT01	MGT01_31	639	9.4	0.472	0.096	5.44	0.74	0.36	0.11	2.84	0.83	6.3	1.4	1.69	0.34	20.2	1.9	6.85	0.25	83.8	7.8	26.9	2.8	122.9	8.3	29.2	3.4	293	31	37.1	2.7	7550	400	1.37	0.37	58.9	4.7	110	8.7	8.1	4.3	703	50
MGT01	MGT01_32	778	20	0.056	0.015	12.2	1.7	0.186	0.032	2.67	0.45	4.18	0.77	1.6	0.27	12.6	2.4	4.42	0.71	50.7	7.5	16.4	2.4	71.6	9.9	18.3	2.5	194	25	25.8	3.3	7000	150	0.44	0.11	192	32	186	11	6.1	2	439	63
MGT01	MGT01_33	2456	20	0.029	0.018	8.02	0.49	0.118	0.028	1.58	0.27	3.65	0.76	0.66	0.16	16.4	2.1	5.62	0.39	63.7	5.5	20.4	1.6	84.3	6.1	20.5	1.3	203	11	24.2	1.5	9420	260	0.92	0.27	207	14	271	22	12.9	3.2	583	33
MGT01	MGT01_34	604	4.2	0.443	0.063	21.7	1.1	2.04	0.27	21.6	2.6	34.4	4.9	12.1	1.1	80.7	6.6	21.1	1.6	198	13	50.4	2.7	183.4	7.7	39.4	1.8	364	20	43.8	1.3	10210	270	1.95	0.27	411	18	777	24	12.5	4	1319	49
MGT01	MGT01_35	731	8.6	0.03	0.021	5.86	0.22	0.116	0.031	2.34	0.27	4.79	0.77	0.42	0.14	23.7	1.2	7.59	0.29	97.8	2.8	34.12	0.94	155	4	36.5	1.2	363	11	46.7	1.8	6050	100	2.54	0.32	39.4	1.4	83.6	2.6	8.8	2.7	897	12
MGT01	MGT01_36	2476	11	0.045	0.023	18.21	0.88	0.08	0.022	1.28	0.33	2.24	0.63	0.22	0.17	10.6	2.1	3.75	0.28	46.4	3	16.4	1	75.6	3.5	18.6	1	203.3	6.6	26.4	1	9330	230	1.23	0.21	123	6.9	178	13	9.6	3.7	492	11
MGT01	MGT01_37	985	14	0.014	0.017	8	0.28	0.049	0.015	1.03	0.11	3.33	0.55	0.93	0.13	21.5	1.3	7.57	0.26	98.8	3	34.6	1	150.6	4	35.8	1.1	368.4	9.2	46.5	1.3	9590	180	0.288	0.099	29.4	1.1	48.4	1.3	9.1	3.2	946	13
MGT01	MGT01_38	970	11	0.038	0.019	7.43	0.26	0.183	0.03	2.45	0.27	6.34	0.67	1.44	0.2	29.5	1.3	10.11	0.51	136.5	5.6	51.1	2.5	241	10	59.2	2.7	611	29	80.2	3	7320	140	0.43	0.1	102.7	3.4	150.1	5.6	28.2	3.4	1447	55
MGT01	MGT01_39	785	8	2.2	2.3	29.8	5.7	0.93	0.73	7.9	3.9	9	1.8	1.78	0.31	31.4	4.9	9.5	1.2	110	12	35.5	3.9	157	16	35.2	3.3	337	27	42.7	3.7	8870	150	0.83	0.14	236	25	214	18	16	5.7	970	100
MGT01	MGT01_40	817	7.3	0.14	0.051	9.98	0.55	0.194	0.024	2.98	0.27	6.03	0.66	1.12	0.22	26.9	2.1	9.37	0.53	121.5	6.9	45.2	2.4	223	11	56.3	2.1	640	26	87.1	3.1	8790	260	0.57	0.12	139	8.7	248	20	13.7	4.3	1308	57
MGT01	MGT01_41	706	16	0.039	0.02	6.89	0.83	0.103	0.021	1.3	0.22	2.6	0.54	0.84	0.19	9.8	1.6	3.26	0.29	38.6	3.7	12.8	1	57.7	4.8	14.3	1.1	155.1	8.8	19.3	1.1	8870	220	0.88	0.2	51.5	5	115.1	6.9	10.1	2.4	344	27
MGT01	MGT01_42	858	9.5	0.65	0.45	17	1.9	0.28	0.16	2.5	1.1	3.5	1.9	0.46	0.26	12.9	4	4.32	0.94	57	11	20.7	3.8	96	16	24.5	3.9	269	28	34.6	3.6	10790	480	0.7	0.19	52.7	7.1	63.4	3.1	8	4.7	536	69
MGT01	MGT01_43	1847	24	0	0.014	4.7	0.38	0.204	0.046	4.22	0.51	9.7	1.5	0.16	0.17	33.4	5.6	10.9	1.1	129	13	42.8	3.1	179.2	8	39.1	2.1	378	18	48.4	2.9	9600	180	1.07	0.29	229	15	307	10	17.1	6.3	1145	71
MGT01	MGT01_44	813	20	1.82	0.51	28.7	6.3	6.9	2.6	72	27	81	28	30	10	162	49	47	13	420	110	97	20	346	63	67.5	9.7	596	68	68.1	8.1	8460	250	2.98	0.29	406	43	736	68	30.5	7.4	2310	470
MGT01	MGT01_45	544	9	0.236	0.047	18.6	1.5	0.777	0.071	11.9	0.76	18.8	1.8	7.25	0.52	56.1	3.2	17.62	0.97	199	11	58.2	3.7	253	16	59.8	4.3	649	34	70.9	4.3	5190	200	1.8	0.23	408	25	416	37	13.6	2.2	1580	83
